# Supplementary material for: Adverse birth outcomes in Guangdong province, China, 2014–2017: a spatiotemporal analysis of 2.9 million births
Source: PubMed Central journal article supplement — BMJ Open. 2019 Nov 14;9(11):e030629. doi: 10.1136/bmjopen-2019-030629 (PMC6886959; doi:10.1136/bmjopen-2019-030629), 2019-11-14
Supplement: bmjopen-2019-030629.draft_revisions.pdf [file bmjopen-2019-030629.draft_revisions.pdf]

# BMJ Open

BMJ Open is committed to open peer review. As part of this commitment we make the peer review history of every article we publish publicly available.

When an article is published we post the peer reviewers' comments and the authors' responses online. We also post the versions of the paper that were used during peer review. These are the versions that the peer review comments apply to.

The versions of the paper that follow are the versions that were submitted during the peer review process. They are not the versions of record or the final published versions. They should not be cited or distributed as the published version of this manuscript.

BMJ Open is an open access journal and the full, final, typeset and author-corrected version of record of the manuscript is available on our site with no access controls, subscription charges or pay-per-view fees (<http://bmjopen.bmj.com>).

If you have any questions on BMJ Open's open peer review process please email [info.bmjopen@bmj.com](mailto:info.bmjopen@bmj.com)

# BMJ Open

## Adverse pregnancy outcomes in Guangdong province, China, 2014-2017: a spatio-temporal analysis of 2.9 million births

|                               |                                                                                                                                                                                                                                                                                                                                                                                                                                                                                                                                                                                                                                                                                                                                                                                                                                                                                                 |
|-------------------------------|-------------------------------------------------------------------------------------------------------------------------------------------------------------------------------------------------------------------------------------------------------------------------------------------------------------------------------------------------------------------------------------------------------------------------------------------------------------------------------------------------------------------------------------------------------------------------------------------------------------------------------------------------------------------------------------------------------------------------------------------------------------------------------------------------------------------------------------------------------------------------------------------------|
| Journal:                      | <i>BMJ Open</i>                                                                                                                                                                                                                                                                                                                                                                                                                                                                                                                                                                                                                                                                                                                                                                                                                                                                                 |
| Manuscript ID                 | bmjopen-2019-030629                                                                                                                                                                                                                                                                                                                                                                                                                                                                                                                                                                                                                                                                                                                                                                                                                                                                             |
| Article Type:                 | Original research                                                                                                                                                                                                                                                                                                                                                                                                                                                                                                                                                                                                                                                                                                                                                                                                                                                                               |
| Date Submitted by the Author: | 27-Mar-2019                                                                                                                                                                                                                                                                                                                                                                                                                                                                                                                                                                                                                                                                                                                                                                                                                                                                                     |
| Complete List of Authors:     | Miao, Huazhang; Guangdong Women and Children Hospital, Department of Healthcare<br>Li, Wu; Guangdong Women and Children Hospital, Department of Healthcare<br>Li, Bing; Guangdong Women and Children Hospital<br>Yao, Fei; Guangdong Women and Children Hospital, Department of Healthcare<br>Chen, Ruyin; Shantou University Medical College, Department of Clinical Medicine<br>Chen, Yuliang; Shantou University Medical College, Department of Preventive Medicine<br>Lin, Jiumin; Second Affiliated Hospital of Shantou University Medical College, Department of Hepatology and Infectious Diseases<br>Wu, Yuntao; Guangdong Women and Children Hospital, Department of Healthcare<br>Guo, Pi; Shantou University Medical College, Department of Public Health<br>Zhao, Qingguo; Family Planning Research Institute of Guangdong Province, National Health and Family Planning Commission |
| Keywords:                     | PUBLIC HEALTH, EPIDEMIOLOGY, Community child health < PAEDIATRICS                                                                                                                                                                                                                                                                                                                                                                                                                                                                                                                                                                                                                                                                                                                                                                                                                               |
|                               |                                                                                                                                                                                                                                                                                                                                                                                                                                                                                                                                                                                                                                                                                                                                                                                                                                                                                                 |

SCHOLARONE™  
Manuscripts

---

## Adverse pregnancy outcomes in Guangdong province, China, 2014-2017: a spatio-temporal analysis of 2.9 million births

### Authors

Huazhang Miao <sup>1, †</sup>, Li Wu <sup>1, †</sup>, Bing Li <sup>1, †</sup>, Fei Yao <sup>1, †</sup>, Ruyin Chen <sup>2</sup>, Yuliang Chen <sup>3</sup>,  
Jiumin Lin <sup>4</sup>, Yuntao Wu <sup>1</sup>, Pi Guo <sup>3, \*</sup>, Qingguo Zhao <sup>5, \*</sup>

<sup>1</sup> Department of Healthcare, Guangdong Women and Children Hospital, Guangzhou, 511442, China

<sup>2</sup> Department of Clinical Medicine, Shantou University Medical College, Shantou 515041, China

<sup>3</sup> Department of Preventive Medicine, Shantou University Medical College, Shantou 515041, China

<sup>4</sup> Department of Hepatology and Infectious Diseases, the Second Affiliated Hospital, Shantou University Medical College, Shantou 515041, China

<sup>5</sup> Epidemiological Research Office of Key Laboratory of Male Reproduction and Genetics (National Health and Family Planning Commission), Family Planning Research Institute of Guangdong Province, Guangzhou 510600, China

† These authors contributed equally to this paper and they are co-first authors.

\* Pi G. (Email: pguo@stu.edu.cn) and Qingguo Z. (Email: zqgfrost@126.com) contributed equally to this paper and they are co-senior authors.

The manuscript word counts 3513 words.

---

## Abstract

**Objectives** Adverse birth outcomes pose a great threat to the public health and bring a heavy burden of disease in China. A comprehensive examination of the temporal and spatial trends of preterm birth (PTB), low birth weight (LBW), and small for gestational age (SGA) epidemics can provide some elementary information for subsequent etiological and epidemiological studies. This study aimed to characterize the spatio-temporal features of PTB, LBW, and SGA based on a large cohort of live births in China.

**Design** Spatio-temporal descriptive analysis was performed in Guangdong province, China, from 2014 to 2017.

**Setting** Data involving 2,917,098 live births in Guangdong province, China from 2014 to 2017 was collected from Guangdong Birth Certificate System. Information was collected, including the date of birth, gestational age in week, birth weight, sex of the infant, age of the mother, and registered residence of the mother.

**Results** The estimated rate of PTB, LBW and SGA was 4.16%, 4.14% and 12.86%, respectively. For temporal trends, the rates of PTB, LBW and SGA showed seasonal fluctuations, especially for LBW and SGA. In addition, there were regional differences in the rates of PTB, LBW and SGA between the Pearl River Delta and Non-Pearl River Delta regions. From 2014 to 2017, the high rates of PTB and LBW expanded from the Pearl River Delta region to the Non-Pearl River Delta regions. However, compared with the Pearl River Delta region, the rate of SGA was higher in the Non-Pearl River Delta regions on the whole.

**Conclusion** The findings of this study contribute to the understanding of the etiology and epidemiology of PTB, LBW and SGA in south China.

**Keywords:** Preterm birth; Low birth weight; Small for gestational age; Spatial; Temporal



---

### Strengths and limitations of this study

1. This study is one of the few studies based on a large cohort of newborns to reveal the current situation of adverse birth outcomes in China.
2. The findings of this study contribute to the better understanding of the characteristics of time trend and geographical distribution of adverse pregnancy outcomes in south China.
3. As a descriptive analysis, this study was unable to identify the causal relationship between spatio-temporal factors and adverse pregnancy outcomes.
4. Delays in reporting birth certificate data at small hospitals in different cities may cause bias.

---

## Introduction

Previous studies <sup>1, 2</sup> suggested that severe infant morbidity and mortality partly resulted from adverse birth outcomes including preterm birth (PTB), low birth weight (LBW) and small for gestational age (SGA). PTB is defined as a live-birth infant with less than 37 complete weeks of gestation <sup>3</sup>. LBW is defined as a live-birth infant weighing less than 2,500 grams at birth <sup>4</sup>. SGA is defined as an infant whose birth weight falls below the 10th percentile by sex and gestational week of all singleton live births <sup>5</sup>. With the development and progress of society and the continuous improvement of the level of medical care, the health condition of infants and young children has been significantly improved. However, adverse pregnancy outcomes such as PTB, LBW and SGA have not been effectively controlled, which has become an important risk factor for infant health. PTB rates were reported ranging from 6.2 % to 11.9% of live births in some developed and developing countries <sup>6</sup>. In fact, the incidence of LBW in developed countries is still high, and even rising <sup>7</sup>. Among 135 million infants born in low and middle income countries in 2010, it is estimated that 29.7 million (22%) were term births of SGA, and 2.8 million (2.1%) were preterm births of SGA <sup>8</sup>. Overall, these adverse birth outcomes pose a great threat to the health of infants.

Additionally, the adverse outcomes of PTB, LBW and SGA may also increase the risk of chronic diseases or developmental outcomes later in life <sup>9, 10</sup>. These facts show that PTB, LBW and SGA are still challenging problems of public health in many countries. Thus further research is needed to investigate the epidemiology of these problems more comprehensively. Many previous studies described significant seasonal variations of PTB, LBW or SGA with remarkable differences between regions <sup>11, 12</sup>. However, some researches didn't detect an association between temperature and adverse pregnancy outcome <sup>13-15</sup>. In fact, the conditions of evidence differed among different regions and studies. The complexity of PTB, LBW, SGA and relevant risk factors in the individual, social and spatial levels often make the causal relationship between identified risks and responses non-stationary in space and time. A

comprehensive examination of the temporal and spatial trends of PTB, LBW, and SGA can provide some basic elements for subsequent etiological and epidemiological studies.

Therefore, in order to fill in the gap, we performed a spatio-temporal analysis of PTB, LBW, and SGA, based on a large cohort involving approximately 3 million newborns in Guangdong province, China from 2014 to 2017. This study is more convincing because of the relatively large investigated samples. Additionally, this study analyzed regional differences of PTB, LBW and SGA between the Pearl River Delta and Non-Pearl River Delta regions. In general, the Pearl River Delta regions represent economically developed regions in Guangdong province, while Non-Pearl River Delta regions represent relatively underdeveloped regions. The findings of this study will contribute to the understanding of the etiology and epidemiology of PTB, LBW and SGA, and the design of prevention and intervention strategies for specific geographical areas and high-risk populations

## **Materials and methods**

### **Patient and Public involvement**

All birth data in this study was obtain from Guangdong Birth Certificate System and was only used for statistical analysis. Information of newborn and mothers across Guangdong province were collected in this study. No patients or public were involved in development of research question, study design, conduction of research and measurement of outcome. There are no plans of disseminating research results to participants. Ethical approval was obtained from ethics committee of Guangdong Woman & Children Hospital.

### **Data preparation**

All birth data was collected from the Guangdong Birth Certificate System, which collects information of infants and young children from medical institutions in Guangdong province. After childbirth, obstetric medical staff put the baby on an

1  
2  
3  
4 electronic scale, record stable weight data. Health care workers or midwives fill out  
5 the delivery information of the newborn in the regional maternal and child  
6 information system. The logical settings of the system have been corrected to ensure  
7 the convincing records. Finally, the information will be transferred to the Guangdong  
8 Birth Certificate System. After the data being imported, the midwife director and the  
9 hospital doctor director need to confirm the birth information. Before the birth  
10 certificate is issued, the department of medical management and the parents should  
11 check the birth information again. All the information is verified by medical  
12 professionals. The birth registration database contains the date of birth, gestational  
13 age in week, birth weight, sex of the infant, parity, age of the mother, and registered  
14 residence of the mother. All live newborns were included in the study except for  
15 stillbirths, deaths within days of birth and permanent birth defects. To reduce bias, the  
16 subset of births was limited to singleton live births with 22-42 completed weeks  
17 gestation <sup>16</sup>. After further excluding births with implausible birth weights (less than  
18 500 grams) <sup>17</sup> and verifying data, we included a total number of 2,914,198 births in  
19 our analysis.  
20  
21  
22  
23  
24  
25  
26  
27  
28  
29  
30  
31  
32  
33  
34  
35  
36

### 37 **Data analysis**

38 We described basic characteristics of the newborns and mothers, and the rates of PTB,  
39 LBW and SGA according to the studied characteristics by year was estimated and  
40 compared using  $\chi^2$  test. In order to observe the temporal trends in the occurrence of  
41 PTB, LBW and SGA in the study site, we calculated daily rates of PTB (daily number  
42 of live births with gestational age less than 37 weeks/daily number of live births  $\times$   
43 100%) <sup>3</sup>, daily rates of LBW (daily number of live births with birth weight less than  
44 2500 g / daily number of live births  $\times$  100%) <sup>4</sup>, daily rates of SGA (daily number of  
45 live births with birth weight less than the 10th percentile of the normal average birth  
46 weight at the same gestational age/daily number of live births at the same gestational  
47 age  $\times$  100%) <sup>18</sup>, respectively. We determined the season of birth based on the birth  
48 date (spring: March-May, summer: June-August; autumn: September-November,  
49 winter: December-February). Heatmaps of weekly average rates of PTB, LBW and  
50  
51  
52  
53  
54  
55  
56  
57  
58  
59  
60

SGA were drawn to investigate whether the rates exhibited an obvious seasonality.

According to economic conditions, Guangdong province can be divided into Pearl River Delta regions and Non-Pearl River Delta regions. Pearl River Delta regions are economically developed regions, including Guangzhou, Shenzhen, Foshan, Dongguan, Zhuhai, Zhongshan, Zhaoqing, Huizhou and Jiangmen cities. By contrast, Non-Pearl River Delta regions are relatively underdeveloped regions, including Shantou, Chaozhou, Jieyang, Shanwei, Zhanjiang, Maoming, Yangjiang, Yunfu, Shaoguan, Qingyuan, Meizhou and Heyuan cities. Besides, city boundary shape files of Guangdong province were publicly obtained and used for mapping and spatial cluster detection of the adverse birth outcomes. We mapped the spatial distributions of rates for the adverse birth outcomes to investigate the spatial distributions pattern of the birth outcomes through 2014 to 2017. SAS software version 9.3 (SAS Institute Inc.; Cary, NC, the United States) was used for the statistical analyses. All statistical tests were 2-tailed. *P*-value less than 0.05 were considered to be statistically significant.

## Results

Figure 1 shows the geographical locations of the study in Guangdong province. Guangdong province is located in southern China and is also currently the most populous province in China. From 2014 to 2017, there were 2,917,098 live newborns in Guangdong province, among which 1,254,102 were born in Pearl River Delta regions, accounting for 42.99%. There were 1,553,948 births (53.27%) were boys. There were 794,755 babies (27.24%) born in 2016, which accounts for a large proportion from 2014 to 2017. As illustrated in Table 1, the proportion of mothers who aged less than 20, 20 to 24, 25 to 29, 30 to 34, and over 35 years old was 2.68%, 22.78%, 39.87%, 23.38% and 11.29%, respectively. For the seasons of birth, the proportion of babies born in spring, summer, autumn and winter was 23.16%, 24.61%, 27.57% and 24.66%, respectively. There were 56,748 (42.96%) LBW of preterm births, while there were 63,968 (52.93%) LBW of term births. Regarding SGA infants, 2.47% were preterm births, while 97.53% were term births.

1  
2  
3  
4  
5 Table 2 reveals that the rates of PTB, LBW and SGA according to demographic  
6 characteristics, residence address and birth seasons by year. Infants born from women  
7 aged less than 35 years have higher rates of LBW and PTB outcomes than women  
8 younger than 35 years old. However, the rates of the difference were gradually  
9 decreasing from 2014 to 2017. From 2014 to 2016, there was a downward trend in the  
10 rates of SGA among pregnant women who were not less than 35 years old and less  
11 than 35 years old. In 2017, the rates for SGA by two groups of pregnant women rose  
12 slightly. Generally, infants who were born in the Pearl River Delta regions had higher  
13 rates of PTB and LBW than those who were born in Non-Pearl River Delta regions in  
14 Guangdong. However, infants who were born in the Pearl River Delta regions tended  
15 to have lower rates of SGA than those who were born in Non-Pearl River Delta  
16 regions. Boy and girl babies tended to be similar in the rates of the outcomes. We  
17 found the PTB rates of boys were higher than that of girls, among which the highest  
18 rate was in 2016 (5.02%). Besides, the LBW rates of girls were higher than that of  
19 boys, among which the highest rate was in 2017 (4.78%). For SGA, the highest rate  
20 was 14.46% in the girls group. In addition, the rates of PTB, LBW and SGA  
21 statistically varied among seasons of birth, respectively. For PTB, the highest rates  
22 were clustered in winter. For LBW, the highest rates did not show cluster tendency of  
23 season. However, for SGA, the highest rates were clustered in summer or autumn.

24  
25  
26  
27  
28  
29  
30  
31  
32  
33  
34  
35  
36  
37  
38  
39  
40  
41  
42  
43  
44 Figure 2 depicts daily time-series plots of the rates for the adverse pregnancy  
45 outcomes including PTB, LBW and SGA. Upon visual inspection, the rates of PTB,  
46 LBW and SGA show, to some degree, seasonal fluctuation trends, especially for the  
47 outcomes of PTB and SGA. In 2014, the rate of PTB ranged from 2.45% in October  
48 to 6.06% in February. The period of highest rates of PTB was between December and  
49 February. In 2015 and 2016, the rates of PTB in November were the lowest in the  
50 course of the year. In contrast, in 2016 and 2017, the highest rates of PTB were in  
51 October. In 2014, infants had a peak rate (5.61%) of LBW in September. Infants born  
52 from February to April were least likely to suffer from LBW, with the lowest rate  
53  
54  
55  
56  
57  
58  
59  
60

(2.55%) in March. In 2017, there was a similar pattern for LBW infants with the rate (2.80%) in February, which clearly lower than the figure between September and October. Additionally, the peak rate (6.30%) of LBW occurred in October. The average of daily rates of SGA was 14.30% in this study. During the period from 2014 to 2017, infants were least likely to suffer from SGA between January and March, which is similar to the outcome of LBW. In addition, infants were most likely to suffer from SGA between September and October.

Figure 3 depicts the heatmaps of weekly average rates for PTB, LBW and SGA across cities in Guangdong province, from 2014 to 2017. For most cities, there was a remarkable seasonality in the rates of the adverse pregnancy outcomes, especially for LBW and SGA.

Figure 4 shows the spatial distributions of PTB rates, as expressed in per 100 persons, in Guangdong, from 2014 to 2017. The figure revealed that the rates of PTB were relatively high in the Pearl River Delta regions. For the years of 2014 and 2015, the highest rates of PTB were in Zhongshan and Foshan cities, located in Pearl River Delta regions. In 2016, the city of Foshan had the highest rate of PTB. Additionally, we observed that Yunfu which was located near the Pearl River Delta region had a distinctly high rate of PTB in 2016. In 2017, the city of Zhongshan has the highest rate of PTB.

Figure 5 and 6 depict the maps of spatial distributions of rates for LBW and SGA in Guangdong, respectively. In the years of 2014 and 2015, the rates of LBW were relatively high in the cities including Zhongshan, Foshan, Dongguan and Guangzhou in Pearl River Delta regions. In 2016, the rates of LBW were relatively high in Guangzhou, Huizhou, Dongguan and Foshan. In 2017, the rates of LBW were relatively high in Zhongshan, Huizhou, and Guangzhou in the Pearl River Delta region. For the outcomes of SGA, the cities including Shantou, Zhaoqing, and Yunfu had higher rates than other cities from 2014 to 2017. In addition, the rate of SGA in



1  
2  
3  
4 Foshan was also high in 2017.  
5  
6

## 7 **Discussion**

8  
9 Our study analyzed a total number of 2,917,098 live births to reveal the characteristics  
10 of the temporal trends and spatial distributions of PTB, LBW and SGA in Guangdong  
11 province from 2014 to 2017.  
12  
13  
14

15  
16  
17 For PTB, Beck et al.<sup>6</sup> reported in a systematic review that 9.6% were preterm births  
18 among 12.9 million births worldwide in 2005. A study estimated 14.9 million babies  
19 were preterm births in 2010, accounting for 11.1% of all live births worldwide,  
20 ranging from about 5% in several European countries to 18% in some African  
21 countries<sup>19</sup>. A study revealed that PTB rate was around 4.75% among 10 counties and  
22 cities in China, based on Perinatal Healthcare Surveillance System from 1993 to  
23 2005<sup>20</sup>. As the United Nations International Children's Emergency Fund (UNICEF)  
24 announced in 2007, the rates of LBW in China were still lower than those of some  
25 developed countries, such as the United States (8%), Australia (7%), the United  
26 Kingdom (8%), Canada (6%), and Japan (8%)<sup>10</sup>. However, the rate of LBW in China  
27 was slightly higher than the figure in South Korea (4%). According to a survey  
28 covering 14 provinces in China, the LBW rate in 1998 was 5.87%, and it decreased to  
29 4.6% in 2006<sup>21</sup>. For the worldwide rates of SGA, a previous study showed the rates  
30 were relatively high in Cambodia (18.8%), Nepal (17.9%), the Occupied Palestinian  
31 Territory (16.1%) and Japan (16.0%), while rates were relatively low in Afghanistan  
32 (4.8%), Uganda (6.6%) and Thailand (9.7%)<sup>10</sup>. In addition, a recent cross-sectional  
33 population-based study revealed that the rate of SGA was 12.93% from January 1,  
34 2017 to October 31, 2017 in southern China<sup>22</sup>. However, the study was based on a  
35 relatively small size of data. Our study, based on a large size of data, revealed that the  
36 rates of PTB, LBW and SGA in Guangdong province were relatively low, compared  
37 with other countries in the world.  
38  
39  
40  
41  
42  
43  
44  
45  
46  
47  
48  
49  
50  
51  
52  
53  
54  
55  
56  
57  
58  
59  
60

The data represents statistically significant seasonal variations of births and adverse



1  
2  
3  
4 birth outcomes in Guangdong province, China. Seasonal patterns of birth outcomes  
5 were not consistent, which may reflect different etiologies and risk factors of time for  
6 each of the examined birth outcomes. For the rates of PTB, the highest number almost  
7 occurred in winter. Besides, for SGA, the highest rates were in summer or autumn  
8 from 2014 to 2017. Studies in developed countries such as Greece <sup>23</sup>, Atlanta <sup>24</sup> and  
9 South Korea <sup>25</sup> revealed that PTB has a seasonal trend. LBW was also found seasonal  
10 trends<sup>26</sup>. A study revealed that PTB and SGA showed divergent patterns of  
11 seasonality in rural African community <sup>27</sup>. Seasonality of PTB, LBW and SGA was  
12 also found in Nepal. Our study indicated that the rate of PTB in November was the  
13 lowest in 2015 and 2016, while the rate in October was the highest in 2016 and 2017.  
14 Hughes et.al <sup>28</sup> also found infants were least likely to suffer from SGA from January  
15 to March. In contrast, Infants were most likely to suffer from SGA from June to  
16 August and in November. In our study, the rates of SGA peaked in the time period  
17 between September and October, and the rates were relatively low from January to  
18 March. In some countries, it was also reported that PTB had an obvious seasonal trend.  
19 In London <sup>29</sup>, babies born in winter were more likely to suffer from PTB compared  
20 with those born in spring. In Gambia <sup>27</sup>, the rates of PTB peaked twice in a year, once  
21 in the hunger season in July and once in October. However, a previous study from the  
22 United States reported no seasonality in the rates of PTB <sup>30</sup>. We speculate that the  
23 inconsistent results from different countries were partly due to the differences in the  
24 study population related to geography, culture and socio-economics. Environmental  
25 factors including temperature, humidity, and sunlight have been associated with birth  
26 outcomes. According to an animal model, a biological explanation for increasing the  
27 risk of PTB is that high temperatures increase the chances of dehydration <sup>31</sup>. This  
28 effect increases the risk of PTB due to decreased uterine blood flow and increased  
29 secretion of prostaglandins and oxytocin. Another hypothesis is that the effect of  
30 sunlight on vitamin D levels may affect fetal growth <sup>32</sup>. A study indicated that  
31 seasonal patterns are potential representatives of various environmental exposures <sup>33</sup>.

32  
33  
34  
35  
36  
37  
38  
39  
40  
41  
42  
43  
44  
45  
46  
47  
48  
49  
50  
51  
52  
53  
54  
55  
56  
57  
58  
59  
60 In terms of spatial factors, the PTB, LBW and SGA rates in the Pearl River Delta

1  
2  
3  
4 region were significantly different from those in the non-Pearl River Delta region. A  
5 regional analysis in Japan revealed that incidence of PTB was 3.2% in coastal areas  
6 and 5.0% in inland areas, respectively, and the incidence of LBW was 6.5% in the  
7 coastal areas and 8.5% in the inland areas<sup>34</sup>. Our results of geographical distributions  
8 of the adverse pregnancy outcomes were basically consistent with the results from  
9 Brazilian regions, in which a higher LBW rates were observed in the developed  
10 regions compared with less developed regions<sup>35</sup>. Overall, from 2014 to 2017, the high  
11 rates of PTB and LBW expanded from the Pearl River Delta region to the Non-Pearl  
12 River Delta regions. The trend of LBW rates increased in less developed areas of  
13 Guangdong province year by year. Previous studies also suggested that PTB is often  
14 associated with LBW, and their risk factors are similar<sup>36, 37</sup>. Our study indicated that  
15 the rates of SGA in the non-Pearl River Delta regions were generally higher than the  
16 Pearl River Delta regions. In China, the Pearl River Delta region has better economic  
17 situation, education condition and nutritional support than the non-Pearl River Delta  
18 regions. Therefore, according to our actual situation, we need to pay more attention to  
19 relatively poor regions. We recommend increasing investment in its economic,  
20 medical and health resources. Previous study indicated that regional factors may  
21 affect birth outcomes through psychosocial processes associated with health behavior,  
22 physiological stress hormones, or increased susceptibility to infection<sup>38</sup>. In the future  
23 work, we hope to further explore this topic by introducing more variables into the  
24 spatio-temporal model, rather than just economic conditions. Because there are few  
25 reports on the regional distribution of adverse pregnancy outcomes in China, the  
26 contribution of this study is to analyze the characteristics of adverse pregnancy  
27 outcomes in Guangdong province from two aspects: time trend and geographical  
28 distribution.

29  
30  
31  
32  
33  
34  
35  
36  
37  
38  
39  
40  
41  
42  
43  
44  
45  
46  
47  
48  
49  
50  
51  
52  
53  
54 In fact, it is often difficult for developing countries to obtain accurate and complete  
55 demographic data and medical records for maternal delivery. This present study made  
56 use of high quality data of birth certificate from a structured database of birth  
57 certificate in Guangdong province. The results of this study involving a large cohort  
58  
59  
60

of live births provide a clear description of temporal trends and spatial distributions of PTB, LBW and SGA in Guangdong province, which can be a high-quality baseline indicator for the researchers and decision makers of the public health.

This study does have several limitations. First, this study was just a descriptive analysis of temporal trends and spatial distributions of the adverse pregnancy outcomes, and unable to identify the causal relationship between spatio-temporal factors and adverse pregnancy outcomes. Although we used time trend profiles to roughly observe seasonal patterns, we did not consider potential factors that are difficult to measure, such as maternal infections and nutritional deficiencies. Second, it should note that there may have some delays in reporting birth certificate data at small hospitals in different cities, which can also have a potential impact on our study.

In summary, our study is one of the few studies based on a large cohort of newborns to understand the public health problem of adverse birth outcomes in China. The findings of this study contribute to the understanding of the etiology and epidemiology of PTB, LBW and SGA.

### **Funding**

This work was supported by the National Natural Science Youth Fund of China (No. 81703323). The funder had no role in study design, data collection and analysis, decision to publish, or preparation of the manuscript.

### **Competing interests**

The authors declare there is no conflict of interest regarding the publication of this paper.

### **Contributions**

HZM, LW, FY contributed equally in this study and they are joint first authors. HZM,

1  
2  
3  
4 PG, BL, and QGZ conceived of or designed study. HZM, BL, FY, YLC, RYC, YTW,  
5 and PG performed research. HZM, PG, and FY analyzed data. PG, HZM, JML, and  
6 FY wrote and revised the paper. PG obtained the funding.  
7  
8  
9

### 10 11 12 **Patient consent**

13  
14 All data was collected from the Guangdong Birth Certificate System that collects  
15 information of infants and young children from medical institutions in Guangdong  
16 province. No patient consent form needed for data collection.  
17  
18  
19

### 20 21 22 **Ethics approval**

23  
24 This study was approved by the ethics committee of Guangdong Woman & Children  
25 Hospital (Shantou, China).  
26  
27  
28

### 29 30 31 **Data sharing**

32  
33 No additional data are available.  
34  
35  
36  
37  
38  
39  
40  
41  
42  
43  
44  
45  
46  
47  
48  
49  
50  
51  
52  
53  
54  
55  
56  
57  
58  
59  
60

---

## References

1. Mathews TJ, MacDorman MF. Infant mortality statistics from the 2008 period linked birth/infant death data set. *Natl Vital Stat Rep*2012;60:1-27.
2. Owen LS, Manley BJ, Davis PG, et al. The evolution of modern respiratory care for preterm infants. *LANCET*2017;389:1649-59.
3. WHO. WHO: recommended definitions, terminology and format for statistical tables related to the perinatal period and use of a new certificate for cause of perinatal deaths. Modifications recommended by FIGO as amended October 14, 1976. *Acta ObstetGynecolScand*1977;56:247-53.
4. Wardlaw T, Blanc A, Zupan J, et al. Low birthweight: country regional and global estimates. *New York New York Unicef Dec* 2004.doi:i9280638327
5. Saenger P, Czernichow P, Hughes I, et al. Small for Gestational Age: Short Stature and Beyond. *Endocrine Reviews*, 2007;28(2)219-251.
6. Beck S, Wojdyla D, Say L, et al. The worldwide incidence of preterm birth: a systematic review of maternal mortality and morbidity. *Bull World Health Organ*2010;88:31-8.doi: 10.2471/BLT.08.062554
7. Lawn JE, Cousens SN, Darmstadt GL, et al. 1 year after The Lancet Neonatal Survival Series--was the call for action heard? *LANCET*2006;367:1541-7.doi:10.1016/S0140-6736(06)68587-5
8. Lee ACD, Katz JS, Blencowe HM, et al. National and regional estimates of term and preterm babies born small for gestational age in 138 low-income and middle-income countries in 2010. *LANCET GLOB HEALTH* 2013;1:e26-36.doi:10.1016/S2214-109X(13)70006-8
9. Tamura N, Hanaoka T, Ito K, et al. Different Risk Factors for Very Low Birth Weight, Term-Small-for-Gestational-Age, or Preterm Birth in Japan. *Int J Environ Res Public Health* 2018;15(2):369.doi:10.3390/ijerph15020369
10. Ota E, Ganchimeg T, Morisaki N, et al. Risk factors and adverse perinatal outcomes among term and preterm infants born small-for-gestational-age: secondary analyses of the WHO Multi-Country Survey on Maternal and Newborn Health. *PLOS ONE*

- 
- 2014;9:e105155.doi:10.1371/journal.pone.0105155
11. Strand LB, Barnett AG, Tong S. The influence of season and ambient temperature on birth outcomes: a review of the epidemiological literature. *ENVIRON RES*2011;111:451-62.doi:10.1016/j.envres.2011.01.023
  12. Ha S, Zhu Y, Liu D, et al. Ambient temperature and air quality in relation to small for gestational age and term low birthweight. *ENVIRON RES*2017;155:394-400.doi:10.1016/j.envres.2017.02.021
  13. Lee SJ, Hajat S, Steer PJ, et al. A time-series analysis of any short-term effects of meteorological and air pollution factors on preterm births in London, UK. *ENVIRON RES*2008;106:185-94.doi:10.1016/j.envres.2007.10.003
  14. Tustin K, Gross J, Hayne H. Maternal exposure to first-trimester sunshine is associated with increased birth weight in human infants. *DEV PSYCHOBIO*2004;45:221-30.doi:10.1002/dev.20030
  15. Madsen C, Gehring U, Walker SE, et al. Ambient air pollution exposure, residential mobility and term birth weight in Oslo, Norway. *ENVIRON RES*2010;110:363-71.doi:10.1016/j.envres.2010.02.005
  16. Johnson S, Bobb JF, Ito K, et al. Ambient Fine Particulate Matter, Nitrogen Dioxide, and Preterm Birth in New York City. *ENVIRON HEALTH PERSP*2016;124:1283-90.doi:10.1289/ehp.1510266
  17. Liu S, Krewski D, Shi Y, et al. Association between gaseous ambient air pollutants and adverse pregnancy outcomes in Vancouver, Canada. *ENVIRON HEALTH PERSP*2003;111:1773-8.doi:10.1289/ehp.6251
  18. Li Z, Rong Z, Shulian Z, et al. Chinese neonatal birth weight curve for different gestational age. *Chin J Pediatr*2015;53:97-103.
  19. Blencowe H, Cousens S, Oestergaard MZ, et al. National, regional, and worldwide estimates of preterm birth rates in the year 2010 with time trends since 1990 for selected countries: a systematic analysis and implications. *LANCET*2012;379:2162-72.doi:10.1016/S0140-6736(12)60820-4
  20. Liu L, Liu J, Liu Y, et al. Prevalence of preterm birth among singletons in 10

- counties(cities)of China, 1993—2005. *Chin J Epidemiology* 2007;1051-4.
21. Dongmei Y, Liyun Z, Aidong L, et al. Incidence of low birth weight of neonates and the influencing factors in China. *CHINESE JOURNAL OF PREVENTIVE MEDICINE* 2007;150-4.
22. Yao F, Miao H, Li B, et al. New birthweight percentiles by sex and gestational age in Southern China and its comparison with the INTERGROWTH-21st Standard. *Sci Rep*2018;8:7567.doi:10.1038/s41598-018-25744-7
23. Georgios B, Athanasios M, Derek H, et al. Preterm birth seasonality in Greece: an epidemiological study. *Journal of Maternal-Fetal Medicine*2012;25:1406-12.
24. Darrow LA, Strickland MJ, Mitchel K, et al. Seasonality of birth and implications for temporal studies of preterm birth. *EPIDEMIOLOGY*2009;20:699-706.doi:10.1097/ede.0b013e3181a66e96
25. Woo Y, Ouh Y, Ahn KH, et al. Seasonal Pattern of Preterm Births in Korea for 2000 - 2012. *J KOREAN MED SCI*2016;31:1797-801.doi:10.3346/jkms.2016.31.11.1797
26. Rousham EK, Gracey M. Seasonality of low birthweight in indigenous Australians: an increase in pre-term birth or intrauterine growth retardation? *Aust N Z J Public Health*2010;22:669-72.doi:10.1111/j.1467-842X.1998.tb01467.x
27. Rayco-Solon P, Fulford AJ, Prentice AM. Differential effects of seasonality on preterm birth and intrauterine growth restriction in rural Africans. *AM J CLIN NUTR*2005;81:134-9.doi:10.1016/j.jgo.2014.09.086
28. Hughes MM, Katz J, Mullany LC, et al. Seasonality of birth outcomes in rural Sarlahi District, Nepal: a population-based prospective cohort. *BMC Pregnancy Childbirth*2014;14:310.doi:10.1186/1471-2393-14-310
29. Lee SJ, Steer PJ, Filippi V. Seasonal patterns and preterm birth: a systematic review of the literature and an analysis in a London-based cohort. *BJOG*2006;113:1280-8.doi:10.1111/j.1471-0528.2006.01055.x
30. Konte JM, Creasy RK, Laros RJ. California North Coast Preterm Birth Prevention project. *OBSTET GYNECOL*1988;71:727-30.doi:10.1016/0378-5122(88)90133-8



- 1  
2  
3  
4 31. Stan CM, Boulvain M, Pfister R, et al. Hydration for treatment of preterm labour.  
5  
6 *Cochrane Database Syst Rev* 2013:D3096.doi:10.1002/14651858.CD003096
- 7  
8 32. McGrath JJ, Barnett AG, Eyles DW. The association between birth weight,  
9  
10 season of birth and latitude. *ANN HUM*  
11  
12 *BIOL*2005;32:547-59.doi:10.1080/03014460500154699
- 13  
14 33. Kim SE, Honda Y, Hashizume M, et al. Seasonal analysis of the short-term  
15  
16 effects of air pollution on daily mortality in Northeast Asia. *SCI TOTAL*  
17  
18 *ENVIRON*2017;576:850-7.doi:10.1016/j.scitotenv.2016.10.036
- 19  
20 34. Sugawara J, Iwama N, Hoshiai T, et al. Regional Birth Outcomes after the 2011  
21  
22 Great East Japan Earthquake and Tsunami in Miyagi Prefecture. *Prehosp*  
23  
24 *Disaster Med*2018;33:215-9.doi:10.1017/S1049023X18000183
- 25  
26 35. de Souza BV, Hirakata V, Goldani MZ, et al. Temporal evolution of the risk  
27  
28 factors associated with low birth weight rates in Brazilian capitals (1996-2011).  
29  
30 *Popul Health Metr*2016;14:15. doi:10.1186/s12963-016-0086-0
- 31  
32 36. Trasande L, Malecha P, Attina TM. Particulate Matter Exposure and Preterm  
33  
34 Birth: Estimates of U.S. Attributable Burden and Economic Costs. *ENVIRON*  
35  
36 *HEALTH PERSP*2016;124:1913-8.doi:10.1289/ehp.1510810
- 37  
38 37. Woodruff TJ, Parker JD, Darrow LA, et al. Methodological issues in studies of  
39  
40 air pollution and reproductive health. *ENVIRON*  
41  
42 *RES*2009;109:311-20.doi:10.1016/j.envres.2008.12.012
- 43  
44 38. Schempf A, Strobino D, O'Campo P. Neighborhood effects on birthweight: an  
45  
46 exploration of psychosocial and behavioral pathways in Baltimore, 1995--1996.  
47  
48 *SOC SCI MED*2009;68:100-10.
- 49  
50  
51  
52  
53  
54  
55  
56  
57  
58  
59  
60



---

## Figure legends

**Figure 1. Geographical locations of the study.** Guangdong province is located in south China, and there are twenty-one cities including Guangzhou, Shenzhen, Foshan, Dongguan, Zhuhai, Zhongshan, Zhaoqing, Huizhou, Jiangmen, Chaozhou, Shantou, Jieyang, Meizhou, Shanwei, Shaoguan, Heyuan, Qingyuan, Yunfu, Yangjiang, Maoming, and Zhanjiang included in this study. The Pearl River Delta regions were marked with pink, and the Non-Pearl River Delta regions were indicated by light blue.

**Figure 2. Daily time-series plots of rates for the adverse pregnancy outcomes including preterm birth (PTB), low birth weight (LBW) and small for gestational age (SGA) in Guangdong province, China, from 1 January 2014 to 31 December 2017.**

**Figure 3. Heatmaps of weekly counts for the adverse pregnancy outcomes including preterm birth, low birth weight and small for gestational age across cities in Guangdong province, China, from January 1, 2014 to December 31, 2017.**

**Figure 4. Spatial distributions of rates of preterm birth (PTB), in Guangdong province, China, from January 1, 2014 to December 31, 2017. (A) Spatial distributions of PTB rates in 2014. (B) Spatial distributions of PTB rates in 2015. (C) Spatial distributions of PTB rates in 2016. (D) Spatial distributions of PTB rates in 2017.**

**Figure 5. Spatial distributions of rates of low birth weight (LBW), in Guangdong province, China, from January 1, 2014 to December 31, 2017. (A) Spatial distributions of LBW rates in 2014. (B) Spatial distributions of LBW rates in 2015. (C) Spatial distributions of LBW rates in 2016. (D) Spatial distributions of LBW rates in 2017.**

1  
2  
3  
4 **Figure 6. Spatial distributions of rates of small for gestational age (SGA), in**  
5 **Guangdong province, China, from January 1, 2014 to December 31, 2017. (A)**  
6 **Spatial distributions of SGA rates in 2014. (B) Spatial distributions of SGA rates in**  
7 **2015. (C) Spatial distributions of SGA rates in 2016. (D) Spatial distributions of SGA**  
8 **rates in 2017.**  
9  
10  
11  
12  
13  
14  
15  
16  
17  
18  
19  
20  
21  
22  
23  
24  
25  
26  
27  
28  
29  
30  
31  
32  
33  
34  
35  
36  
37  
38  
39  
40  
41  
42  
43  
44  
45  
46  
47  
48  
49  
50  
51  
52  
53  
54  
55  
56  
57  
58  
59  
60

For peer review only

## Tables

**Table 1. Basic characteristics of the study participants.**

| Characteristic                  | Category                     | Frequency | Percentage |
|---------------------------------|------------------------------|-----------|------------|
| Maternal age (years)            | < 20                         | 78116     | 2.68       |
|                                 | 20-24                        | 664443    | 22.78      |
|                                 | 25-29                        | 1163071   | 39.87      |
|                                 | 30-34                        | 682067    | 23.38      |
|                                 | ≥ 35                         | 329378    | 11.29      |
|                                 | Missing                      | 23        | 0.00       |
| Inhabited city                  | Pearl River Delta region     | 1254102   | 42.99      |
|                                 | Non-Pearl River Delta region | 1662996   | 57.01      |
| Infant sex                      | Boy                          | 1553948   | 53.27      |
|                                 | Girl                         | 1363125   | 46.73      |
|                                 | Missing                      | 25        | 0.00       |
| Year of birth                   | 2014                         | 763518    | 26.17      |
|                                 | 2015                         | 627146    | 21.50      |
|                                 | 2016                         | 794755    | 27.24      |
|                                 | 2017                         | 731679    | 25.08      |
| Season of birth                 | Spring                       | 675595    | 23.16      |
|                                 | Summer                       | 717762    | 24.61      |
|                                 | Autumn                       | 804275    | 27.57      |
|                                 | Winter                       | 719466    | 24.66      |
| Preterm birth                   | Yes                          | 121245    | 4.16       |
|                                 | No                           | 2792953   | 95.74      |
|                                 | Missing                      | 2900      | 0.10       |
| Low birth weight (LBW)          | Yes                          | 120846    | 4.14       |
|                                 | No                           | 2796122   | 95.85      |
|                                 | Missing                      | 130       | 0.00       |
| Small for gestational age (SGA) | Yes                          | 384637    | 12.86      |
|                                 | No                           | 2529522   | 82.88      |
|                                 | Missing                      | 2939      | 4.26       |
| Low birth weight (Yes)          | Preterm                      | 56748     | 46.96      |
|                                 | Full-term                    | 63968     | 52.93      |
|                                 | Missing                      | 130       | 0.11       |
| Small for gestational age (Yes) | Preterm                      | 9499      | 2.47       |
|                                 | Full-term                    | 375138    | 97.53      |

**Table 2. Rates of preterm birth (PTB), low birth weight (LBW) and small for gestational age (SGA) according to demographic characteristics, residence address and birth season by year.**

| Year | Characteristic               | Adverse pregnancy outcome |         |         |
|------|------------------------------|---------------------------|---------|---------|
|      |                              | PTB (%)                   | LBW (%) | SGA (%) |
| 2014 | Maternal age (years)         |                           |         |         |
|      | < 35                         | 3.79                      | 4.04    | 14.39   |
|      | ≥ 35                         | 6.43                      | 5.17    | 10.54   |
|      | Inhabited city               |                           |         |         |
|      | Pearl River Delta region     | 5.03                      | 4.49    | 11.75   |
|      | Non-Pearl River Delta region | 3.39                      | 3.91    | 15.43   |
|      | Infant sex                   |                           |         |         |
|      | Boy                          | 4.43                      | 3.63    | 13.81   |
|      | Girl                         | 3.47                      | 4.68    | 14.46   |
|      | Season of birth              |                           |         |         |
|      | Spring                       | 3.78                      | 3.96    | 13.85   |
|      | Summer                       | 3.85                      | 4.19    | 14.88   |
|      | Autumn                       | 3.80                      | 4.21    | 14.88   |
|      | Winter                       | 4.48                      | 4.10    | 12.80   |
| 2015 | Maternal age (years)         |                           |         |         |
|      | < 35                         | 3.79                      | 4.05    | 14.09   |
|      | ≥ 35                         | 6.50                      | 4.91    | 9.51    |
|      | Inhabited city               |                           |         |         |
|      | Pearl River Delta region     | 5.13                      | 4.48    | 11.06   |
|      | Non-Pearl River Delta region | 3.43                      | 3.93    | 15.12   |
|      | Infant sex                   |                           |         |         |
|      | Boy                          | 4.51                      | 3.68    | 13.43   |
|      | Girl                         | 3.47                      | 4.63    | 14.01   |
|      | Season of birth              |                           |         |         |
|      | Spring                       | 4.02                      | 4.08    | 13.36   |
|      | Summer                       | 4.03                      | 4.33    | 14.59   |
|      | Autumn                       | 3.87                      | 4.19    | 14.24   |
|      | Winter                       | 4.20                      | 3.87    | 12.53   |
| 2016 | Maternal age (years)         |                           |         |         |
|      | < 35                         | 4.24                      | 3.98    | 12.40   |
|      | ≥ 35                         | 6.87                      | 4.88    | 8.50    |
|      | Inhabited city               |                           |         |         |
|      | Pearl River Delta region     | 5.28                      | 4.25    | 9.90    |
|      | Non-Pearl River Delta region | 3.82                      | 3.92    | 13.93   |
|      | Infant sex                   |                           |         |         |
|      | Boy                          | 5.02                      | 3.61    | 11.70   |
|      | Girl                         | 4.00                      | 4.62    | 12.23   |
|      | Season of birth              |                           |         |         |

|    |      |                              |      |       |
|----|------|------------------------------|------|-------|
| 1  |      |                              |      |       |
| 2  |      |                              |      |       |
| 3  |      | Spring                       | 4.49 | 4.02  |
| 4  |      | Summer                       | 4.66 | 4.29  |
| 5  |      | Autumn                       | 4.43 | 4.08  |
| 6  |      | Winter                       | 4.60 | 3.93  |
| 7  |      |                              |      | 11.76 |
| 8  |      |                              |      | 12.37 |
| 9  | 2017 | Maternal age (years)         |      | 12.01 |
| 10 |      | < 35                         | 3.67 | 4.11  |
| 11 |      | ≥ 35                         | 5.83 | 4.89  |
| 12 |      |                              |      | 10.05 |
| 13 |      | Inhabited city               |      |       |
| 14 |      | Pearl River Delta region     | 4.27 | 4.42  |
| 15 |      | Non-Pearl River Delta region | 3.82 | 4.08  |
| 16 |      |                              |      | 13.82 |
| 17 |      | Infant sex                   |      |       |
| 18 |      | Boy                          | 4.53 | 3.78  |
| 19 |      | Girl                         | 3.50 | 4.78  |
| 20 |      |                              |      | 13.13 |
| 21 |      | Season of birth              |      |       |
| 22 |      | Spring                       | 3.91 | 4.14  |
| 23 |      | Summer                       | 3.94 | 4.36  |
| 24 |      | Autumn                       | 3.98 | 4.46  |
| 25 |      | Winter                       | 4.36 | 4.04  |
| 26 |      |                              |      | 13.24 |
| 27 |      |                              |      | 12.57 |
| 28 |      |                              |      | 13.91 |
| 29 |      |                              |      | 14.23 |
| 30 |      |                              |      | 12.02 |
| 31 |      |                              |      |       |
| 32 |      |                              |      |       |
| 33 |      |                              |      |       |
| 34 |      |                              |      |       |
| 35 |      |                              |      |       |
| 36 |      |                              |      |       |
| 37 |      |                              |      |       |
| 38 |      |                              |      |       |
| 39 |      |                              |      |       |
| 40 |      |                              |      |       |
| 41 |      |                              |      |       |
| 42 |      |                              |      |       |
| 43 |      |                              |      |       |
| 44 |      |                              |      |       |
| 45 |      |                              |      |       |
| 46 |      |                              |      |       |
| 47 |      |                              |      |       |
| 48 |      |                              |      |       |
| 49 |      |                              |      |       |
| 50 |      |                              |      |       |
| 51 |      |                              |      |       |
| 52 |      |                              |      |       |
| 53 |      |                              |      |       |
| 54 |      |                              |      |       |
| 55 |      |                              |      |       |
| 56 |      |                              |      |       |
| 57 |      |                              |      |       |
| 58 |      |                              |      |       |
| 59 |      |                              |      |       |
| 60 |      |                              |      |       |

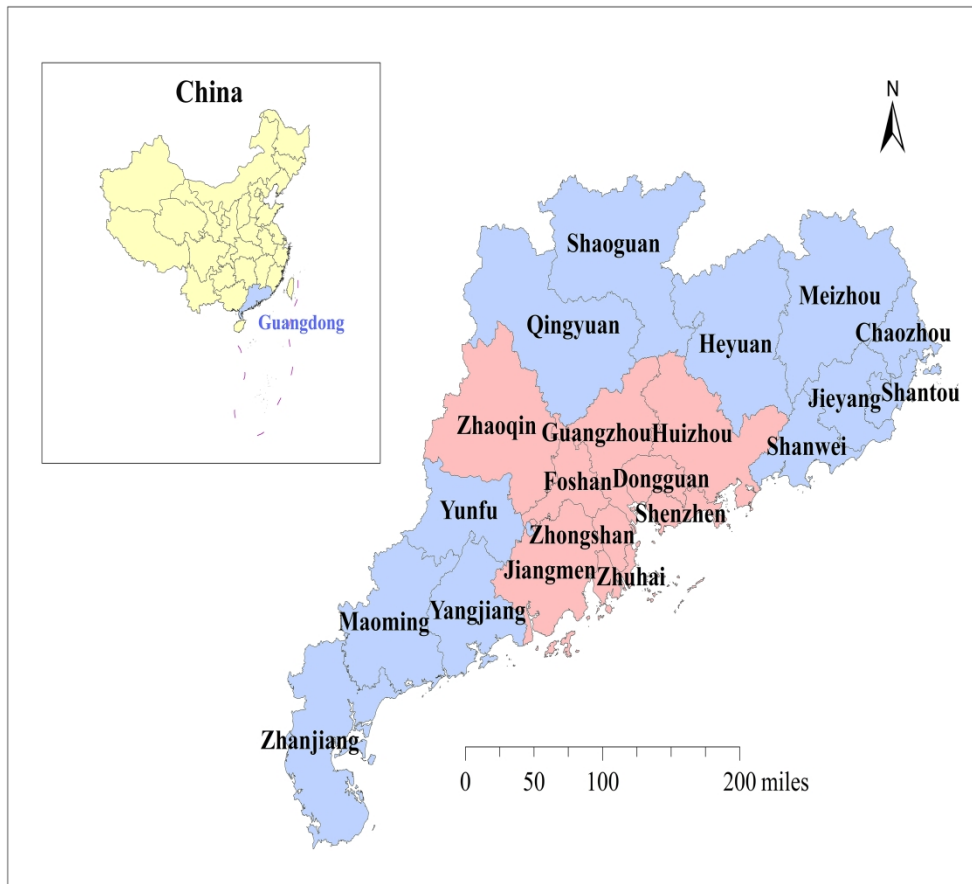

Fig 1

1  
2  
3  
4  
5  
6  
7  
8  
9  
10  
11  
12  
13  
14  
15  
16  
17  
18  
19  
20  
21  
22  
23  
24  
25  
26  
27  
28  
29  
30  
31  
32  
33  
34  
35  
36  
37  
38  
39  
40  
41  
42  
43  
44  
45  
46  
47  
48  
49  
50  
51  
52  
53  
54  
55  
56  
57  
58  
59  
60

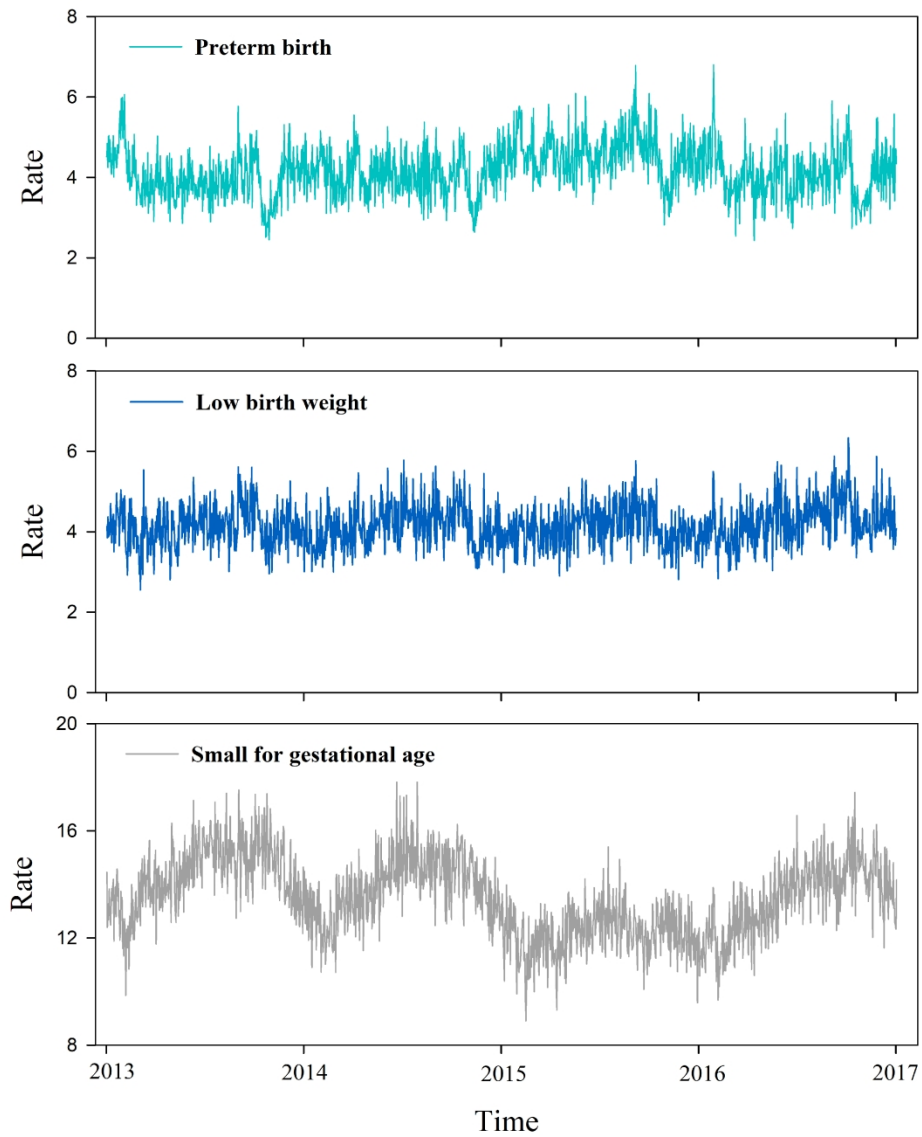

Fig 2

1  
2  
3  
4  
5  
6  
7  
8  
9  
10  
11  
12  
13  
14  
15  
16  
17  
18  
19  
20  
21  
22  
23  
24  
25  
26  
27  
28  
29  
30  
31  
32  
33  
34  
35  
36  
37  
38  
39  
40  
41  
42  
43  
44  
45  
46  
47  
48  
49  
50  
51  
52  
53  
54  
55  
56  
57  
58  
59  
60

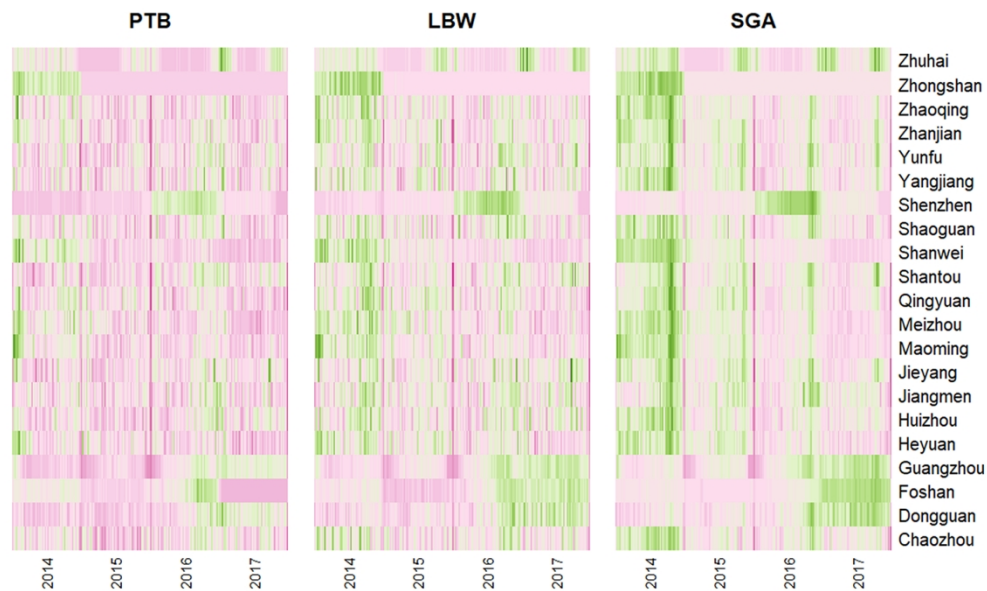

Fig 3



1  
2  
3  
4  
5  
6  
7  
8  
9  
10  
11  
12  
13  
14  
15  
16  
17  
18  
19  
20  
21  
22  
23  
24  
25  
26  
27  
28  
29  
30  
31  
32  
33  
34  
35  
36  
37  
38  
39  
40  
41  
42  
43  
44  
45  
46  
47  
48  
49  
50  
51  
52  
53  
54  
55  
56  
57  
58  
59  
60

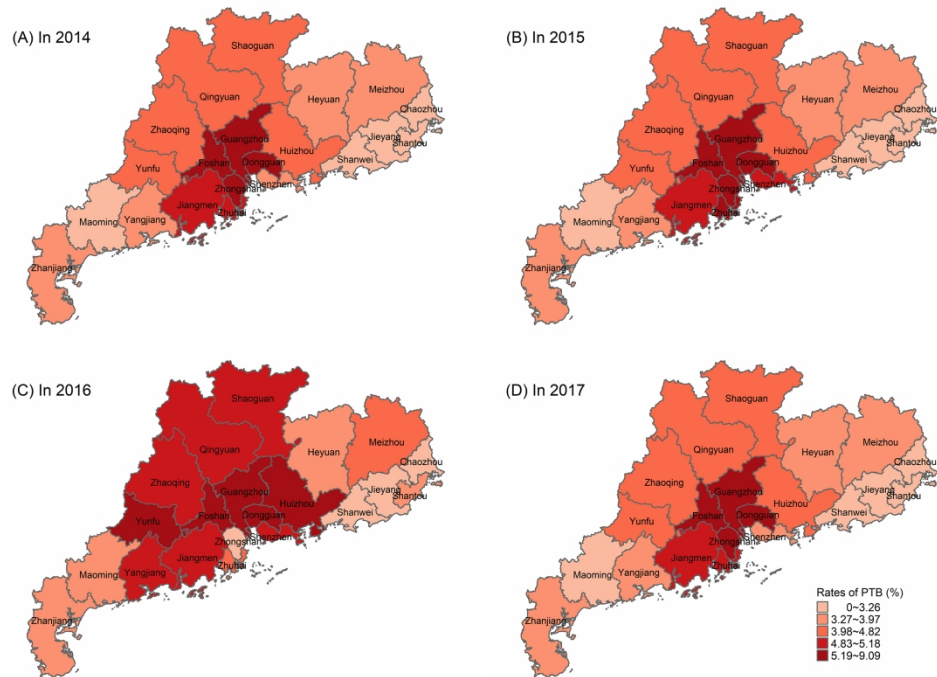

Fig 4

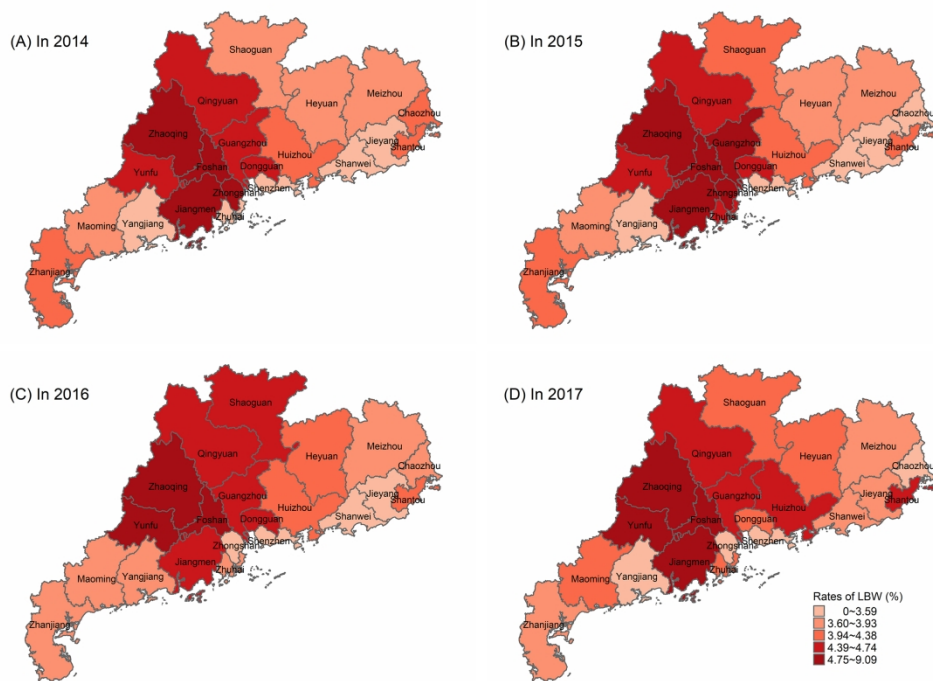

Fig 5

1  
2  
3  
4  
5  
6  
7  
8  
9  
10  
11  
12  
13  
14  
15  
16  
17  
18  
19  
20  
21  
22  
23  
24  
25  
26  
27  
28  
29  
30  
31  
32  
33  
34  
35  
36  
37  
38  
39  
40  
41  
42  
43  
44  
45  
46  
47  
48  
49  
50  
51  
52  
53  
54  
55  
56  
57  
58  
59  
60

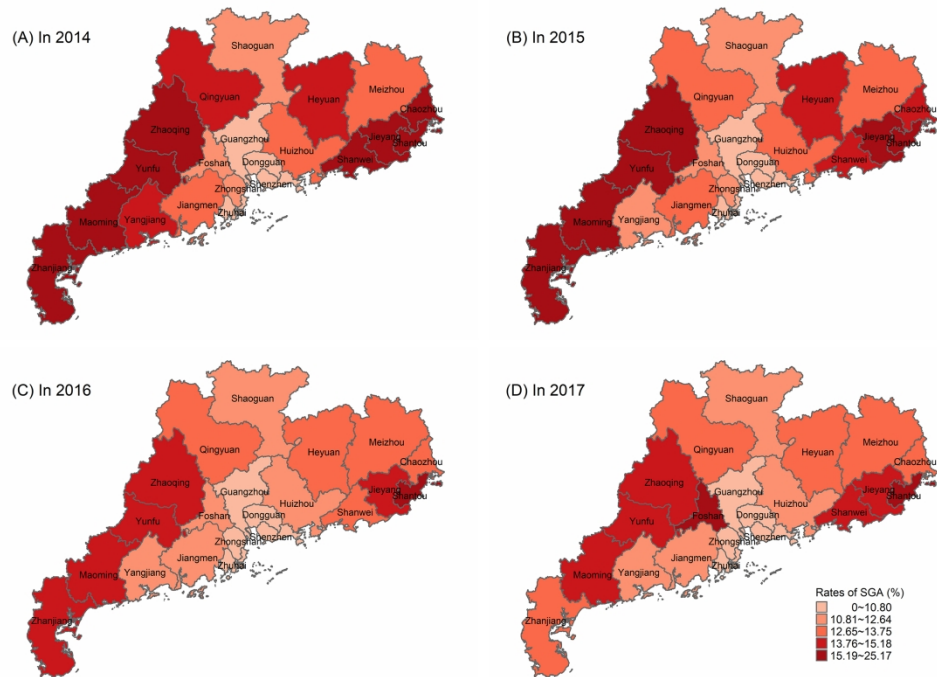

Fig 6

STROBE Statement—Checklist of items that should be included in reports of *cross-sectional studies*

|                              | Item No | Recommendation                                                                                                                                                                                               | Page No |
|------------------------------|---------|--------------------------------------------------------------------------------------------------------------------------------------------------------------------------------------------------------------|---------|
| <b>Title and abstract</b>    | 1       | (a) Indicate the study's design with a commonly used term in the title or the abstract                                                                                                                       | 1       |
|                              |         | (b) Provide in the abstract an informative and balanced summary of what was done and what was found                                                                                                          | 2       |
| <b>Introduction</b>          |         |                                                                                                                                                                                                              |         |
| Background/rationale         | 2       | Explain the scientific background and rationale for the investigation being reported                                                                                                                         | 4       |
| Objectives                   | 3       | State specific objectives, including any prespecified hypotheses                                                                                                                                             | 5       |
| <b>Methods</b>               |         |                                                                                                                                                                                                              |         |
| Study design                 | 4       | Present key elements of study design early in the paper                                                                                                                                                      | 5       |
| Setting                      | 5       | Describe the setting, locations, and relevant dates, including periods of recruitment, exposure, follow-up, and data collection                                                                              | 5       |
| Participants                 | 6       | (a) Give the eligibility criteria, and the sources and methods of selection of participants                                                                                                                  | 5       |
| Variables                    | 7       | Clearly define all outcomes, exposures, predictors, potential confounders, and effect modifiers. Give diagnostic criteria, if applicable                                                                     | 6       |
| Data sources/<br>measurement | 8*      | For each variable of interest, give sources of data and details of methods of assessment (measurement). Describe comparability of assessment methods if there is more than one group                         | 6       |
| Bias                         | 9       | Describe any efforts to address potential sources of bias                                                                                                                                                    | 6       |
| Study size                   | 10      | Explain how the study size was arrived at                                                                                                                                                                    | 6       |
| Quantitative variables       | 11      | Explain how quantitative variables were handled in the analyses. If applicable, describe which groupings were chosen and why                                                                                 | 6       |
| Statistical methods          | 12      | (a) Describe all statistical methods, including those used to control for confounding                                                                                                                        | 6,7     |
|                              |         | (b) Describe any methods used to examine subgroups and interactions                                                                                                                                          |         |
|                              |         | (c) Explain how missing data were addressed                                                                                                                                                                  |         |
|                              |         | (d) If applicable, describe analytical methods taking account of sampling strategy                                                                                                                           | 6       |
|                              |         | (e) Describe any sensitivity analyses                                                                                                                                                                        |         |
| <b>Results</b>               |         |                                                                                                                                                                                                              |         |
| Participants                 | 13*     | (a) Report numbers of individuals at each stage of study—eg numbers potentially eligible, examined for eligibility, confirmed eligible, included in the study, completing follow-up, and analysed            | 7       |
|                              |         | (b) Give reasons for non-participation at each stage                                                                                                                                                         |         |
|                              |         | (c) Consider use of a flow diagram                                                                                                                                                                           |         |
| Descriptive data             | 14*     | (a) Give characteristics of study participants (eg demographic, clinical, social) and information on exposures and potential confounders                                                                     | 7       |
|                              |         | (b) Indicate number of participants with missing data for each variable of interest                                                                                                                          |         |
| Outcome data                 | 15*     | Report numbers of outcome events or summary measures                                                                                                                                                         | 7-9     |
| Main results                 | 16      | (a) Give unadjusted estimates and, if applicable, confounder-adjusted estimates and their precision (eg, 95% confidence interval). Make clear which confounders were adjusted for and why they were included |         |

|                          |    |                                                                                                                                                                            |      |
|--------------------------|----|----------------------------------------------------------------------------------------------------------------------------------------------------------------------------|------|
|                          |    | (b) Report category boundaries when continuous variables were categorized                                                                                                  |      |
|                          |    | (c) If relevant, consider translating estimates of relative risk into absolute risk for a meaningful time period                                                           |      |
| Other analyses           | 17 | Report other analyses done—eg analyses of subgroups and interactions, and sensitivity analyses                                                                             |      |
| <b>Discussion</b>        |    |                                                                                                                                                                            |      |
| Key results              | 18 | Summarise key results with reference to study objectives                                                                                                                   | 9-12 |
| Limitations              | 19 | Discuss limitations of the study, taking into account sources of potential bias or imprecision. Discuss both direction and magnitude of any potential bias                 | 12   |
| Interpretation           | 20 | Give a cautious overall interpretation of results considering objectives, limitations, multiplicity of analyses, results from similar studies, and other relevant evidence | 12   |
| Generalisability         | 21 | Discuss the generalisability (external validity) of the study results                                                                                                      |      |
| <b>Other information</b> |    |                                                                                                                                                                            |      |
| Funding                  | 22 | Give the source of funding and the role of the funders for the present study and, if applicable, for the original study on which the present article is based              | 13   |

\*Give information separately for exposed and unexposed groups.

**Note:** An Explanation and Elaboration article discusses each checklist item and gives methodological background and published examples of transparent reporting. The STROBE checklist is best used in conjunction with this article (freely available on the Web sites of PLoS Medicine at <http://www.plosmedicine.org/>, Annals of Internal Medicine at <http://www.annals.org/>, and Epidemiology at <http://www.epidem.com/>). Information on the STROBE Initiative is available at [www.strobe-statement.org](http://www.strobe-statement.org).

# BMJ Open

## Adverse birth outcomes in Guangdong province, China, 2014-2017: a spatio-temporal analysis of 2.9 million births

|                                 |                                                                                                                                                                                                                                                                                                                                                                                                                                                                                                                                                                                                                                                                                                                                                                                                                                                                                                 |
|---------------------------------|-------------------------------------------------------------------------------------------------------------------------------------------------------------------------------------------------------------------------------------------------------------------------------------------------------------------------------------------------------------------------------------------------------------------------------------------------------------------------------------------------------------------------------------------------------------------------------------------------------------------------------------------------------------------------------------------------------------------------------------------------------------------------------------------------------------------------------------------------------------------------------------------------|
| Journal:                        | <i>BMJ Open</i>                                                                                                                                                                                                                                                                                                                                                                                                                                                                                                                                                                                                                                                                                                                                                                                                                                                                                 |
| Manuscript ID                   | bmjopen-2019-030629.R1                                                                                                                                                                                                                                                                                                                                                                                                                                                                                                                                                                                                                                                                                                                                                                                                                                                                          |
| Article Type:                   | Original research                                                                                                                                                                                                                                                                                                                                                                                                                                                                                                                                                                                                                                                                                                                                                                                                                                                                               |
| Date Submitted by the Author:   | 30-Aug-2019                                                                                                                                                                                                                                                                                                                                                                                                                                                                                                                                                                                                                                                                                                                                                                                                                                                                                     |
| Complete List of Authors:       | Miao, Huazhang; Guangdong Women and Children Hospital, Department of Healthcare<br>Li, Wu; Guangdong Women and Children Hospital, Department of Healthcare<br>Li, Bing; Guangdong Women and Children Hospital<br>Yao, Fei; Guangdong Women and Children Hospital, Department of Healthcare<br>Chen, Ruyin; Shantou University Medical College, Department of Clinical Medicine<br>Chen, Yuliang; Shantou University Medical College, Department of Preventive Medicine<br>Lin, Jiumin; Second Affiliated Hospital of Shantou University Medical College, Department of Hepatology and Infectious Diseases<br>Wu, Yuntao; Guangdong Women and Children Hospital, Department of Healthcare<br>Guo, Pi; Shantou University Medical College, Department of Public Health<br>Zhao, Qingguo; Family Planning Research Institute of Guangdong Province, National Health and Family Planning Commission |
| <b>Primary Subject Heading</b>: | Public health                                                                                                                                                                                                                                                                                                                                                                                                                                                                                                                                                                                                                                                                                                                                                                                                                                                                                   |
| Secondary Subject Heading:      | Paediatrics                                                                                                                                                                                                                                                                                                                                                                                                                                                                                                                                                                                                                                                                                                                                                                                                                                                                                     |
| Keywords:                       | PUBLIC HEALTH, EPIDEMIOLOGY, Community child health < PAEDIATRICS                                                                                                                                                                                                                                                                                                                                                                                                                                                                                                                                                                                                                                                                                                                                                                                                                               |
|                                 |                                                                                                                                                                                                                                                                                                                                                                                                                                                                                                                                                                                                                                                                                                                                                                                                                                                                                                 |

SCHOLARONE™  
Manuscripts

---

## Adverse birth outcomes in Guangdong province, China, 2014-2017: a spatio-temporal analysis of 2.9 million births

### Authors

Huazhang Miao <sup>1, †</sup>, Li Wu <sup>1, †</sup>, Bing Li <sup>1, †</sup>, Fei Yao <sup>1, †</sup>, Ruyin Chen <sup>2</sup>, Yuliang Chen <sup>3</sup>, Jiumin Lin <sup>4</sup>, Yuntao Wu <sup>1</sup>, Pi Guo <sup>3, \*</sup>, Qingguo Zhao <sup>5, \*</sup>

<sup>1</sup> Department of Healthcare, Guangdong Women and Children Hospital, Guangzhou, 511442, China

<sup>2</sup> Department of Clinical Medicine, Shantou University Medical College, Shantou 515041, China

<sup>3</sup> Department of Preventive Medicine, Shantou University Medical College, Shantou 515041, China

<sup>4</sup> Department of Hepatology and Infectious Diseases, the Second Affiliated Hospital, Shantou University Medical College, Shantou 515041, China

<sup>5</sup> Epidemiological Research Office of Key Laboratory of Male Reproduction and Genetics (National Health and Family Planning Commission), Family Planning Research Institute of Guangdong Province, Guangzhou 510600, China

† These authors contributed equally to this paper and they are co-first authors.

\* Pi G. (Email: pguo@stu.edu.cn) and Qingguo Z. (Email: zqgfrost@126.com) contributed equally to this paper and they are co-senior authors.

The manuscript word counts 3513 words.

---

## Abstract

**Objectives** Adverse birth outcomes pose a great threat to the public health and bring a heavy burden of disease in China. A comprehensive examination of the temporal and spatial trends of preterm birth (PTB), low birth weight (LBW), and small for gestational age (SGA) epidemics can provide some elementary information for subsequent etiological and epidemiological studies. This study aimed to characterize the spatio-temporal features of PTB, LBW, and SGA based on a large cohort of live births in China.

**Design** Spatio-temporal descriptive analysis was performed in Guangdong province, China, from 2014 to 2017.

**Setting** Data involving 2,917,098 live births in Guangdong province, China from 2014 to 2017 was collected from Guangdong Birth Certificate System. Information was collected, including the date of birth, gestational age in week, birth weight, sex of the infant, age of the mother, and registered residence of the mother.

**Results** The estimated rate of PTB, LBW and SGA was 4.16%, 4.14% and 12.86%, respectively. For temporal trends, the rates of PTB, LBW and SGA showed seasonal fluctuations, especially for LBW and SGA. In addition, there were regional differences in the rates of PTB, LBW and SGA between the Pearl River Delta and Non-Pearl River Delta regions. From 2014 to 2017, the high rates of PTB and LBW expanded from the Pearl River Delta region to the Non-Pearl River Delta regions. However, compared with the Pearl River Delta region, the rate of SGA was higher in the Non-Pearl River Delta regions on the whole.

**Conclusion** The findings of this study contribute to the understanding of the etiology and epidemiology of PTB, LBW and SGA in south China.

**Keywords:** Preterm birth; Low birth weight; Small for gestational age; Spatial; Temporal



---

### Strengths and limitations of this study

- This study is a spatio-temporal descriptive analysis to reveal the current situation of adverse birth outcomes in Guangdong, south China.
- The study involves a cohort of nearly 2.9 million live births and further enhances our understanding of the temporal trend and spatial distribution of adverse pregnancy outcomes in south China.
- Multiple adverse pregnancy outcomes including preterm birth, low birth weight, and small for gestational age have been investigated and compared in terms of their temporal trend and spatial distribution.
- As a descriptive analysis, this study was unable to identify the causal relationship between spatio-temporal factors and adverse pregnancy outcomes.
- Delays in reporting birth certificate data at small hospitals in different cities may cause bias.

---

## Introduction

Previous studies <sup>1, 2</sup> suggested that severe infant morbidity and mortality partly resulted from adverse birth outcomes including preterm birth (PTB), low birth weight (LBW) and small for gestational age (SGA). PTB is defined as a live-birth infant with less than 37 complete weeks of gestation <sup>3</sup>. LBW is defined as a live-birth infant weighing less than 2,500 grams at birth <sup>4</sup>. SGA is defined as an infant whose birth weight falls below the 10th percentile by sex and gestational week of all singleton live births in a region <sup>5</sup>. With the development and progress of society and the continuous improvement of the level of medical care, the health condition of infants and young children has been significantly improved. However, adverse pregnancy outcomes such as PTB, LBW and SGA have not been effectively controlled, which has become an important risk factor for infant health. PTB rates were reported ranging from 6.2 % to 11.9% of live births in some developed and developing countries <sup>6</sup>. In fact, the incidence of LBW in developed countries is still high, and even rising <sup>7</sup>. Among 135 million infants born in low and middle income countries in 2010, it is estimated that 29.7 million (22%) were term births of SGA, and 2.8 million (2.1%) were PTBs of SGA <sup>8</sup>. In Guangzhou city of south China, a PTB rate of 5.6% has been reported in a previous study <sup>9</sup>. A retrospective study involving 39 hospitals of different levels from 14 provinces and autonomous regions in China throughout 2011 reported that a total of 7474 cases were diagnosed as LBW (incidence = 7.2%) <sup>10</sup>. Overall, these adverse birth outcomes pose a great threat to the health of infants.

Additionally, the adverse outcomes of PTB, LBW and SGA may also increase the risk of chronic diseases or developmental outcomes later in life <sup>11, 12</sup>. These facts show that PTB, LBW and SGA are still challenging problems of public health in many countries. Thus further research is needed to investigate the epidemiology of these problems more comprehensively. Many previous studies described significant seasonal variations of PTB, LBW or SGA with remarkable differences between regions <sup>13, 14</sup>. However, some researches didn't detect an association between temperature and adverse pregnancy outcome <sup>15-17</sup>. In fact, the conditions of evidence differed among

1  
2  
3  
4 different regions and studies. The complexity of PTB, LBW, SGA and relevant risk  
5 factors in the individual, social and spatial levels often make the causal relationship  
6 between identified risks and responses non-stationary in space and time. A  
7 comprehensive examination of the temporal and spatial trends of PTB, LBW, and  
8 SGA can provide some basic elements for subsequent etiological and epidemiological  
9 studies.  
10  
11  
12  
13  
14  
15  
16

17 As the southern gate of China, Guangdong province has the most developed economic  
18 and social level in South China. However, there are still regional differences in the  
19 industrial development, the degree of medical care and the level of education of the  
20 local residents that cannot be ignored. These factors may have an impact on the  
21 fertility status of local residents in Guangdong province. In addition, more recent data  
22 about the fertility status of local residents have not been reported. There is an urgent  
23 need to provide an overall description of the fertility situation of the local population  
24 in order to carry out some other follow-up exploratory studies. Therefore, in order to  
25 fill in the gap, we performed a spatio-temporal analysis of PTB, LBW, and SGA,  
26 based on a large cohort involving approximately 3 million newborns in Guangdong  
27 province, China from 2014 to 2017. This study is more convincing because of the  
28 relatively large investigated samples. Additionally, this study analyzed regional  
29 differences of PTB, LBW and SGA between the Pearl River Delta and Non-Pearl  
30 River Delta regions. In general, the Pearl River Delta regions represent economically  
31 developed regions in Guangdong province, while Non-Pearl River Delta regions  
32 represent relatively underdeveloped regions. The findings of this study will contribute  
33 to the understanding of the etiology and epidemiology of PTB, LBW and SGA, and  
34 the design of prevention and intervention strategies for specific geographical areas  
35 and high-risk populations.  
36  
37  
38  
39  
40  
41  
42  
43  
44  
45  
46  
47  
48  
49  
50  
51  
52  
53  
54  
55

## 56 **Materials and methods**

### 57 **Patient and public involvement**

58 All birth data in this study was obtain from Guangdong Birth Certificate System and  
59  
60

1  
2  
3  
4 was only used for statistical analysis. Information of newborn and mothers across  
5 Guangdong province were collected in this study. No patients or public were involved  
6 in development of research question, study design, conduction of research and  
7 measurement of outcome. There are no plans of disseminating research results to  
8 participants.  
9  
10  
11  
12

### 13 14 15 **Ethics statement**

16 Ethical approval was obtained from ethics committee of Guangdong Woman and  
17 Children Hospital. The approval number is 201601011.  
18  
19  
20  
21  
22

### 23 **Data preparation**

24 All birth data was collected from the Guangdong Birth Certificate System, which  
25 collects information of infants and young children from medical institutions in  
26 Guangdong province. After childbirth, obstetric medical staff put the baby on an  
27 electronic scale, record stable weight data. Health care workers or midwives fill out  
28 the delivery information of the newborn in the regional maternal and child  
29 information system. The logical settings of the system have been corrected to ensure  
30 the convincing records. Finally, the information will be transferred to the Guangdong  
31 Birth Certificate System. After the data being imported, the midwife director and the  
32 hospital doctor director need to confirm the birth information. Before the birth  
33 certificate is issued, the department of medical management and the parents should  
34 check the birth information again. All the information is verified by medical  
35 professionals. The birth registration database contains the date of birth, gestational  
36 age in week, birth weight, sex of the infant, parity, age of the mother, and registered  
37 residence of the mother. All live newborns were included in the study except for  
38 stillbirths, deaths within days of birth and birth defects. To reduce bias, the subset of  
39 births was limited to singleton live births with 22-42 completed weeks gestation <sup>18</sup>.  
40 After further excluding births with implausible birth weights (less than 500 grams) <sup>19</sup>  
41 and verifying data, we included a total number of 2,914,198 births in our analysis.  
42  
43  
44  
45  
46  
47  
48  
49  
50  
51  
52  
53  
54  
55  
56  
57  
58  
59  
60

---

## Data analysis

We described basic characteristics of the newborns and mothers, and the rates of PTB, LBW and SGA according to the studied characteristics by year was estimated and compared using  $\chi^2$  test. In order to observe the temporal trends in the occurrence of PTB, LBW and SGA in the study site, we calculated daily rates of PTB (daily number of live births with gestational age less than 37 weeks/daily number of live births  $\times$  100%)<sup>3</sup>, daily rates of LBW (daily number of live births with birth weight less than 2500 g / daily number of live births  $\times$  100%)<sup>4</sup>, daily rates of SGA (daily number of live births with birth weight less than the 10th percentile of the normal average birth weight at the same gestational age/daily number of live births at the same gestational age  $\times$  100%)<sup>20</sup>, respectively. We determined the season of birth based on the birth date (spring: March-May, summer: June-August; autumn: September-November, winter: December-February). Heatmaps of weekly average rates of PTB, LBW and SGA were drew to investigate whether the rates exhibited an obvious seasonality. SAS software version 9.3 (SAS Institute Inc.; Cary, NC, the United States) was used for the statistical analyses.

According to economic conditions, Guangdong province can be divided into Pearl River Delta regions and Non-Pearl River Delta regions. Pearl River Delta regions are economically developed regions, including Guangzhou, Shenzhen, Foshan, Dongguan, Zhuhai, Zhongshan, Zhaoqing, Huizhou and Jiangmen cities. By contrast, Non-Pearl River Delta regions are relatively underdeveloped regions, including Shantou, Chaozhou, Jieyang, Shanwei, Zhanjiang, Maoming, Yangjiang, Yunfu, Shaoguan, Qingyuan, Meizhou and Heyuan cities. Besides, city boundary shape files of Guangdong province were publicly obtained from the National Geomatics Center of China (<http://www.ngcc.cn/ngcc/>) and used for disease mapping. We mapped the spatial distributions of rates for the adverse birth outcomes to investigate the spatial distributions pattern of the birth outcomes through 2014 to 2017. In addition, we calculated the Kulldorff's spatial scan statistic using the DCluster package within R software for purely spatial cluster detection of the adverse birth outcomes. All

1  
2  
3  
4 statistical tests were 2-tailed. *P*-value less than 0.05 were considered to be statistically  
5 significant.  
6  
7

## 8 9 **Results**

10  
11 Figure 1 shows the geographical locations of the study in Guangdong province.  
12 Guangdong province is located in southern China and is also currently the most  
13 populous province in China. There were a total of 2,917,098 births in Guangdong  
14 province during the study period, 1,553,948 (53.27%) were boys. Approximately 22%  
15 (627,146) babies were born in 2015, which is the lowest population of all births  
16 between 2014 and 2017. As illustrated in Table 1, the proportion of mothers who aged  
17 less than 20, 20 to 24, 25 to 29, 30 to 34, and over 35 years old was 2.68%, 22.78%,  
18 39.87%, 23.38% and 11.29%, respectively. For the seasons of birth, the proportion of  
19 babies born in spring, summer, autumn and winter was 23.16%, 24.61%, 27.57% and  
20 24.66%, respectively. There were 56,748 (42.96%) LBW of preterm births, while  
21 there were 63,968 (52.93%) LBW of term births. Regarding SGA infants, 2.47% were  
22 preterm births, while 97.53% were term births.  
23  
24  
25  
26  
27  
28  
29  
30  
31  
32  
33  
34  
35

36 Table 2 reveals that the rates of PTB, LBW and SGA according to demographic  
37 characteristics, residence address and birth seasons by year. Infants born from women  
38 aged less than 35 years have higher rates of LBW and PTB outcomes than women  
39 younger than 35 years old (all *P*-values < 0.05). However, the rates of the difference  
40 were gradually decreasing from 2014 to 2017. From 2014 to 2016, there was a  
41 downward trend in the rates of SGA among pregnant women who were not less than  
42 35 years old and less than 35 years old. In 2017, the rates for SGA by two groups of  
43 pregnant women rose slightly. Generally, infants who were born in the Pearl River  
44 Delta regions had higher rates of PTB and LBW than those who were born in  
45 Non-Pearl River Delta regions in Guangdong (all *P*-values < 0.05). However, infants  
46 who were born in the Pearl River Delta regions tended to have lower rates of SGA  
47 than those who were born in Non-Pearl River Delta regions (all *P*-values < 0.05). Boy  
48 and girl babies tended to be similar in the rates of the outcomes. We found the PTB  
49  
50  
51  
52  
53  
54  
55  
56  
57  
58  
59  
60

1  
2  
3  
4 rates of boys were higher than that of girls (all  $P$ -values  $< 0.05$ ), among which the  
5 highest rate was in 2016 (5.02%). Besides, the LBW rates of girls were higher than  
6 that of boys (all  $P$ -values  $< 0.05$ ), among which the highest rate was in 2017 (4.78%).  
7 For SGA, the highest rate was 14.46% in the girls group. In addition, the rates of PTB,  
8 LBW and SGA statistically varied among seasons of birth, respectively (all  $P$ -values  
9  $< 0.05$ ). For PTB, the highest rates were clustered in winter. For LBW, the highest  
10 rates did not show cluster tendency of season. However, for SGA, the highest rates  
11 were clustered in summer or autumn.  
12  
13  
14  
15  
16  
17  
18  
19  
20

21 Figure 2 depicts daily time-series plots of the rates for the adverse pregnancy  
22 outcomes including PTB, LBW and SGA. Upon visual inspection, the rates of PTB,  
23 LBW and SGA show, to some degree, seasonal fluctuation trends, especially for the  
24 outcomes of PTB and SGA. In 2014, the rate of PTB ranged from 2.45% in October  
25 to 6.06% in February. The period of highest rates of PTB was between December and  
26 February. In 2015 and 2016, the rates of PTB in November were the lowest in the  
27 course of the year. In contrast, in 2016 and 2017, the highest rates of PTB were in  
28 October. In 2014, infants had a peak rate (5.61%) of LBW in September. Infants born  
29 from February to April were least likely to suffer from LBW, with the lowest rate  
30 (2.55%) in March. In 2017, there was a similar pattern for LBW infants with the rate  
31 (2.80%) in February, which clearly lower than the figure between September and  
32 October. Additionally, the peak rate (6.30%) of LBW occurred in October. The  
33 average of daily rates of SGA was 14.30% in this study. During the period from 2014  
34 to 2017, infants were least likely to suffer from SGA between January and March,  
35 which is similar to the outcome of LBW. In addition, infants were most likely to  
36 suffer from SGA between September and October.  
37  
38  
39  
40  
41  
42  
43  
44  
45  
46  
47  
48  
49  
50  
51  
52  
53

54 Figure 3 depicts the heatmaps of weekly average rates for PTB, LBW and SGA across  
55 cities in Guangdong province, from 2014 to 2017. For most cities, there was a  
56 remarkable seasonality in the rates of the adverse pregnancy outcomes, especially for  
57 LBW and SGA.  
58  
59  
60



1  
2  
3  
4  
5  
6  
7  
8  
9  
10  
11  
12  
13  
14  
15  
16  
17  
18  
19  
20  
21  
22  
23  
24  
25  
26  
27  
28  
29  
30  
31  
32  
33  
34  
35  
36  
37  
38  
39  
40  
41  
42  
43  
44  
45  
46  
47  
48  
49  
50  
51  
52  
53  
54  
55  
56  
57  
58  
59  
60

---

Figure 4 shows the spatial distributions of PTB rates, as expressed in per 100 persons, in Guangdong, from 2014 to 2017. The figure revealed that the rates of PTB were relatively high in the Pearl River Delta regions. For the years of 2014 and 2015, the highest rates of PTB were in Zhongshan and Foshan cities, located in Pearl River Delta regions. In 2016, the city of Foshan had the highest rate of PTB. Additionally, we observed that Yunfu which was located near the Pearl River Delta region had a distinctly high rate of PTB in 2016. In 2017, the city of Zhongshan has the highest rate of PTB. We observed spatial heterogeneity of PTB outcome across the study time period in Guangdong province (Fig S1 and Table S1), and the most likely cluster appearing in the Pearl River Delta was detected.

Similarly, the spatial heterogeneity of LBW and SGA was also observed in Guangdong province (Fig S2, Fig S3 and Table S1). Figure 5 and 6 depict the maps of spatial distributions of rates for LBW and SGA in Guangdong, respectively. In the years of 2014 and 2015, the rates of LBW were relatively high in the cities including Zhongshan, Foshan, Dongguan and Guangzhou in Pearl River Delta regions. In 2016, the rates of LBW were relatively high in Guangzhou, Huizhou, Dongguan and Foshan. In 2017, the rates of LBW were relatively high in Zhongshan, Huizhou, and Guangzhou in the Pearl River Delta region. For the outcomes of SGA, the cities including Shantou, Zhaoqing, and Yunfu had higher rates than other cities from 2014 to 2017. In addition, the rate of SGA in Foshan was also high in 2017.

## Discussion

Our study analyzed a total number of 2,917,098 live births to reveal the characteristics of the temporal trends and spatial distributions of PTB, LBW and SGA in Guangdong province from 2014 to 2017. This study reveals the overall situation and regional differences of fertility among local residents in Guangdong province, and provides more recent data about the reproductive status of local pregnant women. These findings will be beneficial to subsequently explore on the causes of differences in the



fertility in Guangdong province.

For PTB, Beck et al. <sup>6</sup> reported in a systematic review that 9.6% were preterm births among 12.9 million births worldwide in 2005. A study estimated 14.9 million babies were preterm births in 2010, accounting for 11.1% of all live births worldwide, ranging from about 5% in several European countries to 18% in some African countries <sup>21</sup>. A study revealed that PTB rate was around 4.75% among 10 counties and cities in China, based on Perinatal Healthcare Surveillance System from 1993 to 2005 <sup>22</sup>. As the United Nations International Children's Emergency Fund (UNICEF) announced in 2007, the rates of LBW in China were still lower than those of some developed countries, such as the United States (8%), Australia (7%), the United Kingdom (8%), Canada (6%), and Japan (8%) <sup>10</sup>. However, the rate of LBW in China was slightly higher than the figure in South Korea (4%). According to a survey covering 14 provinces in China, the LBW rate in 1998 was 5.87%, and it decreased to 4.6% in 2006 <sup>23</sup>. For the worldwide rates of SGA, a previous study showed the rates were relatively high in Cambodia (18.8%), Nepal (17.9%), the Occupied Palestinian Territory (16.1%) and Japan (16.0%), while rates were relatively low in Afghanistan (4.8%), Uganda (6.6%) and Thailand (9.7%) <sup>12</sup>. In addition, a recent cross-sectional population-based study revealed that the rate of SGA was 12.93% from January 1, 2017 to October 31, 2017 in southern China <sup>24</sup>. However, the study was based on a relatively small size of data. Our study, based on a large size of data, revealed that the rates of PTB, LBW and SGA in Guangdong province were relatively low, compared with other countries in the world.

The data represents statistically significant seasonal variations of births and adverse birth outcomes in Guangdong province, China. Seasonal patterns of birth outcomes were not consistent, which may reflect different etiologies and risk factors of time for each of the examined birth outcomes. For the rates of PTB, the highest number almost occurred in winter. Besides, for SGA, the highest rates were in summer or autumn from 2014 to 2017. Studies in developed countries such as Greece <sup>25</sup>, Atlanta <sup>26</sup> and

1  
2  
3  
4 South Korea <sup>27</sup> revealed that PTB has a seasonal trend. LBW was also found seasonal  
5 trends <sup>28</sup>. A study revealed that PTB and SGA showed divergent patterns of  
6 seasonality in rural African community <sup>29</sup>. Seasonality of PTB, LBW and SGA was  
7 also found in Nepal. Our study indicated that the rate of PTB in November was the  
8 lowest in 2015 and 2016, while the rate in October was the highest in 2016 and 2017.  
9 Hughes et. al <sup>30</sup> also found infants were least likely to suffer from SGA from January  
10 to March. In contrast, Infants were most likely to suffer from SGA from June to  
11 August and in November. In our study, the rates of SGA peaked in the time period  
12 between September and October, and the rates were relatively low from January to  
13 March. In some countries, it was also reported that PTB had an obvious seasonal trend.  
14 In London <sup>31</sup>, babies born in winter were more likely to suffer from PTB compared  
15 with those born in spring. In Gambia <sup>29</sup>, the rates of PTB peaked twice in a year, once  
16 in the hunger season in July and once in October. However, a previous study from the  
17 United States reported no seasonality in the rates of PTB <sup>32</sup>. We speculate that the  
18 inconsistent results from different countries were partly due to the differences in the  
19 study population related to geography, culture and socio-economics. Environmental  
20 factors including temperature, humidity, and sunlight have been associated with birth  
21 outcomes. According to an animal model, a biological explanation for increasing the  
22 risk of PTB is that high temperatures increase the chances of dehydration <sup>33</sup>. This  
23 effect increases the risk of PTB due to decreased uterine blood flow and increased  
24 secretion of prostaglandins and oxytocin. Another hypothesis is that the effect of  
25 sunlight on vitamin D levels may affect fetal growth <sup>34</sup>. A study indicated that  
26 seasonal patterns are potential representatives of various environmental exposures <sup>35</sup>.

27  
28  
29  
30  
31  
32  
33  
34  
35  
36  
37  
38  
39  
40  
41  
42  
43  
44  
45  
46  
47  
48  
49  
50  
51 In terms of spatial factors, the PTB, LBW and SGA rates in the Pearl River Delta  
52 region were significantly different from those in the non-Pearl River Delta region. A  
53 regional analysis in Japan revealed that incidence of PTB was 3.2% in coastal areas  
54 and 5.0% in inland areas, respectively, and the incidence of LBW was 6.5% in the  
55 coastal areas and 8.5% in the inland areas <sup>36</sup>. Our results of geographical distributions  
56 of the adverse pregnancy outcomes were basically consistent with the results from  
57  
58  
59  
60

1  
2  
3  
4 Brazilian regions, in which a higher LBW rates were observed in the developed  
5 regions compared with less developed regions<sup>37</sup>. Overall, from 2014 to 2017, the high  
6 rates of PTB and LBW expanded from the Pearl River Delta region to the Non-Pearl  
7 River Delta regions. The trend of LBW rates increased in less developed areas of  
8 Guangdong province year by year. Previous studies also suggested that PTB is often  
9 associated with LBW, and their risk factors are similar<sup>38, 39</sup>. Our study indicated that  
10 the rates of SGA in the non-Pearl River Delta regions were generally higher than the  
11 Pearl River Delta regions. Previous study suggested that adverse pregnancy outcomes  
12 can be increased by preconception risk factors and lifestyles<sup>40</sup>. As we known, there  
13 are obvious regional differences in the social and economic level, diet structure and  
14 educational level in Guangdong province. These regional factors may have a direct  
15 impact on the fertility status and reproductive outcome of the local population. In  
16 China, the Pearl River Delta region has better economic situation, education condition  
17 and nutritional support than the non-Pearl River Delta regions. Therefore, according  
18 to our actual situation, we need to pay more attention to relatively poor regions. We  
19 recommend increasing investment in its economic, medical and health resources.  
20 Previous study indicated that regional factors may affect birth outcomes through  
21 psychosocial processes associated with health behavior, physiological stress  
22 hormones, or increased susceptibility to infection<sup>41</sup>. In the future work, we hope to  
23 further explore this topic by introducing more variables into the spatio-temporal  
24 model, rather than just economic conditions. Because there are few reports on the  
25 regional distribution of adverse pregnancy outcomes in China, the contribution of this  
26 study is to analyze the characteristics of adverse pregnancy outcomes in Guangdong  
27 province from two aspects: time trend and geographical distribution.

28  
29  
30  
31  
32  
33  
34  
35  
36  
37  
38  
39  
40  
41  
42  
43  
44  
45  
46  
47  
48  
49  
50  
51  
52 In fact, it is often difficult for developing countries to obtain accurate and complete  
53 demographic data and medical records for maternal delivery. This present study made  
54 use of high quality data of birth certificate from a structured database of birth  
55 certificate in Guangdong province. The results of this study involving a large cohort  
56 of live births provide a clear description of temporal trends and spatial distributions of  
57  
58  
59  
60

1  
2  
3  
4 PTB, LBW and SGA in Guangdong province, which can be a high-quality baseline  
5 indicator for the researchers and decision makers of the public health.  
6  
7

8  
9 This study does have several limitations. First, this study was just a descriptive  
10 analysis of temporal trends and spatial distributions of the adverse pregnancy  
11 outcomes, and unable to identify the causal relationship between spatio-temporal  
12 factors and adverse pregnancy outcomes. Although we used time trend profiles to  
13 roughly observe seasonal patterns, we did not consider potential factors that are  
14 difficult to measure, such as maternal infections and nutritional deficiencies. Second,  
15 it should note that there may have some delays in reporting birth certificate data at  
16 small hospitals in different cities, which can also have a potential impact on our study.  
17  
18  
19  
20  
21  
22  
23  
24  
25

26  
27 In summary, our study is one of the few studies based on a large cohort of newborns  
28 to understand the public health problem of adverse birth outcomes in China. The  
29 findings of this study contribute to the understanding of the etiology and  
30 epidemiology of PTB, LBW and SGA.  
31  
32  
33  
34  
35

### 36 37 **Funding**

38  
39 This work was supported by the National Natural Science Youth Fund of China (No.  
40 81703323). The funder had no role in study design, data collection and analysis,  
41 decision to publish, or preparation of the manuscript.  
42  
43  
44  
45  
46

### 47 48 **Competing interests**

49 The authors declare there is no conflict of interest regarding the publication of this  
50 paper.  
51  
52  
53  
54

### 55 56 **Contributions**

57  
58 HZM, LW, BL, FY contributed equally in this study and they are joint first authors.  
59 HZM, PG and QGZ conceived of or designed study. HZM, BL, FY, YLC, RYC,  
60

---

1  
2  
3  
4 YTW, and PG performed research. HZM, PG, and FY analyzed data. PG, HZM, JML,  
5  
6 and FY wrote and revised the paper. PG obtained the funding.  
7  
8  
9

### 10 **Patient consent**

11  
12 All data was collected from the Guangdong Birth Certificate System that collects  
13  
14 information of infants and young children from medical institutions in Guangdong  
15  
16 province. No patient consent form needed for data collection.  
17  
18  
19

### 20 **Ethics approval**

21  
22 This study was approved by the ethics committee of Guangdong Woman & Children  
23  
24 Hospital (Shantou, China).  
25  
26  
27  
28

### 29 **Data sharing**

30  
31 No additional data are available.  
32  
33  
34  
35  
36  
37  
38  
39  
40  
41  
42  
43  
44  
45  
46  
47  
48  
49  
50  
51  
52  
53  
54  
55  
56  
57  
58  
59  
60

---

## References

1. Mathews TJ, MacDorman MF. Infant mortality statistics from the 2008 period linked birth/infant death data set. *Natl Vital Stat Rep*2012;60:1-27.
2. Owen LS, Manley BJ, Davis PG, et al. The evolution of modern respiratory care for preterm infants. *LANCET*2017;389:1649-59.
3. WHO. WHO: recommended definitions, terminology and format for statistical tables related to the perinatal period and use of a new certificate for cause of perinatal deaths. Modifications recommended by FIGO as amended October 14, 1976. *Acta ObstetGynecolScand*1977;56:247-53.
4. Wardlaw T, Blanc A, Zupan J, et al. Low birthweight: country regional and global estimates. *New York New York Unicef Dec* 2004.doi:i9280638327
5. Saenger P, Czernichow P, Hughes I, et al. Small for Gestational Age: Short Stature and Beyond. *Endocrine Reviews*, 2007;28(2)219-251.
6. Beck S, Wojdyla D, Say L, et al. The worldwide incidence of preterm birth: a systematic review of maternal mortality and morbidity. *Bull World Health Organ*2010;88:31-8.doi: 10.2471/BLT.08.062554
7. Lawn JE, Cousens SN, Darmstadt GL, et al. 1 year after The Lancet Neonatal Survival Series--was the call for action heard? *LANCET*2006;367:1541-7.doi:10.1016/S0140-6736(06)68587-5
8. Lee ACD, Katz JS, Blencowe HM, et al. National and regional estimates of term and preterm babies born small for gestational age in 138 low-income and middle-income countries in 2010. *LANCET GLOB HEALTH* 2013;1:e26-36.doi:10.1016/S2214-109X(13)70006-8
9. He JR, Liu Y, Xia XY, et al. Ambient Temperature and the Risk of Preterm Birth in Guangzhou, China (2001–2011). *Environ Health Perspect.* 2016; 124(7):1100-6. doi: 10.1289/ehp.1509778.
10. Chen Y, Wu L, Zhang W, Zou L, Li G, Fan L. Delivery modes and pregnancy outcomes of low birth weight infants in China. *J Perinatol.* 2016; 36(1):41-6. doi: 10.1038/jp.2015.137.
11. Tamura N, Hanaoka T, Ito K, et al. Different Risk Factors for Very Low Birth

- 
- Weight, Term-Small-for-Gestational-Age, or Preterm Birth in Japan. *Int J Environ Res Public Health* 2018;15(2):369.doi:10.3390/ijerph15020369
12. Ota E, Ganchimeg T, Morisaki N, et al. Risk factors and adverse perinatal outcomes among term and preterm infants born small-for-gestational-age: secondary analyses of the WHO Multi-Country Survey on Maternal and Newborn Health. *PLOS ONE* 2014;9:e105155.doi:10.1371/journal.pone.0105155
13. Strand LB, Barnett AG, Tong S. The influence of season and ambient temperature on birth outcomes: a review of the epidemiological literature. *ENVIRON RES*2011;111:451-62.doi:10.1016/j.envres.2011.01.023
14. Ha S, Zhu Y, Liu D, et al. Ambient temperature and air quality in relation to small for gestational age and term low birthweight. *ENVIRON RES*2017;155:394-400.doi:10.1016/j.envres.2017.02.021
15. Lee SJ, Hajat S, Steer PJ, et al. A time-series analysis of any short-term effects of meteorological and air pollution factors on preterm births in London, UK. *ENVIRON RES*2008;106:185-94.doi:10.1016/j.envres.2007.10.003
16. Tustin K, Gross J, Hayne H. Maternal exposure to first-trimester sunshine is associated with increased birth weight in human infants. *DEV PSYCHOBIO*2004;45:221-30.doi:10.1002/dev.20030
17. Madsen C, Gehring U, Walker SE, et al. Ambient air pollution exposure, residential mobility and term birth weight in Oslo, Norway. *ENVIRON RES*2010;110:363-71.doi:10.1016/j.envres.2010.02.005
18. Johnson S, Bobb JF, Ito K, et al. Ambient Fine Particulate Matter, Nitrogen Dioxide, and Preterm Birth in New York City. *ENVIRON HEALTH PERSP*2016;124:1283-90.doi:10.1289/ehp.1510266
19. Liu S, Krewski D, Shi Y, et al. Association between gaseous ambient air pollutants and adverse pregnancy outcomes in Vancouver, Canada. *ENVIRON HEALTH PERSP*2003;111:1773-8.doi:10.1289/ehp.6251
20. Li Z, Rong Z, Shulian Z, et al. Chinese neonatal birth weight curve for different gestational age. *Chin J Pediatr*2015;53:97-103.



21. Blencowe H, Cousens S, Oestergaard MZ, et al. National, regional, and worldwide estimates of preterm birth rates in the year 2010 with time trends since 1990 for selected countries: a systematic analysis and implications. *LANCET*2012;379:2162-72.doi:10.1016/S0140-6736(12)60820-4
22. Liu L, Liu J, Liu Y, et al. Prevalence of preterm birth among singletons in 10 counties(cities)of China, 1993—2005. *Chin J Epidemiology* 2007:1051-4.
23. Dongmei Y, Liyun Z, Aidong L, et al. Incidence of low birth weight of neonates and the influencing factors in China. *CHINESE JOURNAL OF PREVENTIVE MEDICINE* 2007:150-4.
24. Yao F, Miao H, Li B, et al. New birthweight percentiles by sex and gestational age in Southern China and its comparison with the INTERGROWTH-21st Standard. *Sci Rep*2018;8:7567.doi:10.1038/s41598-018-25744-7
25. Georgios B, Athanasios M, Derek H, et al. Preterm birth seasonality in Greece: an epidemiological study. *Journal of Maternal-Fetal Medicine*2012;25:1406-12.
26. Darrow LA, Strickland MJ, Mitchel K, et al. Seasonality of birth and implications for temporal studies of preterm birth. *EPIDEMIOLOGY*2009;20:699-706.doi:10.1097/ede.0b013e3181a66e96
27. Woo Y, Ouh Y, Ahn KH, et al. Seasonal Pattern of Preterm Births in Korea for 2000 - 2012. *J KOREAN MED SCI*2016;31:1797-801.doi:10.3346/jkms.2016.31.11.1797
28. Rousham EK, Gracey M. Seasonality of low birthweight in indigenous Australians: an increase in pre-term birth or intrauterine growth retardation? *Aust NZ J Public Health*2010;22:669-72.doi:10.1111/j.1467-842X.1998.tb01467.x
29. Rayco-Solon P, Fulford AJ, Prentice AM. Differential effects of seasonality on preterm birth and intrauterine growth restriction in rural Africans. *AM J CLIN NUTR*2005;81:134-9.doi:10.1016/j.jgo.2014.09.086
30. Hughes MM, Katz J, Mullany LC, et al. Seasonality of birth outcomes in rural Sarlahi District, Nepal: a population-based prospective cohort. *BMC Pregnancy Childbirth*2014;14:310.doi:10.1186/1471-2393-14-310
31. Lee SJ, Steer PJ, Filippi V. Seasonal patterns and preterm birth: a systematic



- 
- review of the literature and an analysis in a London-based cohort. *BJOG*2006;113:1280-8.doi:10.1111/j.1471-0528.2006.01055.x
32. Konte JM, Creasy RK, Laros RJ. California North Coast Preterm Birth Prevention project. *OBSTET GYNECOL*1988;71:727-30.doi:10.1016/0378-5122(88)90133-8
33. Stan CM, Bouvain M, Pfister R, et al. Hydration for treatment of preterm labour. *Cochrane Database Syst Rev* 2013:D3096.doi:10.1002/14651858.CD003096
34. McGrath JJ, Barnett AG, Eyles DW. The association between birth weight, season of birth and latitude. *ANN HUM BIOL*2005;32:547-59.doi:10.1080/03014460500154699
35. Kim SE, Honda Y, Hashizume M, et al. Seasonal analysis of the short-term effects of air pollution on daily mortality in Northeast Asia. *SCI TOTAL ENVIRON*2017;576:850-7.doi:10.1016/j.scitotenv.2016.10.036
36. Sugawara J, Iwama N, Hoshiai T, et al. Regional Birth Outcomes after the 2011 Great East Japan Earthquake and Tsunami in Miyagi Prefecture. *Prehosp Disaster Med*2018;33:215-9.doi:10.1017/S1049023X18000183
37. de Souza BV, Hirakata V, Goldani MZ, et al. Temporal evolution of the risk factors associated with low birth weight rates in Brazilian capitals (1996-2011). *Popul Health Metr*2016;14:15. doi:10.1186/s12963-016-0086-0
38. Trasande L, Malecha P, Attina TM. Particulate Matter Exposure and Preterm Birth: Estimates of U.S. Attributable Burden and Economic Costs. *ENVIRON HEALTH PERSP*2016;124:1913-8.doi:10.1289/ehp.1510810
39. Woodruff TJ, Parker JD, Darrow LA, et al. Methodological issues in studies of air pollution and reproductive health. *ENVIRON RES*2009;109:311-20.doi:10.1016/j.envres.2008.12.012
40. Pandolfi E, Agricola E, Gonfiantini MV, et al. Women participating in a web-based preconception study have a high prevalence of risk factors for adverse pregnancy outcomes. *BMC Pregnancy Childbirth*. 2014, 17;14:169. doi:10.1186/1471-2393-14-169.
41. Schempf A, Strobino D, O'Campo P. Neighborhood effects on birthweight: an

---

1  
2  
3  
4 exploration of psychosocial and behavioral pathways in Baltimore, 1995--1996.  
5 *SOC SCI MED*2009;68:100-10.  
6  
7  
8  
9  
10  
11  
12  
13  
14  
15  
16  
17  
18  
19  
20  
21  
22  
23  
24  
25  
26  
27  
28  
29  
30  
31  
32  
33  
34  
35  
36  
37  
38  
39  
40  
41  
42  
43  
44  
45  
46  
47  
48  
49  
50  
51  
52  
53  
54  
55  
56  
57  
58  
59  
60

For peer review only

---

## Figure legends

**Figure 1. Geographical locations of the study.** Guangdong province is located in south China, and there are twenty-one cities including Guangzhou, Shenzhen, Foshan, Dongguan, Zhuhai, Zhongshan, Zhaoqing, Huizhou, Jiangmen, Chaozhou, Shantou, Jieyang, Meizhou, Shanwei, Shaoguan, Heyuan, Qingyuan, Yunfu, Yangjiang, Maoming, and Zhanjiang included in this study. The Pearl River Delta regions were marked with pink, and the Non-Pearl River Delta regions were indicated by light blue.

**Figure 2. Daily time-series plots of rates for the adverse pregnancy outcomes including preterm birth (PTB), low birth weight (LBW) and small for gestational age (SGA) in Guangdong province, China, from 1 January 2014 to 31 December 2017.**

**Figure 3. Heatmaps of weekly counts for the adverse pregnancy outcomes including preterm birth, low birth weight and small for gestational age across cities in Guangdong province, China, from January 1, 2014 to December 31, 2017.**

**Figure 4. Spatial distributions of rates of preterm birth (PTB), in Guangdong province, China, from January 1, 2014 to December 31, 2017. (A) Spatial distributions of PTB rates in 2014. (B) Spatial distributions of PTB rates in 2015. (C) Spatial distributions of PTB rates in 2016. (D) Spatial distributions of PTB rates in 2017.**

**Figure 5. Spatial distributions of rates of low birth weight (LBW), in Guangdong province, China, from January 1, 2014 to December 31, 2017. (A) Spatial distributions of LBW rates in 2014. (B) Spatial distributions of LBW rates in 2015. (C) Spatial distributions of LBW rates in 2016. (D) Spatial distributions of LBW rates in 2017.**

1  
2  
3  
4 **Figure 6. Spatial distributions of rates of small for gestational age (SGA), in**  
5 **Guangdong province, China, from January 1, 2014 to December 31, 2017. (A)**  
6 **Spatial distributions of SGA rates in 2014. (B) Spatial distributions of SGA rates in**  
7 **2015. (C) Spatial distributions of SGA rates in 2016. (D) Spatial distributions of SGA**  
8 **rates in 2017.**  
9  
10  
11  
12  
13  
14  
15  
16  
17  
18  
19  
20  
21  
22  
23  
24  
25  
26  
27  
28  
29  
30  
31  
32  
33  
34  
35  
36  
37  
38  
39  
40  
41  
42  
43  
44  
45  
46  
47  
48  
49  
50  
51  
52  
53  
54  
55  
56  
57  
58  
59  
60

For peer review only

## Tables

**Table 1. Basic characteristics of the study participants.**

| Characteristic                  | Category                     | Frequency | Percentage |
|---------------------------------|------------------------------|-----------|------------|
| Maternal age (years)            | < 20                         | 78116     | 2.68       |
|                                 | 20-24                        | 664443    | 22.78      |
|                                 | 25-29                        | 1163071   | 39.87      |
|                                 | 30-34                        | 682067    | 23.38      |
|                                 | ≥ 35                         | 329378    | 11.29      |
|                                 | Missing                      | 23        | 0.00       |
| Inhabited city                  | Pearl River Delta region     | 1254102   | 42.99      |
|                                 | Non-Pearl River Delta region | 1662996   | 57.01      |
| Infant sex                      | Boy                          | 1553948   | 53.27      |
|                                 | Girl                         | 1363125   | 46.73      |
|                                 | Missing                      | 25        | 0.00       |
| Year of birth                   | 2014                         | 763518    | 26.17      |
|                                 | 2015                         | 627146    | 21.50      |
|                                 | 2016                         | 794755    | 27.24      |
|                                 | 2017                         | 731679    | 25.08      |
| Season of birth                 | Spring                       | 675595    | 23.16      |
|                                 | Summer                       | 717762    | 24.61      |
|                                 | Autumn                       | 804275    | 27.57      |
|                                 | Winter                       | 719466    | 24.66      |
| Preterm birth                   | Yes                          | 121245    | 4.16       |
|                                 | No                           | 2792953   | 95.74      |
|                                 | Missing                      | 2900      | 0.10       |
| Low birth weight (LBW)          | Yes                          | 120846    | 4.14       |
|                                 | No                           | 2796122   | 95.85      |
|                                 | Missing                      | 130       | 0.00       |
| Small for gestational age (SGA) | Yes                          | 384637    | 12.86      |
|                                 | No                           | 2529522   | 82.88      |
|                                 | Missing                      | 2939      | 4.26       |
| Low birth weight (Yes)          | Preterm                      | 56748     | 46.96      |
|                                 | Full-term                    | 63968     | 52.93      |
|                                 | Missing                      | 130       | 0.11       |
| Small for gestational age (Yes) | Preterm                      | 9499      | 2.47       |
|                                 | Full-term                    | 375138    | 97.53      |

**Table 2. Rates of preterm birth (PTB), low birth weight (LBW) and small for gestational age (SGA) according to demographic characteristics, residence address and birth season by year.**

| Year   | Characteristic               | Adverse pregnancy outcome |                 |         |                 |         |                 |
|--------|------------------------------|---------------------------|-----------------|---------|-----------------|---------|-----------------|
|        |                              | PTB (%)                   | <i>P</i> -value | LBW (%) | <i>P</i> -value | SGA (%) | <i>P</i> -value |
| 2014   | Maternal age (years)         |                           | <0.0001         |         | <0.0001         |         | <0.0001         |
|        | < 35                         | 3.79                      |                 | 4.04    |                 | 14.39   |                 |
|        | ≥ 35                         | 6.43                      |                 | 5.17    |                 | 10.54   |                 |
|        | Inhabited city               |                           | <0.0001         |         | <0.0001         |         | <0.0001         |
|        | Pearl River Delta region     | 5.03                      |                 | 4.49    |                 | 11.75   |                 |
|        | Non-Pearl River Delta region | 3.39                      |                 | 3.91    |                 | 15.43   |                 |
|        | Infant sex                   |                           | <0.0001         |         | <0.0001         |         | <0.0001         |
|        | Boy                          | 4.43                      |                 | 3.63    |                 | 13.81   |                 |
|        | Girl                         | 3.47                      |                 | 4.68    |                 | 14.46   |                 |
|        | Season of birth              |                           | <0.0001         |         | 0.0003          |         | <0.0001         |
|        | Spring                       | 3.78                      |                 | 3.96    |                 | 13.85   |                 |
|        | Summer                       | 3.85                      |                 | 4.19    |                 | 14.88   |                 |
| Autumn | 3.8                          |                           | 4.21            |         | 14.88           |         |                 |
| Winter | 4.48                         |                           | 4.1             |         | 12.8            |         |                 |
| 2015   | Maternal age (years)         |                           | <0.0001         |         | <0.0001         |         | <0.0001         |
|        | < 35                         | 3.79                      |                 | 4.05    |                 | 14.09   |                 |
|        | ≥ 35                         | 6.5                       |                 | 4.91    |                 | 9.51    |                 |
|        | Inhabited city               |                           | <0.0001         |         | <0.0001         |         | <0.0001         |
|        | Pearl River Delta region     | 5.13                      |                 | 4.48    |                 | 11.06   |                 |
|        | Non-Pearl River Delta region | 3.43                      |                 | 3.93    |                 | 15.12   |                 |
|        | Infant sex                   |                           | <0.0001         |         | <0.0001         |         | <0.0001         |
|        | Boy                          | 4.51                      |                 | 3.68    |                 | 13.43   |                 |
|        | Girl                         | 3.47                      |                 | 4.63    |                 | 14.01   |                 |
|        | Season of birth              |                           | <0.0001         |         | <0.0001         |         | <0.0001         |
|        | Spring                       | 4.02                      |                 | 4.08    |                 | 13.36   |                 |
|        | Summer                       | 4.03                      |                 | 4.33    |                 | 14.59   |                 |
| Autumn | 3.87                         |                           | 4.19            |         | 14.24           |         |                 |
| Winter | 4.2                          |                           | 3.87            |         | 12.53           |         |                 |
| 2016   | Maternal age (years)         |                           | <0.0001         |         | <0.0001         |         | <0.0001         |
|        | < 35                         | 4.24                      |                 | 3.98    |                 | 12.4    |                 |
|        | ≥ 35                         | 6.87                      |                 | 4.88    |                 | 8.5     |                 |
|        | Inhabited city               |                           | <0.0001         |         | <0.0001         |         | <0.0001         |
|        | Pearl River Delta region     | 5.28                      |                 | 4.25    |                 | 9.9     |                 |
|        | Non-Pearl River Delta region | 3.82                      |                 | 3.92    |                 | 13.93   |                 |
|        | Infant sex                   |                           | <0.0001         |         | <0.0001         |         | <0.0001         |
|        | Boy                          | 5.02                      |                 | 3.61    |                 | 11.7    |                 |
|        | Girl                         | 4                         |                 | 4.62    |                 | 12.23   |                 |

1  
2  
3  
4  
5  
6  
7  
8  
9  
10  
11  
12  
13  
14  
15  
16  
17  
18  
19  
20  
21  
22  
23  
24  
25  
26  
27  
28  
29  
30  
31  
32  
33  
34  
35  
36  
37  
38  
39  
40  
41  
42  
43  
44  
45  
46  
47  
48  
49  
50  
51  
52  
53  
54  
55  
56  
57  
58  
59  
60

|      |                              |      |         |      |         |         |
|------|------------------------------|------|---------|------|---------|---------|
|      | Season of birth              |      | 0.0011  |      | <0.0001 | <0.0001 |
|      | Spring                       | 4.49 |         | 4.02 |         | 11.76   |
|      | Summer                       | 4.66 |         | 4.29 |         | 12.37   |
|      | Autumn                       | 4.43 |         | 4.08 |         | 12.01   |
|      | Winter                       | 4.6  |         | 3.93 |         | 11.58   |
| 2017 | Maternal age (years)         |      | <0.0001 |      | <0.0001 | <0.0001 |
|      | < 35                         | 3.67 |         | 4.11 |         | 13.85   |
|      | ≥ 35                         | 5.83 |         | 4.89 |         | 10.05   |
|      | Inhabited city               |      | <0.0001 |      | <0.0001 | <0.0001 |
|      | Pearl River Delta region     | 4.27 |         | 4.42 |         | 12.56   |
|      | Non-Pearl River Delta region | 3.82 |         | 4.08 |         | 13.82   |
|      | Infant sex                   |      | <0.0001 |      | <0.0001 | 0.1572  |
|      | Boy                          | 4.53 |         | 3.78 |         | 13.13   |
|      | Girl                         | 3.5  |         | 4.78 |         | 13.24   |
|      | Season of birth              |      | <0.0001 |      | <0.0001 | <0.0001 |
|      | Spring                       | 3.91 |         | 4.14 |         | 12.57   |
|      | Summer                       | 3.94 |         | 4.36 |         | 13.91   |
|      | Autumn                       | 3.98 |         | 4.46 |         | 14.23   |
|      | Winter                       | 4.36 |         | 4.04 |         | 12.02   |

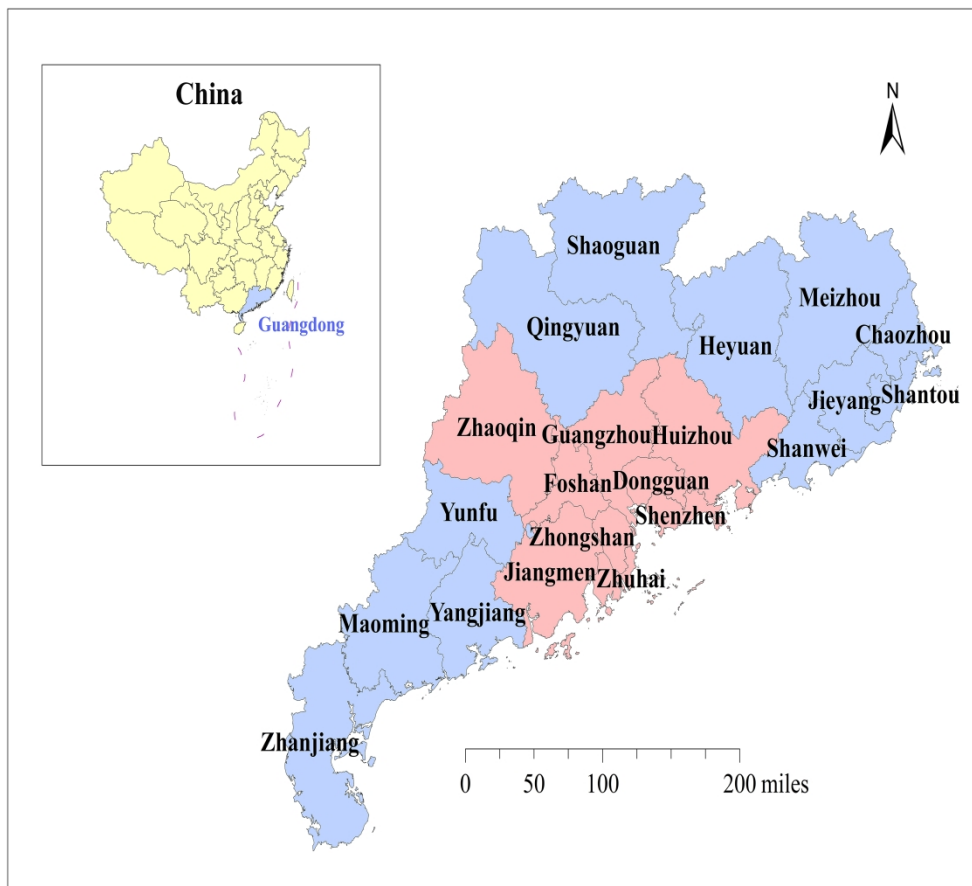

Fig 1



1  
2  
3  
4  
5  
6  
7  
8  
9  
10  
11  
12  
13  
14  
15  
16  
17  
18  
19  
20  
21  
22  
23  
24  
25  
26  
27  
28  
29  
30  
31  
32  
33  
34  
35  
36  
37  
38  
39  
40  
41  
42  
43  
44  
45  
46  
47  
48  
49  
50  
51  
52  
53  
54  
55  
56  
57  
58  
59  
60

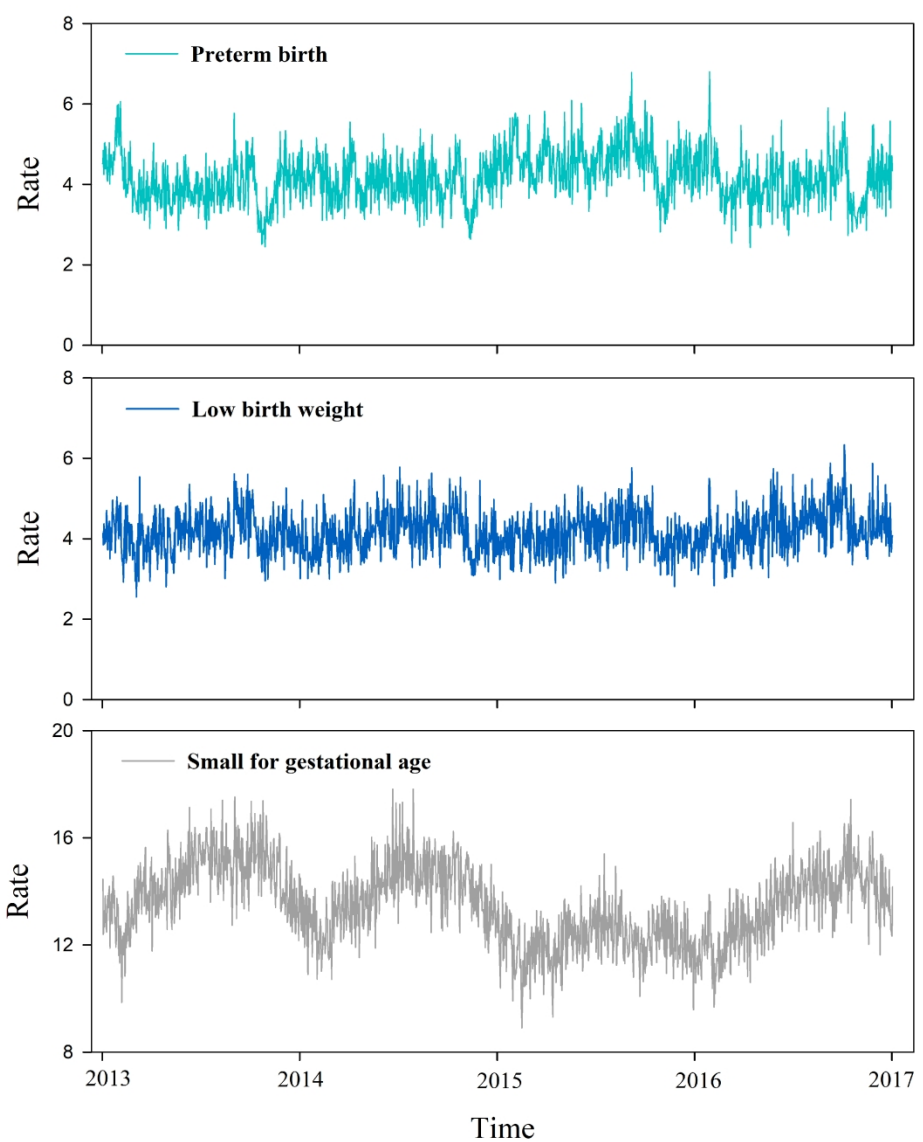

Fig 2

1  
2  
3  
4  
5  
6  
7  
8  
9  
10  
11  
12  
13  
14  
15  
16  
17  
18  
19  
20  
21  
22  
23  
24  
25  
26  
27  
28  
29  
30  
31  
32  
33  
34  
35  
36  
37  
38  
39  
40  
41  
42  
43  
44  
45  
46  
47  
48  
49  
50  
51  
52  
53  
54  
55  
56  
57  
58  
59  
60



Fig 3

1  
2  
3  
4  
5  
6  
7  
8  
9  
10  
11  
12  
13  
14  
15  
16  
17  
18  
19  
20  
21  
22  
23  
24  
25  
26  
27  
28  
29  
30  
31  
32  
33  
34  
35  
36  
37  
38  
39  
40  
41  
42  
43  
44  
45  
46  
47  
48  
49  
50  
51  
52  
53  
54  
55  
56  
57  
58  
59  
60

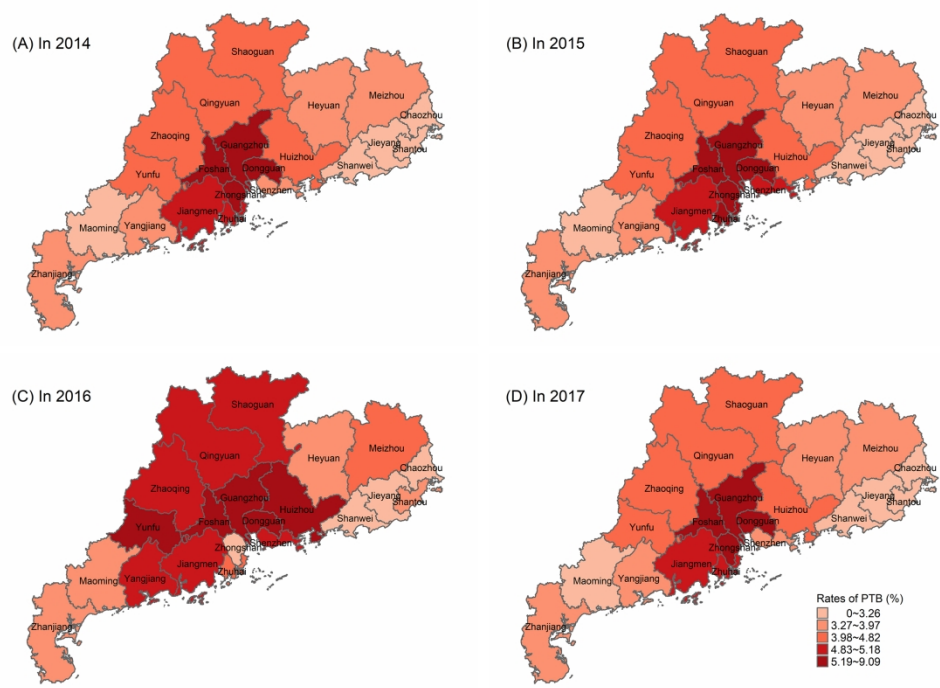

Fig 4



Fig 5

1  
2  
3  
4  
5  
6  
7  
8  
9  
10  
11  
12  
13  
14  
15  
16  
17  
18  
19  
20  
21  
22  
23  
24  
25  
26  
27  
28  
29  
30  
31  
32  
33  
34  
35  
36  
37  
38  
39  
40  
41  
42  
43  
44  
45  
46  
47  
48  
49  
50  
51  
52  
53  
54  
55  
56  
57  
58  
59  
60

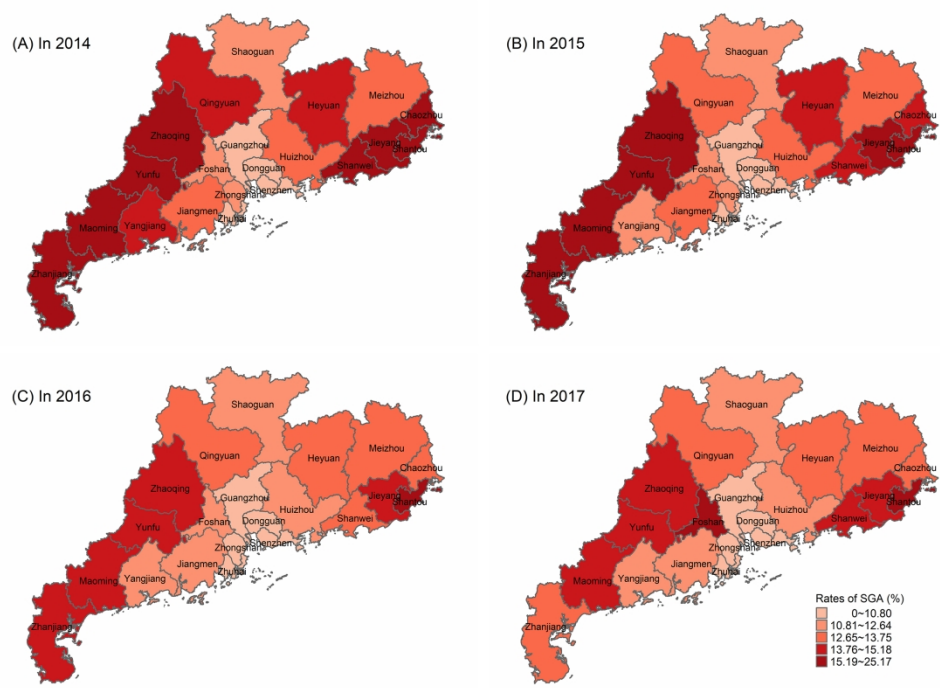

Fig 6

## Supplementary File

**Figure S1. The results of purely spatial clustering of preterm births according to the Kulldorff's spatial scan statistic. The most likely cluster identified was marked with red.**

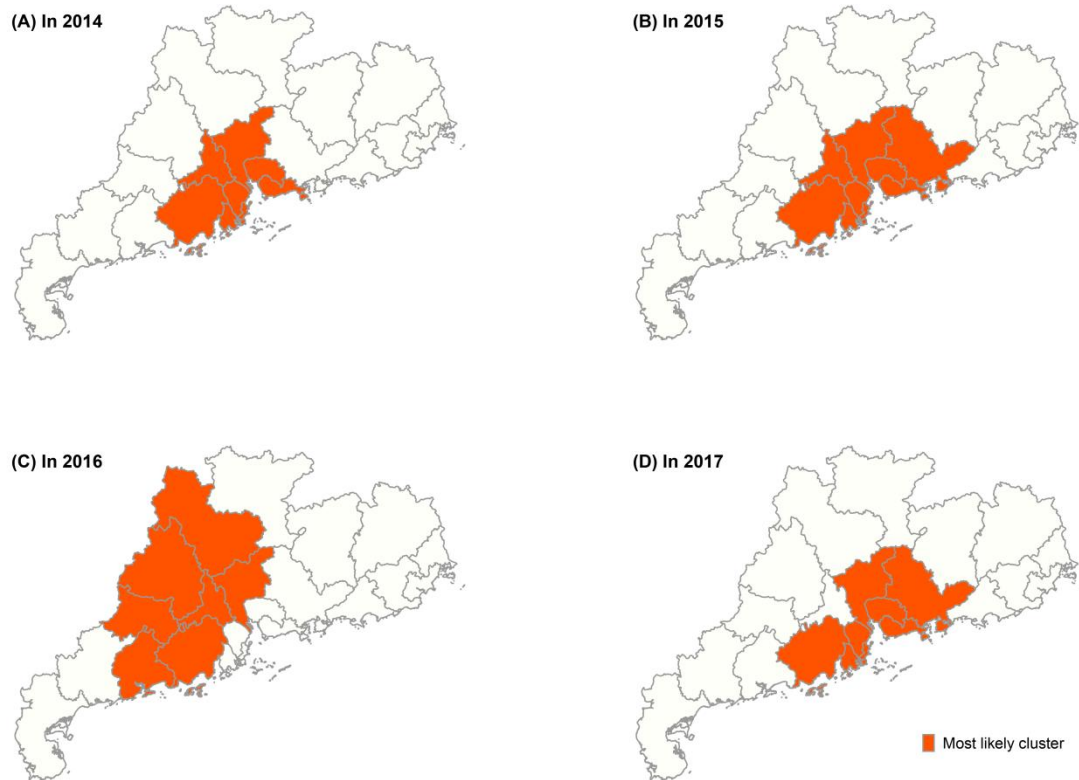

**Figure S2. The results of purely spatial clustering of low birth weight infants according to the Kulldorff's spatial scan statistic. The most likely cluster identified was marked with red.**

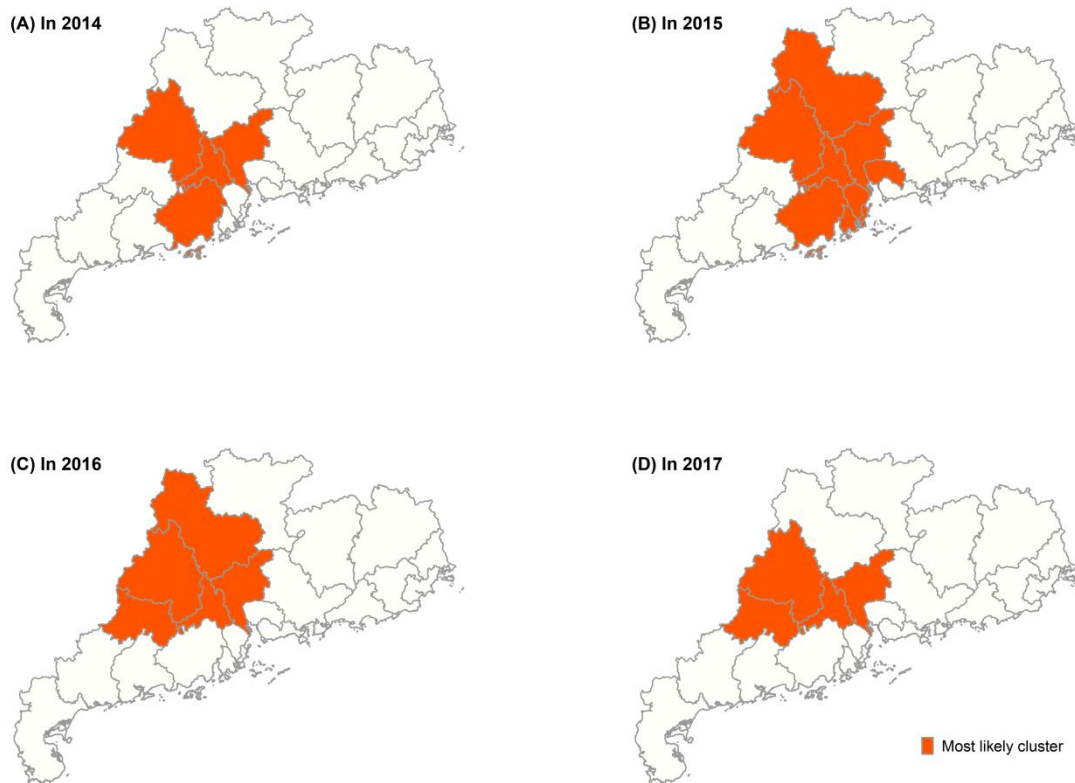

1  
2  
3  
4 **Figure S3. The results of purely spatial clustering of small-for-gestational-age**  
5 **infants according to the Kulldorff's spatial scan statistic. The most likely cluster**  
6 **identified was marked with red.**  
7  
8

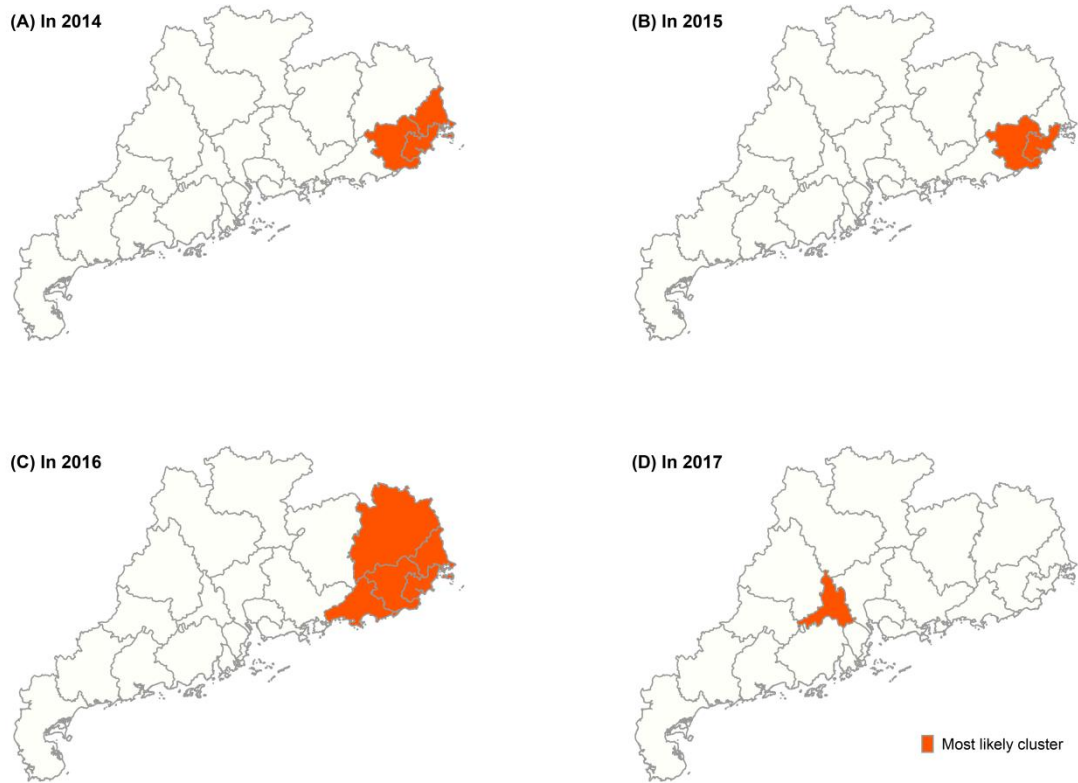



**Table S1. The results of purely spatial clustering according to the Kulldorff's spatial scan statistic.** The results of the most likely cluster by adverse birth outcome are shown.

| Outcome | Year | Coordinates         | Observed cases | Expected cases | LLR     | <i>P</i> -value |
|---------|------|---------------------|----------------|----------------|---------|-----------------|
| PTB     | 2014 | 22.5160N, 113.3926E | 9439           | 8669.02        | 560.61  | 0.00            |
|         | 2015 | 22.5603N, 113.1110E | 10716          | 9995.57        | 456.72  | 0.00            |
|         | 2016 | 23.0710N, 112.0032E | 11809          | 10390.57       | 320.46  | 0.00            |
|         | 2017 | 22.5533N, 113.8831E | 8892           | 8530.58        | 780.61  | 0.00            |
| LBW     | 2014 | 22.9003N, 112.8926E | 8037           | 6820.77        | 133.05  | 0.00            |
|         | 2015 | 22.9003N, 112.8926E | 12099          | 10424.63       | 135.78  | 0.00            |
|         | 2016 | 23.1582N, 112.5671E | 9840           | 8510.90        | 162.32  | 0.00            |
|         | 2017 | 23.1582N, 112.5671E | 7792           | 6677.31        | 73.06   | 0.00            |
| SGA     | 2014 | 23.4624N, 116.6781E | 5943           | 6331.37        | 404.23  | 0.00            |
|         | 2015 | 23.2503N, 116.4331E | 5013           | 5357.05        | 430.82  | 0.00            |
|         | 2016 | 23.4624N, 116.6781E | 9158           | 10061.89       | 691.66  | 0.00            |
|         | 2017 | 22.9203N, 112.8926E | 1824           | 1464.99        | 3260.36 | 0.00            |

PTB: Preterm birth; LBW: Low birth weight; SGA: small for gestational age; LLR: Log likelihood ratio.

Coordinates: The coordinates of the most likely cluster.

STROBE Statement—Checklist of items that should be included in reports of *cross-sectional studies*

|                              | Item No | Recommendation                                                                                                                                                                                               | Page No |
|------------------------------|---------|--------------------------------------------------------------------------------------------------------------------------------------------------------------------------------------------------------------|---------|
| <b>Title and abstract</b>    | 1       | (a) Indicate the study's design with a commonly used term in the title or the abstract                                                                                                                       | 1       |
|                              |         | (b) Provide in the abstract an informative and balanced summary of what was done and what was found                                                                                                          | 2       |
| <b>Introduction</b>          |         |                                                                                                                                                                                                              |         |
| Background/rationale         | 2       | Explain the scientific background and rationale for the investigation being reported                                                                                                                         | 4       |
| Objectives                   | 3       | State specific objectives, including any prespecified hypotheses                                                                                                                                             | 5       |
| <b>Methods</b>               |         |                                                                                                                                                                                                              |         |
| Study design                 | 4       | Present key elements of study design early in the paper                                                                                                                                                      | 5       |
| Setting                      | 5       | Describe the setting, locations, and relevant dates, including periods of recruitment, exposure, follow-up, and data collection                                                                              | 5       |
| Participants                 | 6       | (a) Give the eligibility criteria, and the sources and methods of selection of participants                                                                                                                  | 5       |
| Variables                    | 7       | Clearly define all outcomes, exposures, predictors, potential confounders, and effect modifiers. Give diagnostic criteria, if applicable                                                                     | 6       |
| Data sources/<br>measurement | 8*      | For each variable of interest, give sources of data and details of methods of assessment (measurement). Describe comparability of assessment methods if there is more than one group                         | 6       |
| Bias                         | 9       | Describe any efforts to address potential sources of bias                                                                                                                                                    | 6       |
| Study size                   | 10      | Explain how the study size was arrived at                                                                                                                                                                    | 6       |
| Quantitative variables       | 11      | Explain how quantitative variables were handled in the analyses. If applicable, describe which groupings were chosen and why                                                                                 | 6       |
| Statistical methods          | 12      | (a) Describe all statistical methods, including those used to control for confounding                                                                                                                        | 6,7     |
|                              |         | (b) Describe any methods used to examine subgroups and interactions                                                                                                                                          |         |
|                              |         | (c) Explain how missing data were addressed                                                                                                                                                                  |         |
|                              |         | (d) If applicable, describe analytical methods taking account of sampling strategy                                                                                                                           | 6       |
|                              |         | (e) Describe any sensitivity analyses                                                                                                                                                                        |         |
| <b>Results</b>               |         |                                                                                                                                                                                                              |         |
| Participants                 | 13*     | (a) Report numbers of individuals at each stage of study—eg numbers potentially eligible, examined for eligibility, confirmed eligible, included in the study, completing follow-up, and analysed            | 7       |
|                              |         | (b) Give reasons for non-participation at each stage                                                                                                                                                         |         |
|                              |         | (c) Consider use of a flow diagram                                                                                                                                                                           |         |
| Descriptive data             | 14*     | (a) Give characteristics of study participants (eg demographic, clinical, social) and information on exposures and potential confounders                                                                     | 7       |
|                              |         | (b) Indicate number of participants with missing data for each variable of interest                                                                                                                          |         |
| Outcome data                 | 15*     | Report numbers of outcome events or summary measures                                                                                                                                                         | 7-9     |
| Main results                 | 16      | (a) Give unadjusted estimates and, if applicable, confounder-adjusted estimates and their precision (eg, 95% confidence interval). Make clear which confounders were adjusted for and why they were included |         |

1  
2  
3  
4  
5  
6  
7  
8  
9  
10  
11  
12  
13  
14  
15  
16  
17  
18  
19  
20  
21  
22  
23  
24  
25  
26  
27  
28  
29  
30  
31  
32  
33  
34  
35  
36  
37  
38  
39  
40  
41  
42  
43  
44  
45  
46  
47  
48  
49  
50  
51  
52  
53  
54  
55  
56  
57  
58  
59  
60

|                          |    |                                                                                                                                                                            |      |
|--------------------------|----|----------------------------------------------------------------------------------------------------------------------------------------------------------------------------|------|
|                          |    | (b) Report category boundaries when continuous variables were categorized                                                                                                  |      |
|                          |    | (c) If relevant, consider translating estimates of relative risk into absolute risk for a meaningful time period                                                           |      |
| Other analyses           | 17 | Report other analyses done—eg analyses of subgroups and interactions, and sensitivity analyses                                                                             |      |
| <b>Discussion</b>        |    |                                                                                                                                                                            |      |
| Key results              | 18 | Summarise key results with reference to study objectives                                                                                                                   | 9-12 |
| Limitations              | 19 | Discuss limitations of the study, taking into account sources of potential bias or imprecision. Discuss both direction and magnitude of any potential bias                 | 12   |
| Interpretation           | 20 | Give a cautious overall interpretation of results considering objectives, limitations, multiplicity of analyses, results from similar studies, and other relevant evidence | 12   |
| Generalisability         | 21 | Discuss the generalisability (external validity) of the study results                                                                                                      |      |
| <b>Other information</b> |    |                                                                                                                                                                            |      |
| Funding                  | 22 | Give the source of funding and the role of the funders for the present study and, if applicable, for the original study on which the present article is based              | 13   |

\*Give information separately for exposed and unexposed groups.

**Note:** An Explanation and Elaboration article discusses each checklist item and gives methodological background and published examples of transparent reporting. The STROBE checklist is best used in conjunction with this article (freely available on the Web sites of PLoS Medicine at <http://www.plosmedicine.org/>, Annals of Internal Medicine at <http://www.annals.org/>, and Epidemiology at <http://www.epidem.com/>). Information on the STROBE Initiative is available at [www.strobe-statement.org](http://www.strobe-statement.org).

# BMJ Open

## Adverse birth outcomes in Guangdong province, China, 2014-2017: a spatio-temporal analysis of 2.9 million births

|                                 |                                                                                                                                                                                                                                                                                                                                                                                                                                                                                                                                                                                                                                                                                                                                                                                                                                                                                                 |
|---------------------------------|-------------------------------------------------------------------------------------------------------------------------------------------------------------------------------------------------------------------------------------------------------------------------------------------------------------------------------------------------------------------------------------------------------------------------------------------------------------------------------------------------------------------------------------------------------------------------------------------------------------------------------------------------------------------------------------------------------------------------------------------------------------------------------------------------------------------------------------------------------------------------------------------------|
| Journal:                        | <i>BMJ Open</i>                                                                                                                                                                                                                                                                                                                                                                                                                                                                                                                                                                                                                                                                                                                                                                                                                                                                                 |
| Manuscript ID                   | bmjopen-2019-030629.R2                                                                                                                                                                                                                                                                                                                                                                                                                                                                                                                                                                                                                                                                                                                                                                                                                                                                          |
| Article Type:                   | Original research                                                                                                                                                                                                                                                                                                                                                                                                                                                                                                                                                                                                                                                                                                                                                                                                                                                                               |
| Date Submitted by the Author:   | 08-Oct-2019                                                                                                                                                                                                                                                                                                                                                                                                                                                                                                                                                                                                                                                                                                                                                                                                                                                                                     |
| Complete List of Authors:       | Miao, Huazhang; Guangdong Women and Children Hospital, Department of Healthcare<br>Li, Bing; Guangdong Women and Children Hospital<br>Li, Wu; Guangdong Women and Children Hospital, Department of Healthcare<br>Yao, Fei; Guangdong Women and Children Hospital, Department of Healthcare<br>Chen, Yuliang; Shantou University Medical College, Department of Preventive Medicine<br>Chen, Ruyin; Shantou University Medical College, Department of Clinical Medicine<br>Lin, Jiumin; Second Affiliated Hospital of Shantou University Medical College, Department of Hepatology and Infectious Diseases<br>Wu, Yuntao; Guangdong Women and Children Hospital, Department of Healthcare<br>Guo, Pi; Shantou University Medical College, Department of Public Health<br>Zhao, Qingguo; Family Planning Research Institute of Guangdong Province, National Health and Family Planning Commission |
| <b>Primary Subject Heading</b>: | Public health                                                                                                                                                                                                                                                                                                                                                                                                                                                                                                                                                                                                                                                                                                                                                                                                                                                                                   |
| Secondary Subject Heading:      | Paediatrics                                                                                                                                                                                                                                                                                                                                                                                                                                                                                                                                                                                                                                                                                                                                                                                                                                                                                     |
| Keywords:                       | PUBLIC HEALTH, EPIDEMIOLOGY, Community child health < PAEDIATRICS                                                                                                                                                                                                                                                                                                                                                                                                                                                                                                                                                                                                                                                                                                                                                                                                                               |
|                                 |                                                                                                                                                                                                                                                                                                                                                                                                                                                                                                                                                                                                                                                                                                                                                                                                                                                                                                 |

SCHOLARONE™  
Manuscripts

---

## Adverse birth outcomes in Guangdong province, China, 2014-2017: a spatio-temporal analysis of 2.9 million births

### Authors

Huazhang Miao<sup>1, †</sup>, Bing Li<sup>1, †</sup>, Li Wu<sup>1, †</sup>, Fei Yao<sup>2, †</sup>, Yuliang Chen<sup>3</sup>, Ruyin Chen<sup>4</sup>, Jiumin Lin<sup>5</sup>, Yuntao Wu<sup>1</sup>, Pi Guo<sup>3, \*</sup>, Qingguo Zhao<sup>6, \*</sup>

<sup>1</sup> Guangdong Women and Children Hospital, Guangzhou, 511442, China

<sup>2</sup> The Affiliated Brain Hospital of Guangzhou Medicial University (Guangzhou Huiai Hospital), Guangzhou, 510370, China

<sup>3</sup> Department of Preventive Medicine, Shantou University Medical College, Shantou 515041, China

<sup>4</sup> Department of Clinical Medicine, Shantou University Medical College, Shantou 515041, China

<sup>5</sup> Department of Hepatology and Infectious Diseases, the Second Affiliated Hospital, Shantou University Medical College, Shantou 515041, China

<sup>6</sup> Epidemiological Research Office of Key Laboratory of Male Reproduction and Genetics (National Health and Family Planning Commission), Family Planning Research Institute of Guangdong Province, Guangzhou 510600, China

† These authors contributed equally to this paper and they are co-first authors.

\* Pi G. (Email: pguo@stu.edu.cn) and Qingguo Z. (Email: zqgfrost@126.com) contributed equally to this paper and they are co-senior authors.

The manuscript word counts 4155 words.

---

## Abstract

**Objectives** Adverse birth outcomes pose a great threat to the public health and bring a heavy burden of disease in China. A comprehensive examination of the temporal and spatial trends of preterm birth (PTB), low birth weight (LBW), and small for gestational age (SGA) epidemics can provide some elementary information for subsequent etiological and epidemiological studies. This study aimed to characterize the spatio-temporal features of PTB, LBW, and SGA based on a large cohort of live births in China.

**Design** Spatio-temporal descriptive analysis was performed in Guangdong province, China, from 2014 to 2017.

**Setting** Data involving 2,917,098 live births in Guangdong province, China from 2014 to 2017 was collected from Guangdong Birth Certificate System. Information was collected, including the date of birth, gestational age in week, birth weight, sex of the infant, age of the mother, and registered residence of the mother.

**Results** The estimated rate of PTB, LBW and SGA was 4.16%, 4.14% and 12.86%, respectively. For temporal trends, the rates of PTB, LBW and SGA showed seasonal fluctuations, especially for LBW and SGA. In addition, there were regional differences in the rates of PTB, LBW and SGA between the Pearl River Delta and Non-Pearl River Delta regions. From 2014 to 2017, the high rates of PTB and LBW expanded from the Pearl River Delta region to the Non-Pearl River Delta regions. However, compared with the Pearl River Delta region, the rate of SGA was higher in the Non-Pearl River Delta regions on the whole.

**Conclusion** The findings of this study contribute to the understanding of the etiology and epidemiology of PTB, LBW and SGA in south China.

**Keywords:** Preterm birth; Low birth weight; Small for gestational age; Spatial; Temporal

---

### Strengths and limitations of this study

- This study is a spatio-temporal descriptive analysis to reveal the current situation of adverse birth outcomes in Guangdong, south China.
- The study involves a cohort of nearly 2.9 million live births and further enhances our understanding of the temporal trend and spatial distribution of adverse pregnancy outcomes in south China.
- Multiple adverse pregnancy outcomes including preterm birth, low birth weight, and small for gestational age have been investigated and compared in terms of their temporal trend and spatial distribution.
- As a descriptive analysis, this study was unable to identify the causal relationship between spatio-temporal factors and adverse pregnancy outcomes.
- Delays in reporting birth certificate data at small hospitals in different cities may cause bias.

---

## Introduction

Previous studies <sup>1, 2</sup> suggested that severe infant morbidity and mortality partly resulted from adverse birth outcomes including preterm birth (PTB), low birth weight (LBW) and small for gestational age (SGA). PTB is defined as a live-birth infant with less than 37 complete weeks of gestation <sup>3</sup>. LBW is defined as a live-birth infant weighing less than 2,500 grams at birth <sup>4</sup>. SGA is defined as an infant whose birth weight falls below the 10th percentile by sex and gestational week of all singleton live births in a region <sup>5</sup>. With the development and progress of society and the continuous improvement of the level of medical care, the health condition of infants and young children has been significantly improved. However, adverse pregnancy outcomes such as PTB, LBW and SGA have not been effectively controlled, which has become an important risk factor for infant health. PTB rates were reported ranging from 6.2 % to 11.9% of live births in some developed and developing countries <sup>6</sup>. In fact, the incidence of LBW in developed countries is still high, and even rising <sup>7</sup>. Among 135 million infants born in low and middle income countries in 2010, it is estimated that 29.7 million (22%) were term births of SGA, and 2.8 million (2.1%) were PTBs of SGA <sup>8</sup>. In Guangzhou city of south China, a PTB rate of 5.6% has been reported in a previous study <sup>9</sup>. A retrospective study involving 39 hospitals of different levels from 14 provinces and autonomous regions in China throughout 2011 reported that a total of 7474 cases were diagnosed as LBW (incidence = 7.2%) <sup>10</sup>. Overall, these adverse birth outcomes pose a great threat to the health of infants.

Additionally, the adverse outcomes of PTB, LBW and SGA may also increase the risk of chronic diseases or developmental outcomes later in life <sup>11, 12</sup>. These facts show that PTB, LBW and SGA are still challenging problems of public health in many countries. Thus further research is needed to investigate the epidemiology of these problems more comprehensively. Many previous studies described significant seasonal variations of PTB, LBW or SGA with remarkable differences between regions <sup>13, 14</sup>. However, some researches didn't detect an association between temperature and adverse pregnancy outcome <sup>15-17</sup>. In fact, the conditions of evidence differed among



1  
2  
3  
4 different regions and studies. The complexity of PTB, LBW, SGA and relevant risk  
5 factors in the individual, social and spatial levels often make the causal relationship  
6 between identified risks and responses non-stationary in space and time. A  
7 comprehensive examination of the temporal and spatial trends of PTB, LBW, and  
8 SGA can provide some basic elements for subsequent etiological and epidemiological  
9 studies.  
10  
11  
12  
13  
14  
15  
16

17 As the southern gate of China, Guangdong province has the most developed economic  
18 and social level in South China <sup>18</sup>. However, there are still regional differences in the  
19 industrial development, the degree of medical care and the level of education of the  
20 local residents that cannot be ignored. These factors may have an impact on the  
21 fertility status of local residents in Guangdong province. In addition, more recent data  
22 about the fertility status of local residents have not been reported. There is an urgent  
23 need to provide an overall description of the fertility situation of the local population  
24 in order to carry out some other follow-up exploratory studies. Therefore, in order to  
25 fill in the gap, we performed a spatio-temporal analysis of PTB, LBW, and SGA,  
26 based on a large cohort involving approximately 3 million newborns in Guangdong  
27 province, China from 2014 to 2017. This study is more convincing because of the  
28 relatively large investigated samples. Additionally, this study analyzed regional  
29 differences of PTB, LBW and SGA between the Pearl River Delta and Non-Pearl  
30 River Delta regions. In general, the Pearl River Delta regions represent economically  
31 developed regions in Guangdong province, while Non-Pearl River Delta regions  
32 represent relatively underdeveloped regions. The findings of this study will contribute  
33 to the understanding of the etiology and epidemiology of PTB, LBW and SGA, and  
34 the design of prevention and intervention strategies for specific geographical areas  
35 and high-risk populations.  
36  
37  
38  
39  
40  
41  
42  
43  
44  
45  
46  
47  
48  
49  
50  
51  
52  
53  
54  
55

## 56 **Materials and methods**

### 57 **Patient and public involvement**

58 All birth data in this study was obtain from Guangdong Birth Certificate System and  
59  
60

1  
2  
3  
4 was only used for statistical analysis. Information of newborn and mothers across  
5 Guangdong province were collected in this study. No patients or public were involved  
6 in development of research question, study design, conduction of research and  
7 measurement of outcome. There are no plans of disseminating research results to  
8 participants.  
9  
10  
11  
12

### 13 14 15 **Ethics statement**

16 Ethical approval was obtained from ethics committee of Guangdong Woman and  
17 Children Hospital. The approval number is 201601011.  
18  
19  
20  
21  
22

### 23 **Data preparation**

24 All birth data was collected from the Guangdong Birth Certificate System, which  
25 collects information of infants and young children from medical institutions in  
26 Guangdong province. After childbirth, obstetric medical staff put the baby on an  
27 electronic scale, record stable weight data. Health care workers or midwives fill out  
28 the delivery information of the newborn in the regional maternal and child  
29 information system. The logical settings of the system have been corrected to ensure  
30 the convincing records. Finally, the information will be transferred to the Guangdong  
31 Birth Certificate System. After the data being imported, the midwife director and the  
32 hospital doctor director need to confirm the birth information. Before the birth  
33 certificate is issued, the department of medical management and the parents should  
34 check the birth information again. All the information is verified by medical  
35 professionals. The birth registration database contains the date of birth, gestational  
36 age in week, birth weight, sex of the infant, parity, age of the mother, and registered  
37 residence of the mother. All live newborns were included in the study except for  
38 stillbirths, deaths within days of birth and birth defects. To reduce bias, the subset of  
39 births was limited to singleton live births with 22-42 completed weeks gestation <sup>19</sup>.  
40 After further excluding births with implausible birth weights (less than 500 grams) <sup>20</sup>  
41 and verifying data, we included a total number of 2,914,198 births in our analysis.  
42  
43  
44  
45  
46  
47  
48  
49  
50  
51  
52  
53  
54  
55  
56  
57  
58  
59  
60

---

## Data analysis

We described basic characteristics of the newborns and mothers, and the rates of PTB, LBW and SGA according to the studied characteristics by year and compared the estimates using  $\chi^2$  test. In order to observe the temporal trends in the occurrence of PTB, LBW and SGA in the study site, we calculated daily rates of PTB (daily number of live births with gestational age less than 37 weeks/daily number of live births  $\times$  100%)<sup>3</sup>, daily rates of LBW (daily number of live births with birth weight less than 2500 g / daily number of live births  $\times$  100%)<sup>4</sup>, daily rates of SGA (daily number of live births with birth weight less than the 10th percentile of the normal average birth weight at the same gestational age/daily number of live births at the same gestational age  $\times$  100%)<sup>21</sup>, respectively. We determined the season of birth based on the birth date (spring: March-May, summer: June-August; autumn: September-November, winter: December-February). Heatmaps of weekly average rates of PTB, LBW and SGA were drawn to investigate whether the rates exhibited an obvious seasonality. SAS software version 9.3 (SAS Institute Inc.; Cary, NC, the United States) was used for the statistical analyses.

According to economic conditions, Guangdong province can be divided into Pearl River Delta regions and Non-Pearl River Delta regions. Pearl River Delta regions are economically developed regions, including Guangzhou, Shenzhen, Foshan, Dongguan, Zhuhai, Zhongshan, Zhaoqing, Huizhou and Jiangmen cities. By contrast, Non-Pearl River Delta regions are relatively underdeveloped regions, including Shantou, Chaozhou, Jieyang, Shanwei, Zhanjiang, Maoming, Yangjiang, Yunfu, Shaoguan, Qingyuan, Meizhou and Heyuan cities. Besides, city boundary shape files of Guangdong province were publicly obtained from the National Geomatics Center of China (<http://www.ngcc.cn/ngcc/>) and used for disease mapping. We mapped the spatial distributions of rates for the adverse birth outcomes to investigate the spatial distributions pattern of the birth outcomes through 2014 to 2017. In addition, we calculated the Kulldorff's spatial scan statistic using the DCluster package within R software for purely spatial cluster detection of the adverse birth outcomes. All

1  
2  
3  
4 statistical tests were 2-tailed. *P*-value less than 0.05 were considered to be statistically  
5 significant.  
6  
7

## 8 9 **Results**

10  
11 Figure 1 shows the geographical locations of the study in Guangdong province.  
12 Guangdong province is located in southern China and is also currently the most  
13 populous province in China. There were a total of 2,917,098 births in Guangdong  
14 province during the study period, 1,553,948 (53.27%) were boys. Approximately 22%  
15 (627,146) babies were born in 2015, which is the lowest population of all births  
16 between 2014 and 2017. As illustrated in Table 1, the proportion of mothers who aged  
17 less than 20, 20 to 24, 25 to 29, 30 to 34, and over 35 years old was 2.68%, 22.78%,  
18 39.87%, 23.38% and 11.29%, respectively. For the seasons of birth, the proportion of  
19 babies born in spring, summer, autumn and winter was 23.16%, 24.61%, 27.57% and  
20 24.66%, respectively. There were 56,748 (42.96%) LBW of preterm births, while  
21 there were 63,968 (52.93%) LBW of term births. Regarding SGA infants, 2.47% were  
22 preterm births, while 97.53% were term births.  
23  
24  
25  
26  
27  
28  
29  
30  
31  
32  
33  
34  
35

36 Table 2 reveals that the rates of PTB, LBW and SGA according to demographic  
37 characteristics, residence address and birth seasons by year. Infants born from women  
38 aged less than 35 years have higher rates of LBW and PTB outcomes than women  
39 younger than 35 years old (all *P*-values < 0.05). However, the rates of the difference  
40 were gradually decreasing from 2014 to 2017. From 2014 to 2016, there was a  
41 downward trend in the rates of SGA among pregnant women who were not less than  
42 35 years old and less than 35 years old. In 2017, the rates for SGA by two groups of  
43 pregnant women rose slightly. Generally, infants who were born in the Pearl River  
44 Delta regions had higher rates of PTB and LBW than those who were born in  
45 Non-Pearl River Delta regions in Guangdong (all *P*-values < 0.05). However, infants  
46 who were born in the Pearl River Delta regions tended to have lower rates of SGA  
47 than those who were born in Non-Pearl River Delta regions (all *P*-values < 0.05). Boy  
48 and girl babies tended to be similar in the rates of the outcomes. We found the PTB  
49  
50  
51  
52  
53  
54  
55  
56  
57  
58  
59  
60

1  
2  
3  
4 rates of boys were higher than that of girls (all  $P$ -values  $< 0.05$ ), among which the  
5 highest rate was in 2016 (5.02%). Besides, the LBW rates of girls were higher than  
6 that of boys (all  $P$ -values  $< 0.05$ ), among which the highest rate was in 2017 (4.78%).  
7 For SGA, the highest rate was 14.46% in the girls group. In addition, the rates of PTB,  
8 LBW and SGA statistically varied among seasons of birth, respectively (all  $P$ -values  
9  $< 0.05$ ). For PTB, the highest rates were clustered in winter. For LBW, the highest  
10 rates did not show cluster tendency of season. However, for SGA, the highest rates  
11 were clustered in summer or autumn.  
12  
13  
14  
15  
16  
17  
18  
19  
20

21 Figure 2 depicts daily time-series plots of the rates for the adverse pregnancy  
22 outcomes including PTB, LBW and SGA. Upon visual inspection, the rates of PTB,  
23 LBW and SGA show, to some degree, seasonal fluctuation trends, especially for the  
24 outcomes of PTB and SGA. In 2014, the rate of PTB ranged from 2.45% in October  
25 to 6.06% in February. The period of highest rates of PTB was between December and  
26 February. In 2015 and 2016, the rates of PTB in November were the lowest in the  
27 course of the year. In contrast, in 2016 and 2017, the highest rates of PTB were in  
28 October. In 2014, infants had a peak rate (5.61%) of LBW in September. Infants born  
29 from February to April were least likely to suffer from LBW, with the lowest rate  
30 (2.55%) in March. In 2017, there was a similar pattern for LBW infants with the rate  
31 (2.80%) in February, which clearly lower than the figure between September and  
32 October. Additionally, the peak rate (6.30%) of LBW occurred in October. The  
33 average of daily rates of SGA was 14.30% in this study. During the period from 2014  
34 to 2017, infants were least likely to suffer from SGA between January and March,  
35 which is similar to the outcome of LBW. In addition, infants were most likely to  
36 suffer from SGA between September and October.  
37  
38  
39  
40  
41  
42  
43  
44  
45  
46  
47  
48  
49  
50  
51  
52  
53

54 Figure 3 depicts the heatmaps of weekly average rates for PTB, LBW and SGA across  
55 cities in Guangdong province, from 2014 to 2017. For most cities, there was a  
56 remarkable seasonality in the rates of the adverse pregnancy outcomes, especially for  
57 LBW and SGA.  
58  
59  
60

1  
2  
3  
4  
5  
6  
7  
8  
9  
10  
11  
12  
13  
14  
15  
16  
17  
18  
19  
20  
21  
22  
23  
24  
25  
26  
27  
28  
29  
30  
31  
32  
33  
34  
35  
36  
37  
38  
39  
40  
41  
42  
43  
44  
45  
46  
47  
48  
49  
50  
51  
52  
53  
54  
55  
56  
57  
58  
59  
60

---

Figure 4 shows the spatial distributions of PTB rates, as expressed in per 100 persons, in Guangdong, from 2014 to 2017. The figure revealed that the rates of PTB were relatively high in the Pearl River Delta regions. For the years of 2014 and 2015, the highest rates of PTB were in Zhongshan and Foshan cities, located in Pearl River Delta regions. In 2016, the city of Foshan had the highest rate of PTB. Additionally, we observed that Yunfu which was located near the Pearl River Delta region had a distinctly high rate of PTB in 2016. In 2017, the city of Zhongshan has the highest rate of PTB. We observed spatial heterogeneity of PTB outcome across the study time period in Guangdong province (Fig S1 and Table S1), and the most likely cluster appearing in the Pearl River Delta was detected.

Similarly, the spatial heterogeneity of LBW and SGA was also observed in Guangdong province (Fig S2, Fig S3 and Table S1). Figure 5 and 6 depict the maps of spatial distributions of rates for LBW and SGA in Guangdong, respectively. In the years of 2014 and 2015, the rates of LBW were relatively high in the cities including Zhongshan, Foshan, Dongguan and Guangzhou in Pearl River Delta regions. In 2016, the rates of LBW were relatively high in Guangzhou, Huizhou, Dongguan and Foshan. In 2017, the rates of LBW were relatively high in Zhongshan, Huizhou, and Guangzhou in the Pearl River Delta region. For the outcomes of SGA, the cities including Shantou, Zhaoqing, and Yunfu had higher rates than other cities from 2014 to 2017. In addition, the rate of SGA in Foshan was also high in 2017.

## Discussion

Our study analyzed a total number of 2,917,098 live births to reveal the characteristics of the temporal trends and spatial distributions of PTB, LBW and SGA in Guangdong province from 2014 to 2017. This study reveals the overall situation and regional differences of fertility among local residents in Guangdong province, and provides more recent data about the reproductive status of local pregnant women. These findings will be beneficial to subsequently explore on the causes of differences in the

fertility in Guangdong province.

For PTB, Beck et al. <sup>6</sup> reported in a systematic review that 9.6% were preterm births among 12.9 million births worldwide in 2005. A study estimated 14.9 million babies were preterm births in 2010, accounting for 11.1% of all live births worldwide, ranging from about 5% in several European countries to 18% in some African countries <sup>22</sup>. A study revealed that PTB rate was around 4.75% among 10 counties and cities in China, based on Perinatal Healthcare Surveillance System from 1993 to 2005 <sup>23</sup>. As the United Nations International Children's Emergency Fund (UNICEF) announced in 2007, the rates of LBW in China were still lower than those of some developed countries, such as the United States (8%), Australia (7%), the United Kingdom (8%), Canada (6%), and Japan (8%) <sup>10</sup>. However, the rate of LBW in China was slightly higher than the figure in South Korea (4%). According to a survey covering 14 provinces in China, the LBW rate in 1998 was 5.87%, and it decreased to 4.6% in 2006 <sup>24</sup>. For the worldwide rates of SGA, a previous study showed the rates were relatively high in Cambodia (18.8%), Nepal (17.9%), the Occupied Palestinian Territory (16.1%) and Japan (16.0%), while rates were relatively low in Afghanistan (4.8%), Uganda (6.6%) and Thailand (9.7%) <sup>12</sup>. In addition, a recent cross-sectional population-based study revealed that the rate of SGA was 12.93% from January 1, 2017 to October 31, 2017 in southern China <sup>25</sup>. However, the study was based on a relatively small size of data. Our study, based on a large size of data, revealed that the rates of PTB, LBW and SGA in Guangdong province were relatively low, compared with other countries in the world.

The data represents statistically significant seasonal variations of births and adverse birth outcomes in Guangdong province, China. Seasonal patterns of birth outcomes were not consistent, which may reflect different etiologies and risk factors of time for each of the examined birth outcomes. For the rates of PTB, the highest number almost occurred in winter. Besides, for SGA, the highest rates were in summer or autumn from 2014 to 2017. Studies in developed countries such as Greece <sup>26</sup>, Atlanta <sup>27</sup> and



1  
2  
3  
4 South Korea<sup>28</sup> revealed that PTB has a seasonal trend. LBW was also found seasonal  
5 trends<sup>29</sup>. A study revealed that PTB and SGA showed divergent patterns of  
6 seasonality in rural African community<sup>30</sup>. Seasonality of PTB, LBW and SGA was  
7 also found in Nepal. Our study indicated that the rate of PTB in November was the  
8 lowest in 2015 and 2016, while the rate in October was the highest in 2016 and 2017.  
9 Hughes et Al.<sup>31</sup> also found infants were least likely to suffer from SGA from January  
10 to March. In contrast, Infants were most likely to suffer from SGA from June to  
11 August and in November. In our study, the rates of SGA peaked in the time period  
12 between September and October, and the rates were relatively low from January to  
13 March. In some countries, it was also reported that PTB had an obvious seasonal trend.  
14 In London<sup>32</sup>, babies born in winter were more likely to suffer from PTB compared  
15 with those born in spring. In Gambia<sup>30</sup>, the rates of PTB peaked twice in a year, once  
16 in the hunger season in July and once in October. However, a previous study from the  
17 United States reported no seasonality in the rates of PTB<sup>33</sup>. We speculate that the  
18 inconsistent results from different countries were partly due to the differences in the  
19 study population related to geography, culture and socio-economics. Environmental  
20 factors including temperature, humidity, and sunlight have been associated with birth  
21 outcomes. According to an animal model, a biological explanation for increasing the  
22 risk of PTB is that high temperatures increase the chances of dehydration<sup>34</sup>. This  
23 effect increases the risk of PTB due to decreased uterine blood flow and increased  
24 secretion of prostaglandins and oxytocin. Another hypothesis is that the effect of  
25 sunlight on vitamin D levels may affect fetal growth<sup>35</sup>. A study indicated that  
26 seasonal patterns are potential representatives of various environmental exposures<sup>36</sup>.

27  
28  
29  
30  
31  
32  
33  
34  
35  
36  
37  
38  
39  
40  
41  
42  
43  
44  
45  
46  
47  
48  
49  
50  
51 In terms of spatial factors, the PTB, LBW and SGA rates in the Pearl River Delta  
52 region were significantly different from those in the non-Pearl River Delta region. A  
53 regional analysis in Japan revealed that incidence of PTB was 3.2% in coastal areas  
54 and 5.0% in inland areas, respectively, and the incidence of LBW was 6.5% in the  
55 coastal areas and 8.5% in the inland areas<sup>37</sup>. Our results of geographical distributions  
56 of the adverse pregnancy outcomes were basically consistent with the results from  
57  
58  
59  
60



1  
2  
3  
4 Brazilian regions, in which a higher LBW rates were observed in the developed  
5 regions compared with less developed regions<sup>38</sup>. Overall, from 2014 to 2017, the high  
6 rates of PTB and LBW expanded from the Pearl River Delta region to the Non-Pearl  
7 River Delta regions. The trend of LBW rates increased in less developed areas of  
8 Guangdong province year by year. Previous studies also suggested that PTB is often  
9 associated with LBW, and their risk factors are similar<sup>39, 40</sup>. Our study indicated that  
10 the rates of SGA in the non-Pearl River Delta regions were generally higher than the  
11 Pearl River Delta regions. Previous study suggested that adverse pregnancy outcomes  
12 can be increased by preconception risk factors and lifestyles<sup>41</sup>. As we known, there  
13 are obvious regional differences in the level of social-economic development in  
14 Guangdong province<sup>42</sup>. These regional factors may have a direct impact on the  
15 fertility status and reproductive outcome of the local population. In China, the Pearl  
16 River Delta region has better economic situation, education condition and nutritional  
17 support than the non-Pearl River Delta regions. Therefore, according to our actual  
18 situation, we need to pay more attention to relatively poor regions. We recommend  
19 increasing investment in its economic, medical and health resources. Previous study  
20 indicated that regional factors may affect birth outcomes through psychosocial  
21 processes associated with health behavior, physiological stress hormones, or increased  
22 susceptibility to infection<sup>43</sup>. In the future work, we hope to further explore this topic  
23 by introducing more variables into the spatio-temporal model, rather than just  
24 economic conditions. Because there are few reports on the regional distribution of  
25 adverse pregnancy outcomes in China, the contribution of this study is to analyze the  
26 characteristics of adverse pregnancy outcomes in Guangdong province from two  
27 aspects: time trend and geographical distribution.

28  
29  
30  
31  
32  
33  
34  
35  
36  
37  
38  
39  
40  
41  
42  
43  
44  
45  
46  
47  
48  
49  
50  
51  
52 In fact, it is often difficult for developing countries to obtain accurate and complete  
53 demographic data and medical records for maternal delivery. This present study made  
54 use of high quality data of birth certificate from a structured database of birth  
55 certificate in Guangdong province. The results of this study involving a large cohort  
56 of live births provide a clear description of temporal trends and spatial distributions of  
57  
58  
59  
60

1  
2  
3  
4 PTB, LBW and SGA in Guangdong province, which can be a high-quality baseline  
5 indicator for the researchers and decision makers of the public health.  
6  
7

8  
9 This study does have several limitations. First, this study was just a descriptive  
10 analysis of temporal trends and spatial distributions of the adverse pregnancy  
11 outcomes, and unable to identify the causal relationship between spatio-temporal  
12 factors and adverse pregnancy outcomes. Although we used time trend profiles to  
13 roughly observe seasonal patterns, we did not consider potential factors that are  
14 difficult to measure, such as maternal infections and nutritional deficiencies. Second,  
15 it should note that there may have some delays in reporting birth certificate data at  
16 small hospitals in different cities, which can also have a potential impact on our study.  
17  
18  
19  
20  
21  
22  
23  
24  
25  
26

27 In summary, our study is one of the few studies based on a large cohort of newborns  
28 to understand the public health problem of adverse birth outcomes in China. The  
29 findings of this study contribute to the understanding of the etiology and  
30 epidemiology of PTB, LBW and SGA.  
31  
32  
33  
34  
35  
36

### 37 **Funding**

38  
39 This work was supported by the National Natural Science Youth Fund of China (No.  
40 81703323). The funder had no role in study design, data collection and analysis,  
41 decision to publish, or preparation of the manuscript.  
42  
43  
44  
45  
46  
47

### 48 **Competing interests**

49 The authors declare there is no conflict of interest regarding the publication of this  
50 paper.  
51  
52  
53  
54  
55

### 56 **Contributions**

57  
58 HZM, LW, BL, FY contributed equally in this study and they are joint first authors.  
59 HZM, PG and QGZ conceived of or designed study. HZM, BL, LW, FY, YLC, RYC,  
60

---

1  
2  
3  
4 YTW, and PG performed research. HZM, PG, and FY analyzed data. PG, HZM, JML,  
5  
6 FY and QGZ wrote and revised the paper. PG obtained the funding.  
7  
8  
9

### 10 **Patient consent**

11  
12 All data was collected from the Guangdong Birth Certificate System that collects  
13  
14 information of infants and young children from medical institutions in Guangdong  
15  
16 province. No patient consent form needed for data collection.  
17  
18  
19

### 20 **Ethics approval**

21  
22 This study was approved by the ethics committee of Guangdong Woman & Children  
23  
24 Hospital (Shantou, China).  
25  
26  
27

### 28 **Data sharing**

29  
30 No additional data are available.  
31  
32  
33  
34  
35  
36  
37  
38  
39  
40  
41  
42  
43  
44  
45  
46  
47  
48  
49  
50  
51  
52  
53  
54  
55  
56  
57  
58  
59  
60

---

## References

1. Mathews TJ, MacDorman MF. Infant mortality statistics from the 2008 period linked birth/infant death data set. *Natl Vital Stat Rep*2012;60:1-27.
2. Owen LS, Manley BJ, Davis PG, et al. The evolution of modern respiratory care for preterm infants. *LANCET*2017;389:1649-59.
3. WHO. WHO: recommended definitions, terminology and format for statistical tables related to the perinatal period and use of a new certificate for cause of perinatal deaths. Modifications recommended by FIGO as amended October 14, 1976. *Acta ObstetGynecolScand*1977;56:247-53.
4. Wardlaw T, Blanc A, Zupan J, et al. Low birthweight: country regional and global estimates. *New York New York Unicef Dec* 2004.doi:i9280638327
5. Saenger P, Czernichow P, Hughes I, et al. Small for Gestational Age: Short Stature and Beyond. *Endocrine Reviews*, 2007;28(2)219-251.
6. Beck S, Wojdyla D, Say L, et al. The worldwide incidence of preterm birth: a systematic review of maternal mortality and morbidity. *Bull World Health Organ*2010;88:31-8.doi: 10.2471/BLT.08.062554
7. Lawn JE, Cousens SN, Darmstadt GL, et al. 1 year after The Lancet Neonatal Survival Series--was the call for action heard? *LANCET*2006;367:1541-7.doi:10.1016/S0140-6736(06)68587-5
8. Lee ACD, Katz JS, Blencowe HM, et al. National and regional estimates of term and preterm babies born small for gestational age in 138 low-income and middle-income countries in 2010. *LANCET GLOB HEALTH* 2013;1:e26-36.doi:10.1016/S2214-109X(13)70006-8
9. He JR, Liu Y, Xia XY, et al. Ambient Temperature and the Risk of Preterm Birth in Guangzhou, China (2001–2011). *Environ Health Perspect*. 2016; 124(7):1100-6. doi: 10.1289/ehp.1509778.
10. Chen Y, Wu L, Zhang W, Zou L, Li G, Fan L. Delivery modes and pregnancy outcomes of low birth weight infants in China. *J Perinatol*. 2016; 36(1):41-6. doi: 10.1038/jp.2015.137.
11. Tamura N, Hanaoka T, Ito K, et al. Different Risk Factors for Very Low Birth

- 1  
2  
3  
4 Weight, Term-Small-for-Gestational-Age, or Preterm Birth in Japan. *Int J*  
5 *Environ Res Public Health* 2018;15(2):369.doi:10.3390/ijerph15020369  
6  
7  
8 12. Ota E, Ganchimeg T, Morisaki N, et al. Risk factors and adverse perinatal  
9 outcomes among term and preterm infants born small-for-gestational-age:  
10 secondary analyses of the WHO Multi-Country Survey on Maternal and  
11 Newborn Health. *PLOS ONE*  
12 2014;9:e105155.doi:10.1371/journal.pone.0105155  
13  
14  
15 13. Strand LB, Barnett AG, Tong S. The influence of season and ambient  
16 temperature on birth outcomes: a review of the epidemiological literature.  
17 *ENVIRON RES*2011;111:451-62.doi:10.1016/j.envres.2011.01.023  
18  
19  
20 14. Ha S, Zhu Y, Liu D, et al. Ambient temperature and air quality in relation to  
21 small for gestational age and term low birthweight. *ENVIRON*  
22 *RES*2017;155:394-400.doi:10.1016/j.envres.2017.02.021  
23  
24  
25 15. Lee SJ, Hajat S, Steer PJ, et al. A time-series analysis of any short-term effects  
26 of meteorological and air pollution factors on preterm births in London, UK.  
27 *ENVIRON RES*2008;106:185-94.doi:10.1016/j.envres.2007.10.003  
28  
29  
30 16. Tustin K, Gross J, Hayne H. Maternal exposure to first-trimester sunshine is  
31 associated with increased birth weight in human infants. *DEV*  
32 *PSYCHOBIO*2004;45:221-30.doi:10.1002/dev.20030  
33  
34  
35 17. Madsen C, Gehring U, Walker SE, et al. Ambient air pollution exposure,  
36 residential mobility and term birth weight in Oslo, Norway. *ENVIRON RES*  
37 2010;110:363-71.doi:10.1016/j.envres.2010.02.005  
38  
39  
40 18. Li L, Wang Y. What drives the aerosol distribution in Guangdong--the most  
41 developed province in Southern China? *Sci Rep.* 2014; 4: 5972. doi:  
42 10.1038/srep05972.  
43  
44  
45 19. Johnson S, Bobb JF, Ito K, et al. Ambient Fine Particulate Matter, Nitrogen  
46 Dioxide, and Preterm Birth in New York City. *ENVIRON HEALTH*  
47 *PERSP*2016;124:1283-90.doi:10.1289/ehp.1510266  
48  
49  
50 20. Liu S, Krewski D, Shi Y, et al. Association between gaseous ambient air  
51 pollutants and adverse pregnancy outcomes in Vancouver, Canada. *ENVIRON*  
52  
53  
54  
55  
56  
57  
58  
59  
60

- 
- 1  
2  
3  
4  
5  
6  
7  
8  
9  
10  
11  
12  
13  
14  
15  
16  
17  
18  
19  
20  
21  
22  
23  
24  
25  
26  
27  
28  
29  
30  
31  
32  
33  
34  
35  
36  
37  
38  
39  
40  
41  
42  
43  
44  
45  
46  
47  
48  
49  
50  
51  
52  
53  
54  
55  
56  
57  
58  
59  
60
- HEALTH PERSP*2003;111:1773-8.doi:10.1289/ehp.6251
21. Li Z, Rong Z, Shulian Z, et al. Chinese neonatal birth weight curve for different gestational age. *Chin J Pediatr*2015;53:97-103.
  22. Blencowe H, Cousens S, Oestergaard MZ, et al. National, regional, and worldwide estimates of preterm birth rates in the year 2010 with time trends since 1990 for selected countries: a systematic analysis and implications. *LANCET*2012;379:2162-72.doi:10.1016/S0140-6736(12)60820-4
  23. Liu L, Liu J, Liu Y, et al. Prevalence of preterm birth among singletons in 10 counties(cities)of China, 1993—2005. *Chin J Epidemiology* 2007:1051-4.
  24. Dongmei Y, Liyun Z, Aidong L, et al. Incidence of low birth weight of neonates and the influencing factors in China. *CHINESE JOURNAL OF PREVENTIVE MEDICINE* 2007:150-4.
  25. Yao F, Miao H, Li B, et al. New birthweight percentiles by sex and gestational age in Southern China and its comparison with the INTERGROWTH-21st Standard. *Sci Rep*2018;8:7567.doi:10.1038/s41598-018-25744-7
  26. Georgios B, Athanasios M, Derek H, et al. Preterm birth seasonality in Greece: an epidemiological study. *Journal of Maternal-Fetal Medicine*2012;25:1406-12.
  27. Darrow LA, Strickland MJ, Mitchel K, et al. Seasonality of birth and implications for temporal studies of preterm birth. *EPIDEMIOLOGY*2009;20:699-706.doi:10.1097/ede.0b013e3181a66e96
  28. Woo Y, Ouh Y, Ahn KH, et al. Seasonal Pattern of Preterm Births in Korea for 2000 - 2012. *J KOREAN MED SCI*2016;31:1797-801.doi:10.3346/jkms.2016.31.11.1797
  29. Rousham EK, Gracey M. Seasonality of low birthweight in indigenous Australians: an increase in pre-term birth or intrauterine growth retardation? *Aust N Z J Public Health*2010;22:669-72.doi:10.1111/j.1467-842X.1998.tb01467.x
  30. Rayco-Solon P, Fulford AJ, Prentice AM. Differential effects of seasonality on preterm birth and intrauterine growth restriction in rural Africans. *AM J CLIN NUTR*2005;81:134-9.doi:10.1016/j.jgo.2014.09.086
  31. Hughes MM, Katz J, Mullany LC, et al. Seasonality of birth outcomes in rural

- 
- 1  
2  
3  
4 Sarlahi District, Nepal: a population-based prospective cohort. *BMC Pregnancy*  
5 *Childbirth*2014;14:310.doi:10.1186/1471-2393-14-310  
6  
7  
8 32. Lee SJ, Steer PJ, Filippi V. Seasonal patterns and preterm birth: a systematic  
9 review of the literature and an analysis in a London-based cohort.  
10 *BJOG*2006;113:1280-8.doi:10.1111/j.1471-0528.2006.01055.x  
11  
12  
13 33. Konte JM, Creasy RK, Laros RJ. California North Coast Preterm Birth  
14 Prevention project. *OBSTET*  
15 *GYNECOL*1988;71:727-30.doi:10.1016/0378-5122(88)90133-8  
16  
17  
18 34. Stan CM, Boulvain M, Pfister R, et al. Hydration for treatment of preterm labour.  
19 *Cochrane Database Syst Rev* 2013:D3096.doi:10.1002/14651858.CD003096  
20  
21  
22  
23 35. McGrath JJ, Barnett AG, Eyles DW. The association between birth weight,  
24 season of birth and latitude. *ANN HUM*  
25 *BIOL*2005;32:547-59.doi:10.1080/03014460500154699  
26  
27  
28 36. Kim SE, Honda Y, Hashizume M, et al. Seasonal analysis of the short-term  
29 effects of air pollution on daily mortality in Northeast Asia. *SCI TOTAL*  
30 *ENVIRON*2017;576:850-7.doi:10.1016/j.scitotenv.2016.10.036  
31  
32  
33 37. Sugawara J, Iwama N, Hoshiai T, et al. Regional Birth Outcomes after the 2011  
34 Great East Japan Earthquake and Tsunami in Miyagi Prefecture. *Prehosp*  
35 *Disaster Med*2018;33:215-9.doi:10.1017/S1049023X18000183  
36  
37  
38 38. de Souza BV, Hirakata V, Goldani MZ, et al. Temporal evolution of the risk  
39 factors associated with low birth weight rates in Brazilian capitals (1996-2011).  
40 *Popul Health Metr*2016;14:15. doi:10.1186/s12963-016-0086-0  
41  
42  
43 39. Trasande L, Malecha P, Attina TM. Particulate Matter Exposure and Preterm  
44 Birth: Estimates of U.S. Attributable Burden and Economic Costs. *ENVIRON*  
45 *HEALTH PERSP*2016;124:1913-8.doi:10.1289/ehp.1510810  
46  
47  
48 40. Woodruff TJ, Parker JD, Darrow LA, et al. Methodological issues in studies of  
49 air pollution and reproductive health. *ENVIRON RES.*  
50 2009;109:311-20.doi:10.1016/j.envres.2008.12.012  
51  
52  
53 41. Pandolfi E, Agricola E, Gonfiantini MV, et al. Women participating in a  
54 web-based preconception study have a high prevalence of risk factors for adverse  
55  
56  
57  
58  
59  
60

---

pregnancy outcomes. *BMC Pregnancy Childbirth*. 2014, 17;14:169. doi:  
10.1186/1471-2393-14-169.

42. Yuan Y, Wu FL. Regional Social Inequalities and Social Deprivation in Guangdong Province, China. *Growth & Change*. 2013; 44; 149-167. doi:  
10.1111/grow.12005
43. Schempf A, Strobino D, O'Campo P. Neighborhood effects on birthweight: an exploration of psychosocial and behavioral pathways in Baltimore, 1995--1996. *SOC SCI MED*2009;68:100-10.



---

## Figure legends

**Figure 1. Geographical locations of the study.** Guangdong province is located in south China, and there are twenty-one cities including Guangzhou, Shenzhen, Foshan, Dongguan, Zhuhai, Zhongshan, Zhaoqing, Huizhou, Jiangmen, Chaozhou, Shantou, Jieyang, Meizhou, Shanwei, Shaoguan, Heyuan, Qingyuan, Yunfu, Yangjiang, Maoming, and Zhanjiang included in this study. The Pearl River Delta regions were marked with pink, and the Non-Pearl River Delta regions were indicated by light blue.

**Figure 2. Daily time-series plots of rates for the adverse pregnancy outcomes including preterm birth (PTB), low birth weight (LBW) and small for gestational age (SGA) in Guangdong province, China, from 1 January 2014 to 31 December 2017.**

**Figure 3. Heatmaps of weekly counts for the adverse pregnancy outcomes including preterm birth, low birth weight and small for gestational age across cities in Guangdong province, China, from January 1, 2014 to December 31, 2017.**

**Figure 4. Spatial distributions of rates of preterm birth (PTB), in Guangdong province, China, from January 1, 2014 to December 31, 2017. (A) Spatial distributions of PTB rates in 2014. (B) Spatial distributions of PTB rates in 2015. (C) Spatial distributions of PTB rates in 2016. (D) Spatial distributions of PTB rates in 2017.**

**Figure 5. Spatial distributions of rates of low birth weight (LBW), in Guangdong province, China, from January 1, 2014 to December 31, 2017. (A) Spatial distributions of LBW rates in 2014. (B) Spatial distributions of LBW rates in 2015. (C) Spatial distributions of LBW rates in 2016. (D) Spatial distributions of LBW rates in 2017.**

1  
2  
3  
4 **Figure 6. Spatial distributions of rates of small for gestational age (SGA), in**  
5 **Guangdong province, China, from January 1, 2014 to December 31, 2017. (A)**  
6 **Spatial distributions of SGA rates in 2014. (B) Spatial distributions of SGA rates in**  
7 **2015. (C) Spatial distributions of SGA rates in 2016. (D) Spatial distributions of SGA**  
8 **rates in 2017.**  
9  
10  
11  
12  
13  
14  
15  
16  
17  
18  
19  
20  
21  
22  
23  
24  
25  
26  
27  
28  
29  
30  
31  
32  
33  
34  
35  
36  
37  
38  
39  
40  
41  
42  
43  
44  
45  
46  
47  
48  
49  
50  
51  
52  
53  
54  
55  
56  
57  
58  
59  
60

For peer review only

## Tables

**Table 1. Basic characteristics of the study participants.**

| Characteristic                  | Category                     | Frequency | Percentage |
|---------------------------------|------------------------------|-----------|------------|
| Maternal age (years)            | < 20                         | 78116     | 2.68       |
|                                 | 20-24                        | 664443    | 22.78      |
|                                 | 25-29                        | 1163071   | 39.87      |
|                                 | 30-34                        | 682067    | 23.38      |
|                                 | ≥ 35                         | 329378    | 11.29      |
|                                 | Missing                      | 23        | 0.00       |
| Inhabited city                  | Pearl River Delta region     | 1254102   | 42.99      |
|                                 | Non-Pearl River Delta region | 1662996   | 57.01      |
| Infant sex                      | Boy                          | 1553948   | 53.27      |
|                                 | Girl                         | 1363125   | 46.73      |
|                                 | Missing                      | 25        | 0.00       |
| Year of birth                   | 2014                         | 763518    | 26.17      |
|                                 | 2015                         | 627146    | 21.50      |
|                                 | 2016                         | 794755    | 27.24      |
|                                 | 2017                         | 731679    | 25.08      |
| Season of birth                 | Spring                       | 675595    | 23.16      |
|                                 | Summer                       | 717762    | 24.61      |
|                                 | Autumn                       | 804275    | 27.57      |
|                                 | Winter                       | 719466    | 24.66      |
| Preterm birth                   | Yes                          | 121245    | 4.16       |
|                                 | No                           | 2792953   | 95.74      |
|                                 | Missing                      | 2900      | 0.10       |
| Low birth weight (LBW)          | Yes                          | 120846    | 4.14       |
|                                 | No                           | 2796122   | 95.85      |
|                                 | Missing                      | 130       | 0.00       |
| Small for gestational age (SGA) | Yes                          | 384637    | 12.86      |
|                                 | No                           | 2529522   | 82.88      |
|                                 | Missing                      | 2939      | 4.26       |
| Low birth weight (Yes)          | Preterm                      | 56748     | 46.96      |
|                                 | Full-term                    | 63968     | 52.93      |
|                                 | Missing                      | 130       | 0.11       |
| Small for gestational age (Yes) | Preterm                      | 9499      | 2.47       |
|                                 | Full-term                    | 375138    | 97.53      |

**Table 2. Rates of preterm birth (PTB), low birth weight (LBW) and small for gestational age (SGA) according to demographic characteristics, residence address and birth season by year.**

| Year   | Characteristic               | Adverse pregnancy outcome |                 |         |                 |         |                 |
|--------|------------------------------|---------------------------|-----------------|---------|-----------------|---------|-----------------|
|        |                              | PTB (%)                   | <i>P</i> -value | LBW (%) | <i>P</i> -value | SGA (%) | <i>P</i> -value |
| 2014   | Maternal age (years)         |                           | <0.0001         |         | <0.0001         |         | <0.0001         |
|        | < 35                         | 3.79                      |                 | 4.04    |                 | 14.39   |                 |
|        | ≥ 35                         | 6.43                      |                 | 5.17    |                 | 10.54   |                 |
|        | Inhabited city               |                           | <0.0001         |         | <0.0001         |         | <0.0001         |
|        | Pearl River Delta region     | 5.03                      |                 | 4.49    |                 | 11.75   |                 |
|        | Non-Pearl River Delta region | 3.39                      |                 | 3.91    |                 | 15.43   |                 |
|        | Infant sex                   |                           | <0.0001         |         | <0.0001         |         | <0.0001         |
|        | Boy                          | 4.43                      |                 | 3.63    |                 | 13.81   |                 |
|        | Girl                         | 3.47                      |                 | 4.68    |                 | 14.46   |                 |
|        | Season of birth              |                           | <0.0001         |         | 0.0003          |         | <0.0001         |
|        | Spring                       | 3.78                      |                 | 3.96    |                 | 13.85   |                 |
|        | Summer                       | 3.85                      |                 | 4.19    |                 | 14.88   |                 |
| Autumn | 3.8                          |                           | 4.21            |         | 14.88           |         |                 |
| Winter | 4.48                         |                           | 4.1             |         | 12.8            |         |                 |
| 2015   | Maternal age (years)         |                           | <0.0001         |         | <0.0001         |         | <0.0001         |
|        | < 35                         | 3.79                      |                 | 4.05    |                 | 14.09   |                 |
|        | ≥ 35                         | 6.5                       |                 | 4.91    |                 | 9.51    |                 |
|        | Inhabited city               |                           | <0.0001         |         | <0.0001         |         | <0.0001         |
|        | Pearl River Delta region     | 5.13                      |                 | 4.48    |                 | 11.06   |                 |
|        | Non-Pearl River Delta region | 3.43                      |                 | 3.93    |                 | 15.12   |                 |
|        | Infant sex                   |                           | <0.0001         |         | <0.0001         |         | <0.0001         |
|        | Boy                          | 4.51                      |                 | 3.68    |                 | 13.43   |                 |
|        | Girl                         | 3.47                      |                 | 4.63    |                 | 14.01   |                 |
|        | Season of birth              |                           | <0.0001         |         | <0.0001         |         | <0.0001         |
|        | Spring                       | 4.02                      |                 | 4.08    |                 | 13.36   |                 |
|        | Summer                       | 4.03                      |                 | 4.33    |                 | 14.59   |                 |
| Autumn | 3.87                         |                           | 4.19            |         | 14.24           |         |                 |
| Winter | 4.2                          |                           | 3.87            |         | 12.53           |         |                 |
| 2016   | Maternal age (years)         |                           | <0.0001         |         | <0.0001         |         | <0.0001         |
|        | < 35                         | 4.24                      |                 | 3.98    |                 | 12.4    |                 |
|        | ≥ 35                         | 6.87                      |                 | 4.88    |                 | 8.5     |                 |
|        | Inhabited city               |                           | <0.0001         |         | <0.0001         |         | <0.0001         |
|        | Pearl River Delta region     | 5.28                      |                 | 4.25    |                 | 9.9     |                 |
|        | Non-Pearl River Delta region | 3.82                      |                 | 3.92    |                 | 13.93   |                 |
|        | Infant sex                   |                           | <0.0001         |         | <0.0001         |         | <0.0001         |
|        | Boy                          | 5.02                      |                 | 3.61    |                 | 11.7    |                 |
|        | Girl                         | 4                         |                 | 4.62    |                 | 12.23   |                 |

1  
2  
3  
4  
5  
6  
7  
8  
9  
10  
11  
12  
13  
14  
15  
16  
17  
18  
19  
20  
21  
22  
23  
24  
25  
26  
27  
28  
29  
30  
31  
32  
33  
34  
35  
36  
37  
38  
39  
40  
41  
42  
43  
44  
45  
46  
47  
48  
49  
50  
51  
52  
53  
54  
55  
56  
57  
58  
59  
60

|      |                              |      |         |      |         |         |
|------|------------------------------|------|---------|------|---------|---------|
|      | Season of birth              |      | 0.0011  |      | <0.0001 | <0.0001 |
|      | Spring                       | 4.49 |         | 4.02 |         | 11.76   |
|      | Summer                       | 4.66 |         | 4.29 |         | 12.37   |
|      | Autumn                       | 4.43 |         | 4.08 |         | 12.01   |
|      | Winter                       | 4.6  |         | 3.93 |         | 11.58   |
| 2017 | Maternal age (years)         |      | <0.0001 |      | <0.0001 | <0.0001 |
|      | < 35                         | 3.67 |         | 4.11 |         | 13.85   |
|      | ≥ 35                         | 5.83 |         | 4.89 |         | 10.05   |
|      | Inhabited city               |      | <0.0001 |      | <0.0001 | <0.0001 |
|      | Pearl River Delta region     | 4.27 |         | 4.42 |         | 12.56   |
|      | Non-Pearl River Delta region | 3.82 |         | 4.08 |         | 13.82   |
|      | Infant sex                   |      | <0.0001 |      | <0.0001 | 0.1572  |
|      | Boy                          | 4.53 |         | 3.78 |         | 13.13   |
|      | Girl                         | 3.5  |         | 4.78 |         | 13.24   |
|      | Season of birth              |      | <0.0001 |      | <0.0001 | <0.0001 |
|      | Spring                       | 3.91 |         | 4.14 |         | 12.57   |
|      | Summer                       | 3.94 |         | 4.36 |         | 13.91   |
|      | Autumn                       | 3.98 |         | 4.46 |         | 14.23   |
|      | Winter                       | 4.36 |         | 4.04 |         | 12.02   |



Fig 1

1  
2  
3  
4  
5  
6  
7  
8  
9  
10  
11  
12  
13  
14  
15  
16  
17  
18  
19  
20  
21  
22  
23  
24  
25  
26  
27  
28  
29  
30  
31  
32  
33  
34  
35  
36  
37  
38  
39  
40  
41  
42  
43  
44  
45  
46  
47  
48  
49  
50  
51  
52  
53  
54  
55  
56  
57  
58  
59  
60

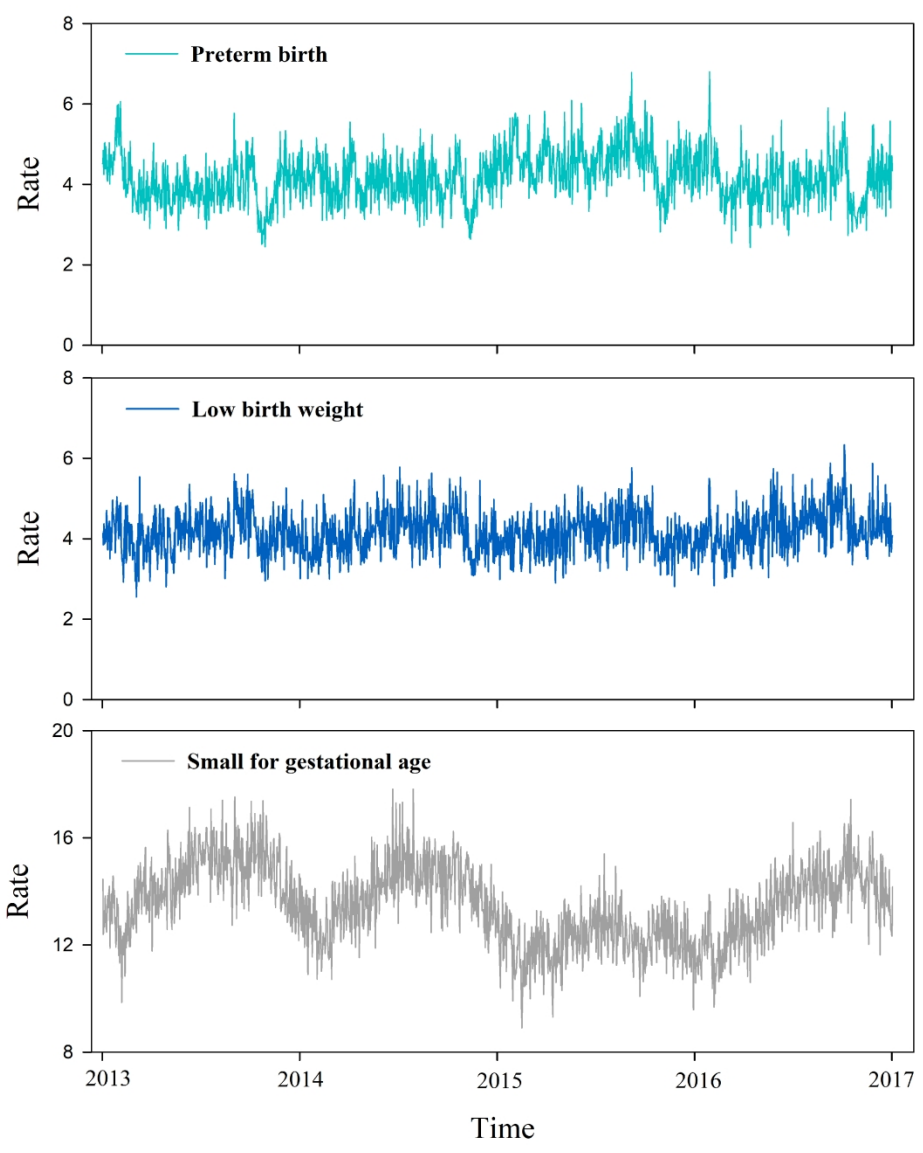

Fig 2

1  
2  
3  
4  
5  
6  
7  
8  
9  
10  
11  
12  
13  
14  
15  
16  
17  
18  
19  
20  
21  
22  
23  
24  
25  
26  
27  
28  
29  
30  
31  
32  
33  
34  
35  
36  
37  
38  
39  
40  
41  
42  
43  
44  
45  
46  
47  
48  
49  
50  
51  
52  
53  
54  
55  
56  
57  
58  
59  
60



Fig 3



1  
2  
3  
4  
5  
6  
7  
8  
9  
10  
11  
12  
13  
14  
15  
16  
17  
18  
19  
20  
21  
22  
23  
24  
25  
26  
27  
28  
29  
30  
31  
32  
33  
34  
35  
36  
37  
38  
39  
40  
41  
42  
43  
44  
45  
46  
47  
48  
49  
50  
51  
52  
53  
54  
55  
56  
57  
58  
59  
60



Fig 4



Fig 5

1  
2  
3  
4  
5  
6  
7  
8  
9  
10  
11  
12  
13  
14  
15  
16  
17  
18  
19  
20  
21  
22  
23  
24  
25  
26  
27  
28  
29  
30  
31  
32  
33  
34  
35  
36  
37  
38  
39  
40  
41  
42  
43  
44  
45  
46  
47  
48  
49  
50  
51  
52  
53  
54  
55  
56  
57  
58  
59  
60



Fig 6

## Supplementary File

**Figure S1. The results of purely spatial clustering of preterm births according to the Kulldorff's spatial scan statistic. The most likely cluster identified was marked with red.**



**Figure S2. The results of purely spatial clustering of low birth weight infants according to the Kulldorff's spatial scan statistic. The most likely cluster identified was marked with red.**

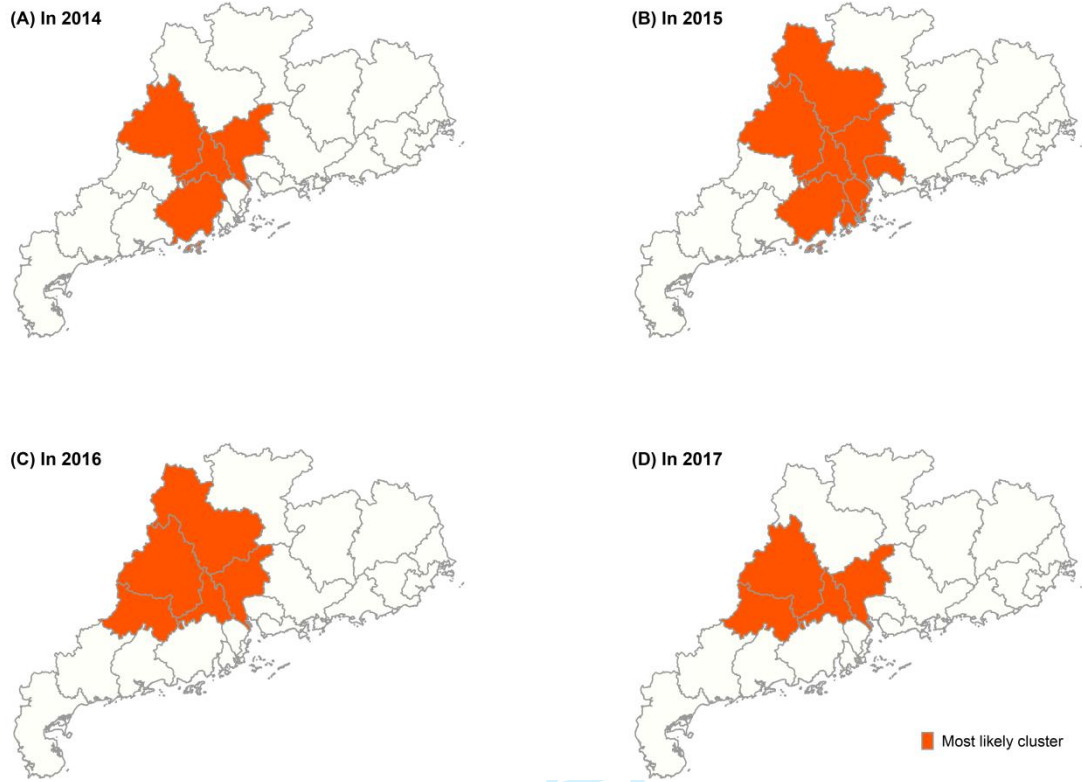

1  
2  
3  
4 **Figure S3. The results of purely spatial clustering of small-for-gestational-age**  
5 **infants according to the Kulldorff's spatial scan statistic. The most likely cluster**  
6 **identified was marked with red.**  
7  
8

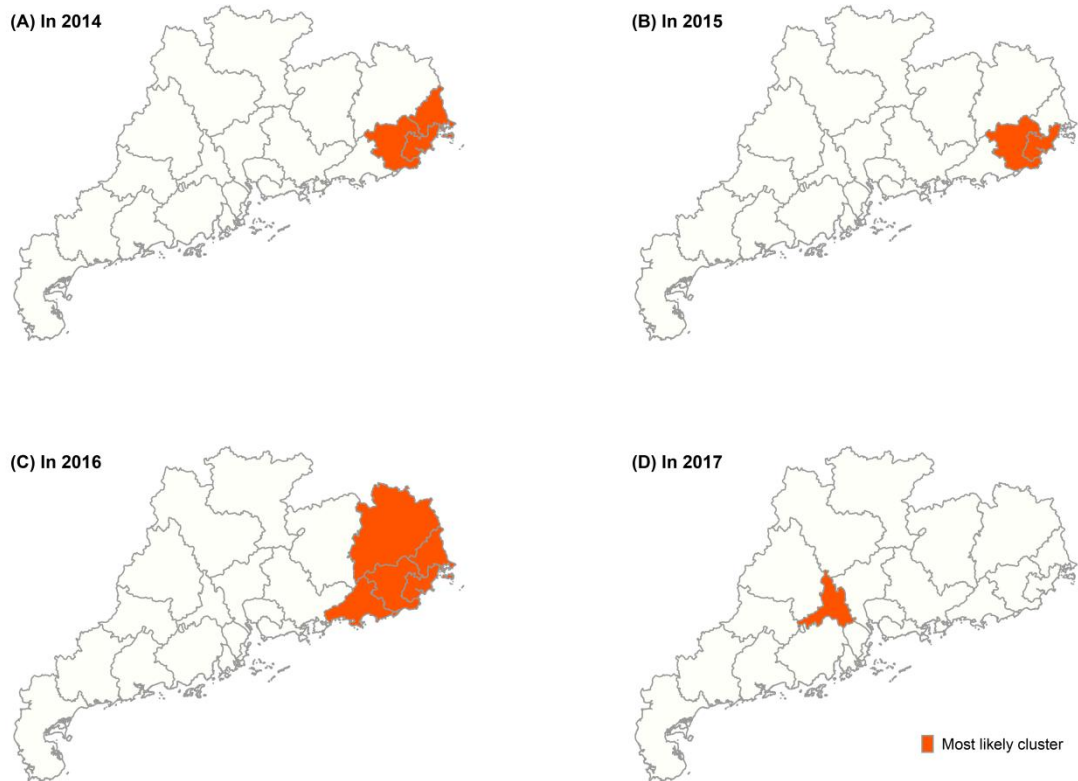

**Table S1. The results of purely spatial clustering according to the Kulldorff's spatial scan statistic.** The results of the most likely cluster by adverse birth outcome are shown.

| Outcome | Year | Coordinates         | Observed cases | Expected cases | LLR     | <i>P</i> -value |
|---------|------|---------------------|----------------|----------------|---------|-----------------|
| PTB     | 2014 | 22.5160N, 113.3926E | 9439           | 8669.02        | 560.61  | 0.00            |
|         | 2015 | 22.5603N, 113.1110E | 10716          | 9995.57        | 456.72  | 0.00            |
|         | 2016 | 23.0710N, 112.0032E | 11809          | 10390.57       | 320.46  | 0.00            |
|         | 2017 | 22.5533N, 113.8831E | 8892           | 8530.58        | 780.61  | 0.00            |
| LBW     | 2014 | 22.9003N, 112.8926E | 8037           | 6820.77        | 133.05  | 0.00            |
|         | 2015 | 22.9003N, 112.8926E | 12099          | 10424.63       | 135.78  | 0.00            |
|         | 2016 | 23.1582N, 112.5671E | 9840           | 8510.90        | 162.32  | 0.00            |
|         | 2017 | 23.1582N, 112.5671E | 7792           | 6677.31        | 73.06   | 0.00            |
| SGA     | 2014 | 23.4624N, 116.6781E | 5943           | 6331.37        | 404.23  | 0.00            |
|         | 2015 | 23.2503N, 116.4331E | 5013           | 5357.05        | 430.82  | 0.00            |
|         | 2016 | 23.4624N, 116.6781E | 9158           | 10061.89       | 691.66  | 0.00            |
|         | 2017 | 22.9203N, 112.8926E | 1824           | 1464.99        | 3260.36 | 0.00            |

PTB: Preterm birth; LBW: Low birth weight; SGA: small for gestational age; LLR: Log likelihood ratio.

Coordinates: The coordinates of the most likely cluster.

STROBE Statement—Checklist of items that should be included in reports of *cross-sectional studies*

|                              | Item No | Recommendation                                                                                                                                                                                               | Page No |
|------------------------------|---------|--------------------------------------------------------------------------------------------------------------------------------------------------------------------------------------------------------------|---------|
| <b>Title and abstract</b>    | 1       | (a) Indicate the study's design with a commonly used term in the title or the abstract                                                                                                                       | 1       |
|                              |         | (b) Provide in the abstract an informative and balanced summary of what was done and what was found                                                                                                          | 2       |
| <b>Introduction</b>          |         |                                                                                                                                                                                                              |         |
| Background/rationale         | 2       | Explain the scientific background and rationale for the investigation being reported                                                                                                                         | 4       |
| Objectives                   | 3       | State specific objectives, including any prespecified hypotheses                                                                                                                                             | 5       |
| <b>Methods</b>               |         |                                                                                                                                                                                                              |         |
| Study design                 | 4       | Present key elements of study design early in the paper                                                                                                                                                      | 5       |
| Setting                      | 5       | Describe the setting, locations, and relevant dates, including periods of recruitment, exposure, follow-up, and data collection                                                                              | 5       |
| Participants                 | 6       | (a) Give the eligibility criteria, and the sources and methods of selection of participants                                                                                                                  | 5       |
| Variables                    | 7       | Clearly define all outcomes, exposures, predictors, potential confounders, and effect modifiers. Give diagnostic criteria, if applicable                                                                     | 6       |
| Data sources/<br>measurement | 8*      | For each variable of interest, give sources of data and details of methods of assessment (measurement). Describe comparability of assessment methods if there is more than one group                         | 6       |
| Bias                         | 9       | Describe any efforts to address potential sources of bias                                                                                                                                                    | 6       |
| Study size                   | 10      | Explain how the study size was arrived at                                                                                                                                                                    | 6       |
| Quantitative variables       | 11      | Explain how quantitative variables were handled in the analyses. If applicable, describe which groupings were chosen and why                                                                                 | 6       |
| Statistical methods          | 12      | (a) Describe all statistical methods, including those used to control for confounding                                                                                                                        | 6,7     |
|                              |         | (b) Describe any methods used to examine subgroups and interactions                                                                                                                                          |         |
|                              |         | (c) Explain how missing data were addressed                                                                                                                                                                  |         |
|                              |         | (d) If applicable, describe analytical methods taking account of sampling strategy                                                                                                                           | 6       |
|                              |         | (e) Describe any sensitivity analyses                                                                                                                                                                        |         |
| <b>Results</b>               |         |                                                                                                                                                                                                              |         |
| Participants                 | 13*     | (a) Report numbers of individuals at each stage of study—eg numbers potentially eligible, examined for eligibility, confirmed eligible, included in the study, completing follow-up, and analysed            | 7       |
|                              |         | (b) Give reasons for non-participation at each stage                                                                                                                                                         |         |
|                              |         | (c) Consider use of a flow diagram                                                                                                                                                                           |         |
| Descriptive data             | 14*     | (a) Give characteristics of study participants (eg demographic, clinical, social) and information on exposures and potential confounders                                                                     | 7       |
|                              |         | (b) Indicate number of participants with missing data for each variable of interest                                                                                                                          |         |
| Outcome data                 | 15*     | Report numbers of outcome events or summary measures                                                                                                                                                         | 7-9     |
| Main results                 | 16      | (a) Give unadjusted estimates and, if applicable, confounder-adjusted estimates and their precision (eg, 95% confidence interval). Make clear which confounders were adjusted for and why they were included |         |



|                          |    |                                                                                                                                                                            |      |
|--------------------------|----|----------------------------------------------------------------------------------------------------------------------------------------------------------------------------|------|
|                          |    | (b) Report category boundaries when continuous variables were categorized                                                                                                  |      |
|                          |    | (c) If relevant, consider translating estimates of relative risk into absolute risk for a meaningful time period                                                           |      |
| Other analyses           | 17 | Report other analyses done—eg analyses of subgroups and interactions, and sensitivity analyses                                                                             |      |
| <b>Discussion</b>        |    |                                                                                                                                                                            |      |
| Key results              | 18 | Summarise key results with reference to study objectives                                                                                                                   | 9-12 |
| Limitations              | 19 | Discuss limitations of the study, taking into account sources of potential bias or imprecision. Discuss both direction and magnitude of any potential bias                 | 12   |
| Interpretation           | 20 | Give a cautious overall interpretation of results considering objectives, limitations, multiplicity of analyses, results from similar studies, and other relevant evidence | 12   |
| Generalisability         | 21 | Discuss the generalisability (external validity) of the study results                                                                                                      |      |
| <b>Other information</b> |    |                                                                                                                                                                            |      |
| Funding                  | 22 | Give the source of funding and the role of the funders for the present study and, if applicable, for the original study on which the present article is based              | 13   |

\*Give information separately for exposed and unexposed groups.

**Note:** An Explanation and Elaboration article discusses each checklist item and gives methodological background and published examples of transparent reporting. The STROBE checklist is best used in conjunction with this article (freely available on the Web sites of PLoS Medicine at <http://www.plosmedicine.org/>, Annals of Internal Medicine at <http://www.annals.org/>, and Epidemiology at <http://www.epidem.com/>). Information on the STROBE Initiative is available at [www.strobe-statement.org](http://www.strobe-statement.org).
