# Supplementary material for: Adverse birth outcomes in Guangdong province, China, 2014–2017: a spatiotemporal analysis of 2.9 million births
Source: PubMed Central journal article supplement — BMJ Open. 2019 Nov 14;9(11):e030629. doi: 10.1136/bmjopen-2019-030629 (PMC6886959; doi:10.1136/bmjopen-2019-030629), 2019-11-14
Supplement: bmjopen-2019-030629supp001.pdf [file bmjopen-2019-030629supp001.pdf]

**Supplementary File**

**Figure S1. The results of purely spatial clustering of preterm births according to the Kulldorff's spatial scan statistic. The most likely cluster identified was marked with red.**

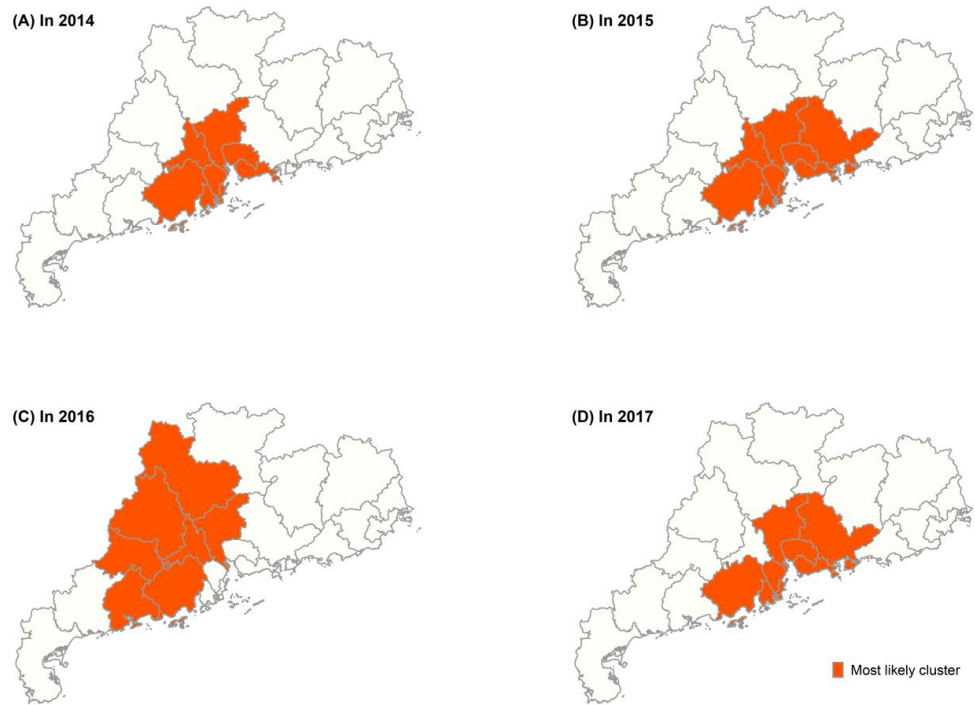

**Figure S2. The results of purely spatial clustering of low birth weight infants according to the Kulldorff's spatial scan statistic. The most likely cluster identified was marked with red.**

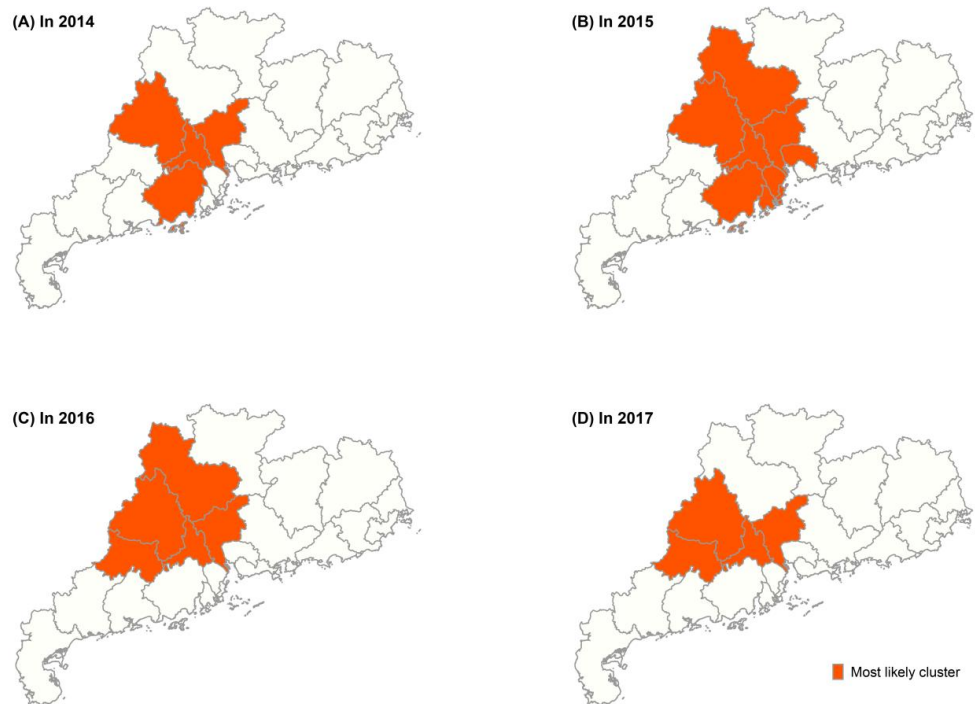

**Figure S3. The results of purely spatial clustering of small-for-gestational-age infants according to the Kulldorff's spatial scan statistic. The most likely cluster identified was marked with red.**

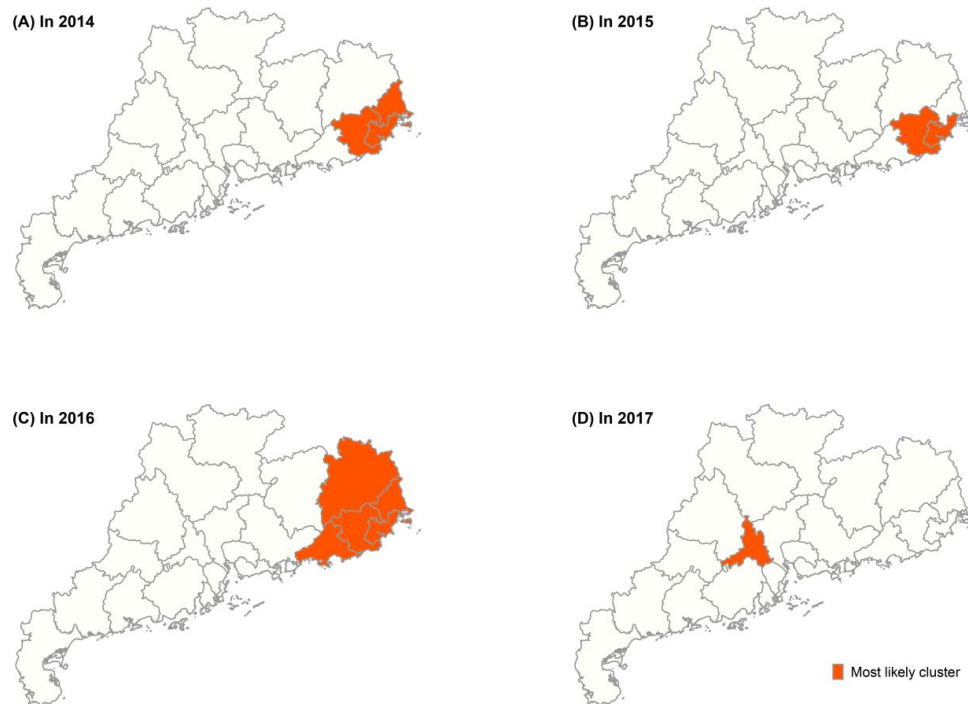

**Table S1. The results of purely spatial clustering according to the Kulldorff's spatial scan statistic.** The results of the most likely cluster by adverse birth outcome are shown.

| Outcome | Year | Coordinates         | Observed cases | Expected cases | LLR     | P-value |
|---------|------|---------------------|----------------|----------------|---------|---------|
| PTB     | 2014 | 22.5160N, 113.3926E | 9439           | 8669.02        | 560.61  | 0.00    |
|         | 2015 | 22.5603N, 113.1110E | 10716          | 9995.57        | 456.72  | 0.00    |
|         | 2016 | 23.0710N, 112.0032E | 11809          | 10390.57       | 320.46  | 0.00    |
|         | 2017 | 22.5533N, 113.8831E | 8892           | 8530.58        | 780.61  | 0.00    |
| LBW     | 2014 | 22.9003N, 112.8926E | 8037           | 6820.77        | 133.05  | 0.00    |
|         | 2015 | 22.9003N, 112.8926E | 12099          | 10424.63       | 135.78  | 0.00    |
|         | 2016 | 23.1582N, 112.5671E | 9840           | 8510.90        | 162.32  | 0.00    |
|         | 2017 | 23.1582N, 112.5671E | 7792           | 6677.31        | 73.06   | 0.00    |
| SGA     | 2014 | 23.4624N, 116.6781E | 5943           | 6331.37        | 404.23  | 0.00    |
|         | 2015 | 23.2503N, 116.4331E | 5013           | 5357.05        | 430.82  | 0.00    |
|         | 2016 | 23.4624N, 116.6781E | 9158           | 10061.89       | 691.66  | 0.00    |
|         | 2017 | 22.9203N, 112.8926E | 1824           | 1464.99        | 3260.36 | 0.00    |

PTB: Preterm birth; LBW: Low birth weight; SGA: small for gestational age; LLR: Log likelihood ratio.

Coordinates: The coordinates of the most likely cluster.
